# Supplementary material for: ZNF354C is a transcriptional repressor that inhibits endothelial angiogenic sprouting
Source: Springer Nature journal article supplement (doi:10.1038/s41598-020-76193-0), 2020-11-05

## Supplementary Information

### ZNF354C is a transcriptional repressor that inhibits endothelial angiogenic sprouting

James A. Oo<sup>1,3</sup>, Barnabas Irmer<sup>1</sup>, Stefan Günther<sup>2</sup>, Timothy Warwick<sup>1</sup>, Katalin Pálfi<sup>1</sup>, Judit Izquierdo Ponce<sup>1</sup>, Tom Teichmann<sup>1</sup>, Beatrice Pflüger-Müller<sup>1,3</sup>, Ralf Gilsbach<sup>1,3</sup>, Ralf P. Brandes<sup>1,3</sup>, Matthias S. Leisegang<sup>1,3\*</sup>

<sup>1</sup>Institute for Cardiovascular Physiology, Goethe University, Frankfurt, Germany

<sup>2</sup>Max Planck Institute for Heart and Lung Research, Bad Nauheim, Germany

<sup>3</sup>German Center of Cardiovascular Research (DZHK), Partner site RheinMain, Frankfurt, Germany

\* Corresponding author

Matthias S. Leisegang, PhD

Institut für Kardiovaskuläre Physiologie

Fachbereich Medizin der Goethe-Universität

Theodor-Stern-Kai 7

60590 Frankfurt am Main, Germany

Tel.: +49-69-6301-6996

Fax.: +49-69-6301-7668

Email: [Leisegang@vrc.uni-frankfurt.de](mailto:Leisegang@vrc.uni-frankfurt.de)

Supplementary information file contains

- Supplementary figure 1
- Supplementary figure 2
- Supplementary figure 3
- Uncropped western blots

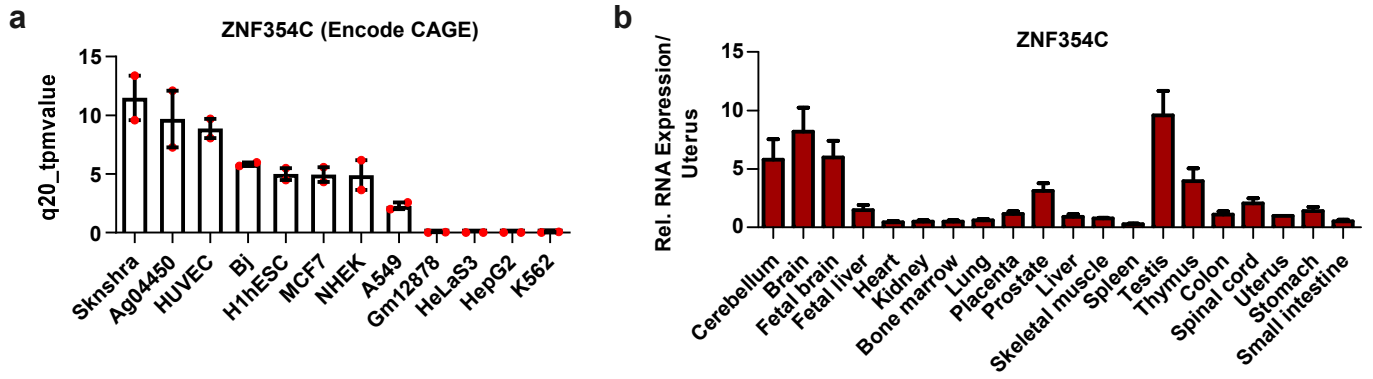

**Supplementary Figure 1:** (a) Encode FANTOM5 Cap Analysis of Gene Expression data of ZNF354C in representative cell types (whole cell). Q20 transcripts per million is shown on the Y-axis. n=2. Data are mean  $\pm$  SEM. (b) Expression of ZNF354C in 20 different human tissues measured by RT-qPCR relative to Uterus expression, which was set to 1. n=3.

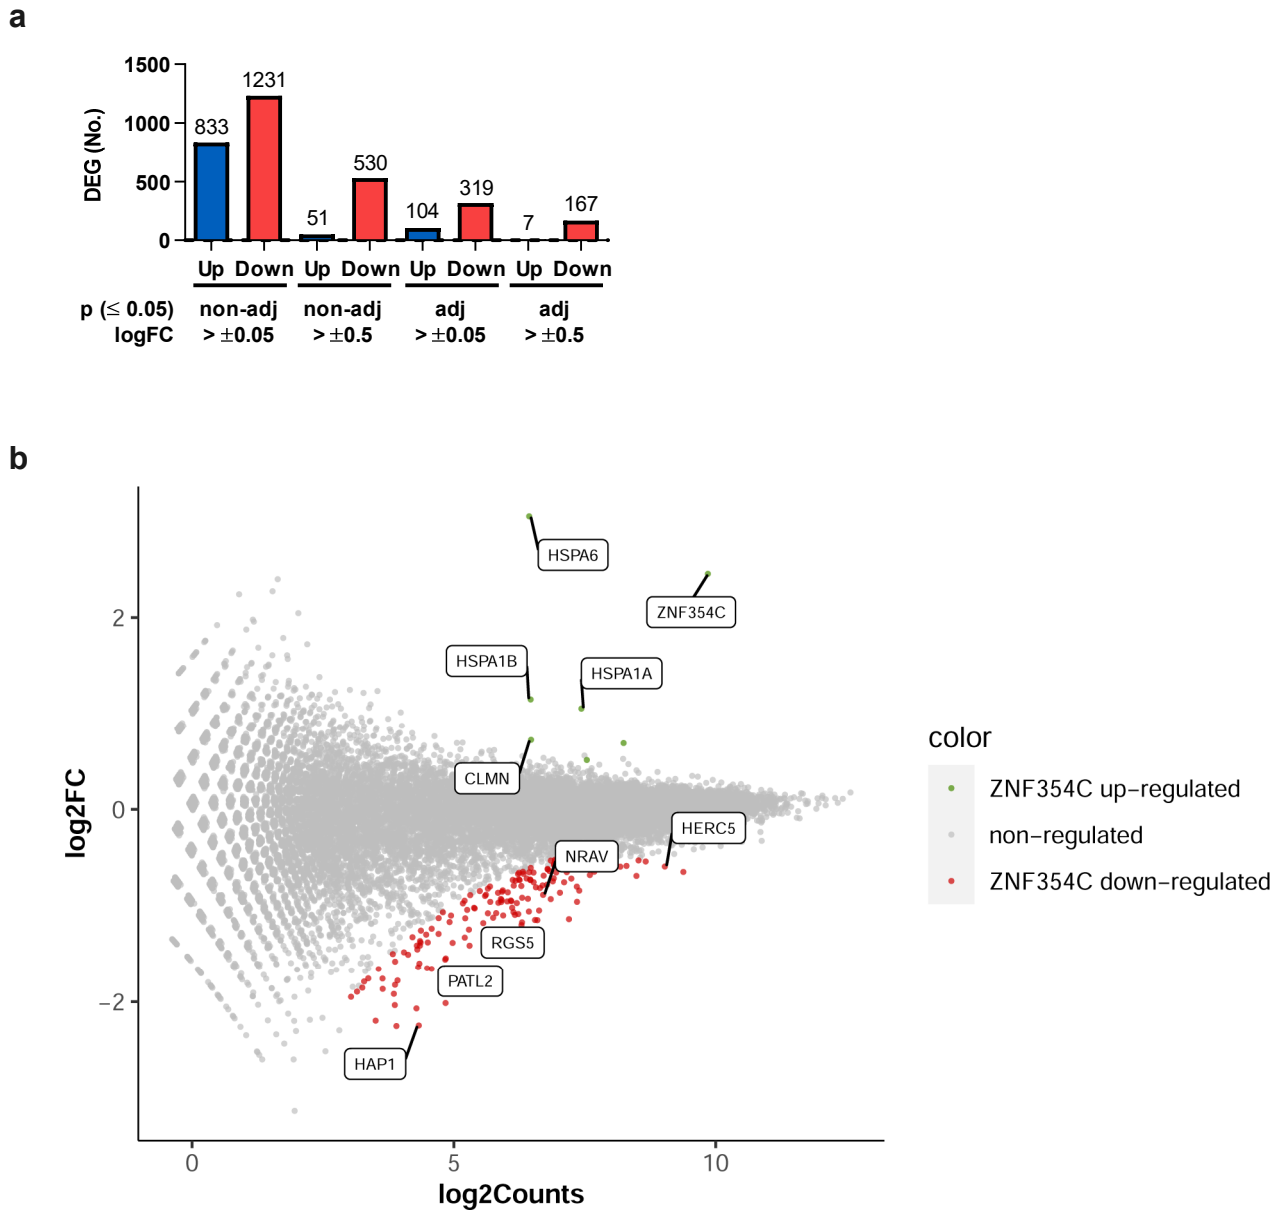

**Supplementary Figure 2:** (a) Number of differentially expressed genes (DEG) of the RNA-Seq of up- or downregulated genes after ZNF354C overexpression. Conditions are indicated (adjusted or non-adjusted  $p$ -value $<0.05$ ;  $\log_2FC > \pm 0.05$  or  $> \pm 0.5$ ). (b) MA plot of RNA-Seq after overexpression of pCMV6-ZNF354C (ZNF354C) or pCMV6-Entry (CTRL). Conditions are adjusted  $p$ -value $<0.05$  (FDR); Colored points indicate genes significantly differentially expressed ( $\log_2FC > \pm 0.5$ ). Red, ZNF354C downregulated genes; green, ZNF354C upregulated genes; grey, non-regulated genes ( $\log_2FC < \pm 0.5$ ).

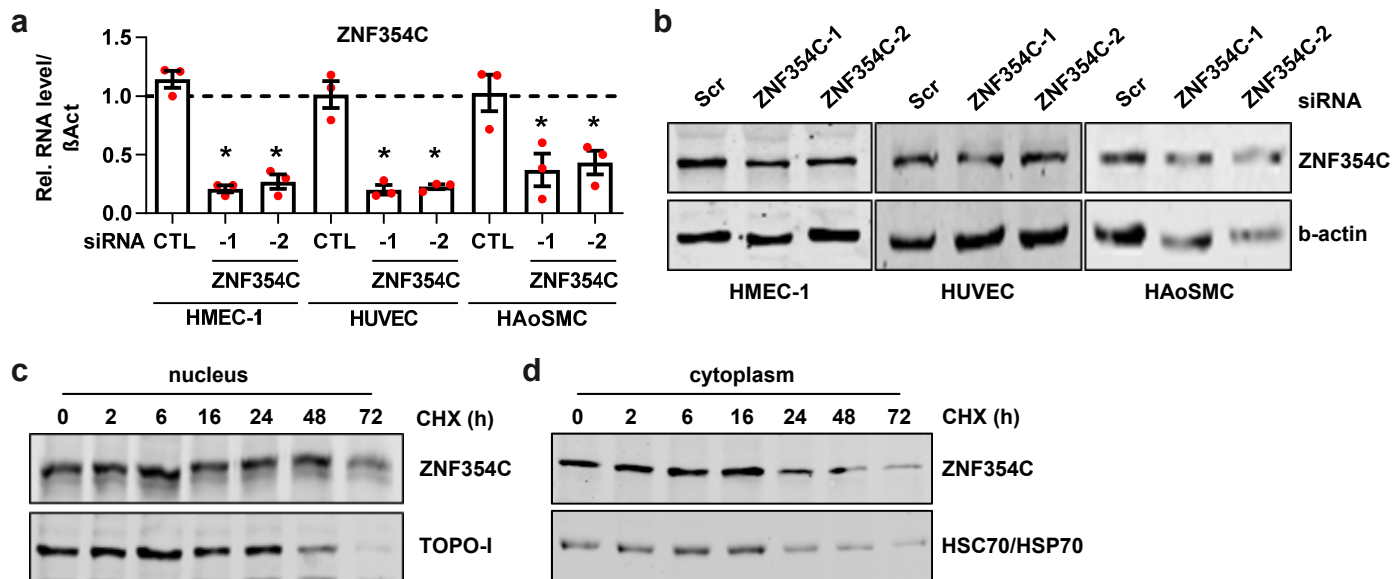

**Supplementary Figure 3:** (a) RT-qPCR of ZNF354C after transfection of HMEC-1, HUVEC or HAoSMC with siRNAs targeting ZNF354C (-1, -2). Scrambled siRNA (CTL) served as negative control. n=3. Data are mean  $\pm$  SEM. Mann-Whitney t-test; \*P<0.05. (b) Western blot after transfection of HMEC-1, HUVEC or HAoSMC with siRNAs targeting ZNF354C (-1, -2). Scrambled siRNA (CTL) served as negative control. ZNF354C and b-actin antibodies were used. (c&d) Western blot after fractionation of HUVEC into nucleus (c) and cytoplasm (d) and treatment with Cycloheximide (CHX) for the indicate time (h). ZNF354C, Topoisomerase I (Topo-I) and HSC70/HSP70 antibodies were used.

Fig. 1B

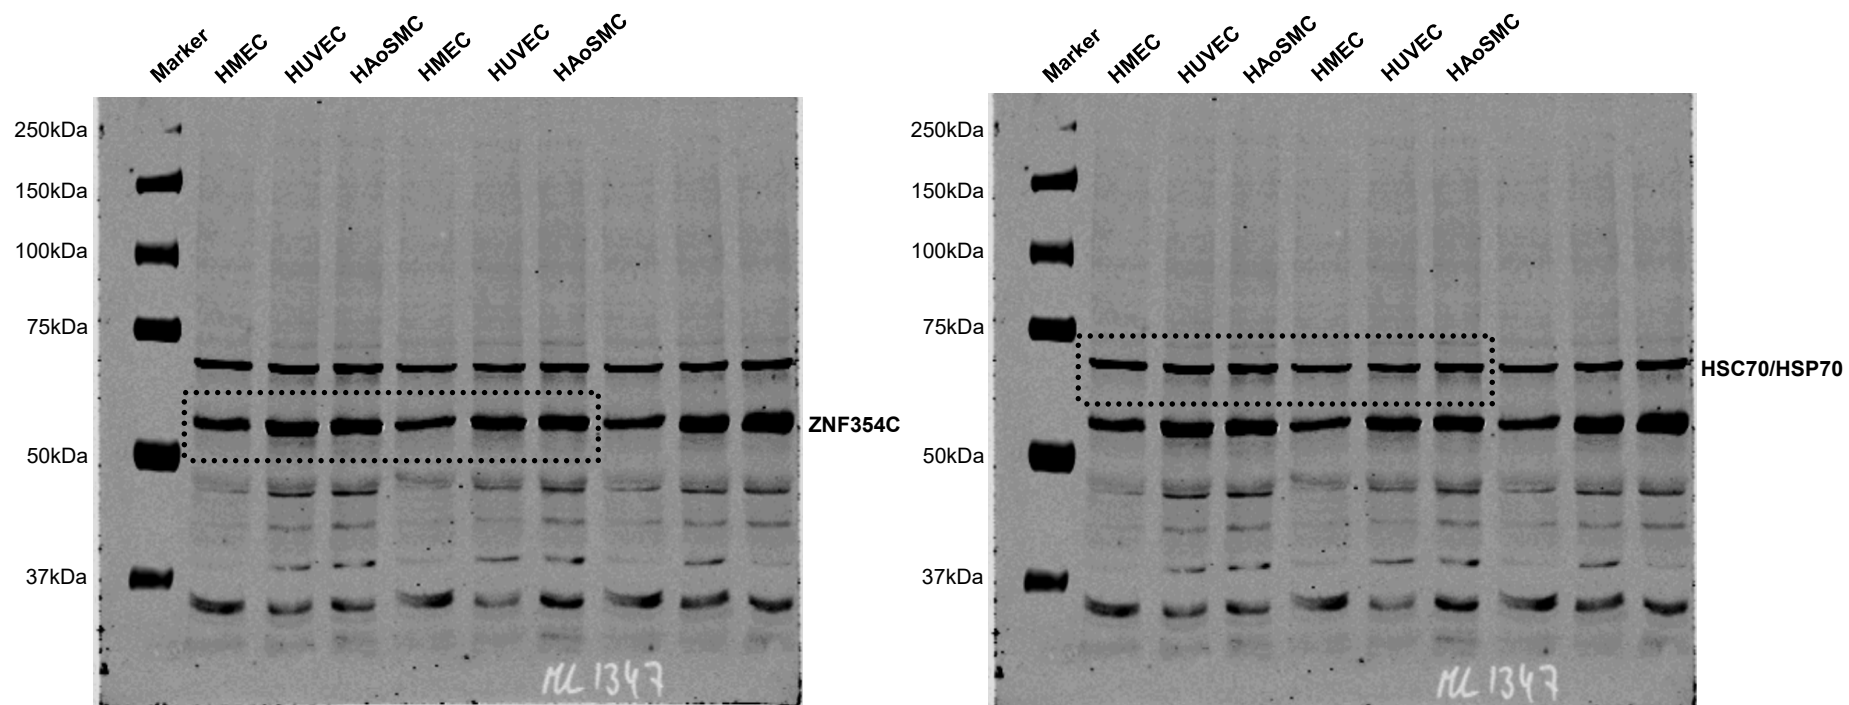

Fig. 1E (Left: HMECs)

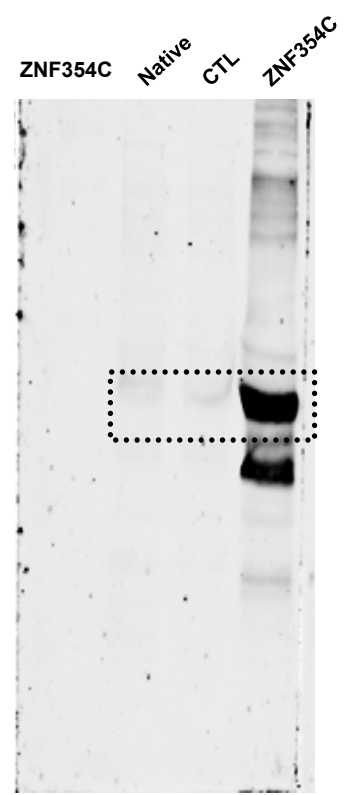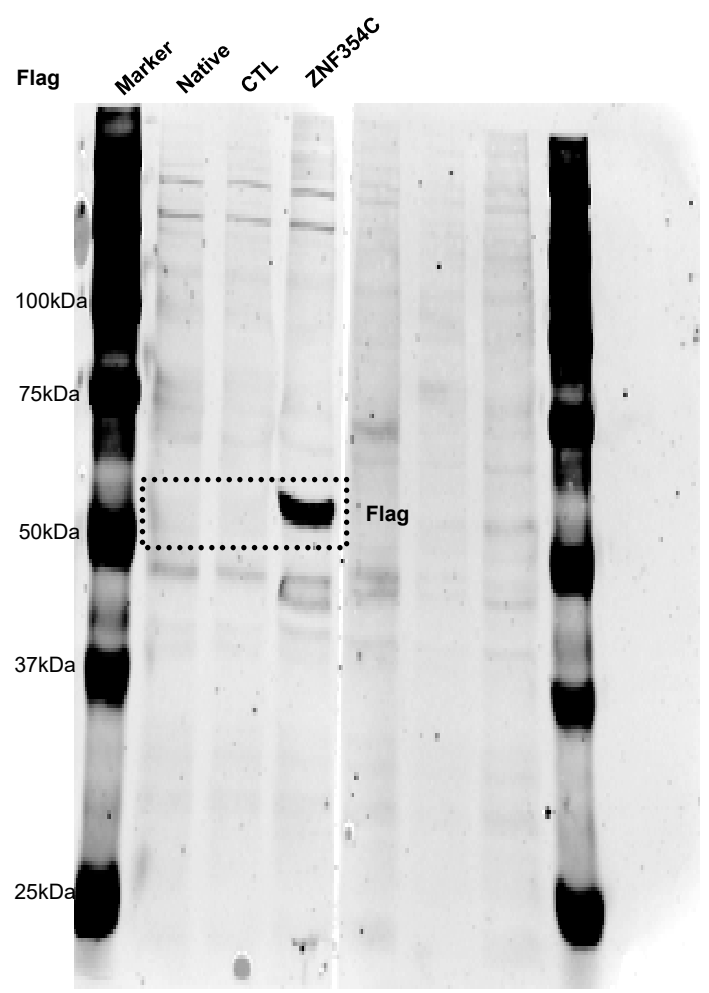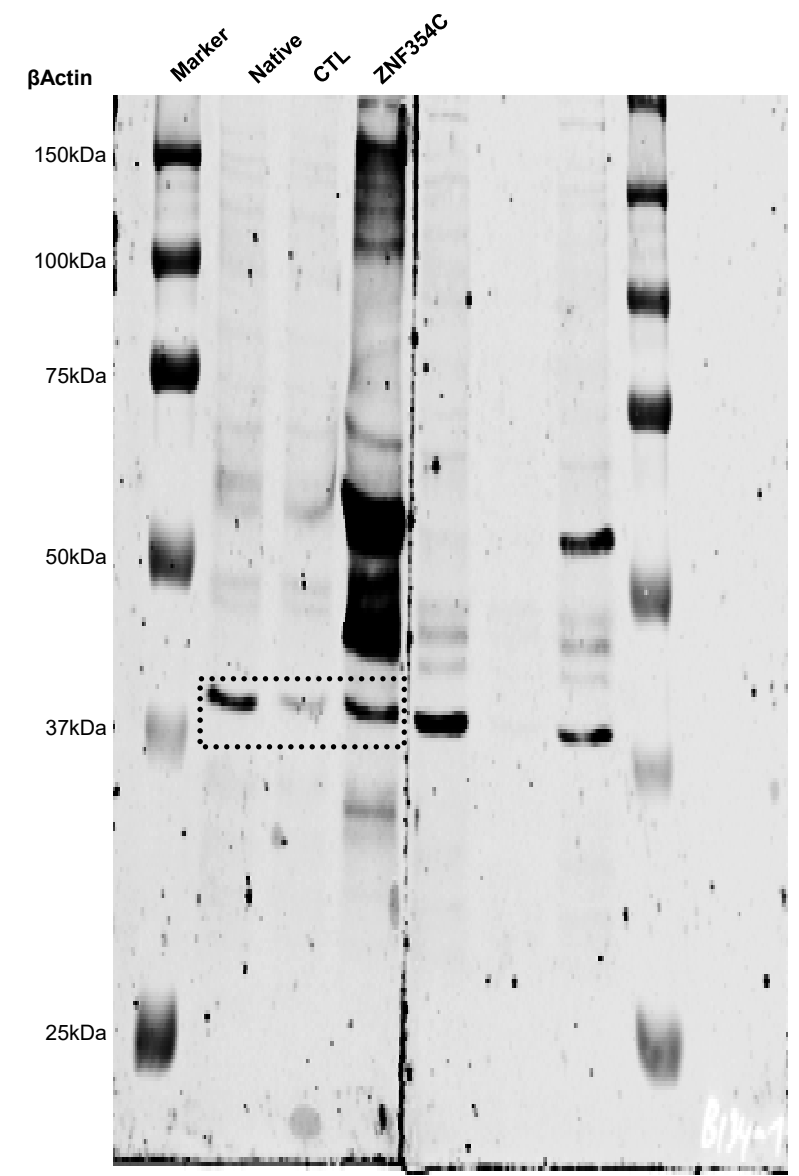

Fig. 1E (Middle: HUVECs)

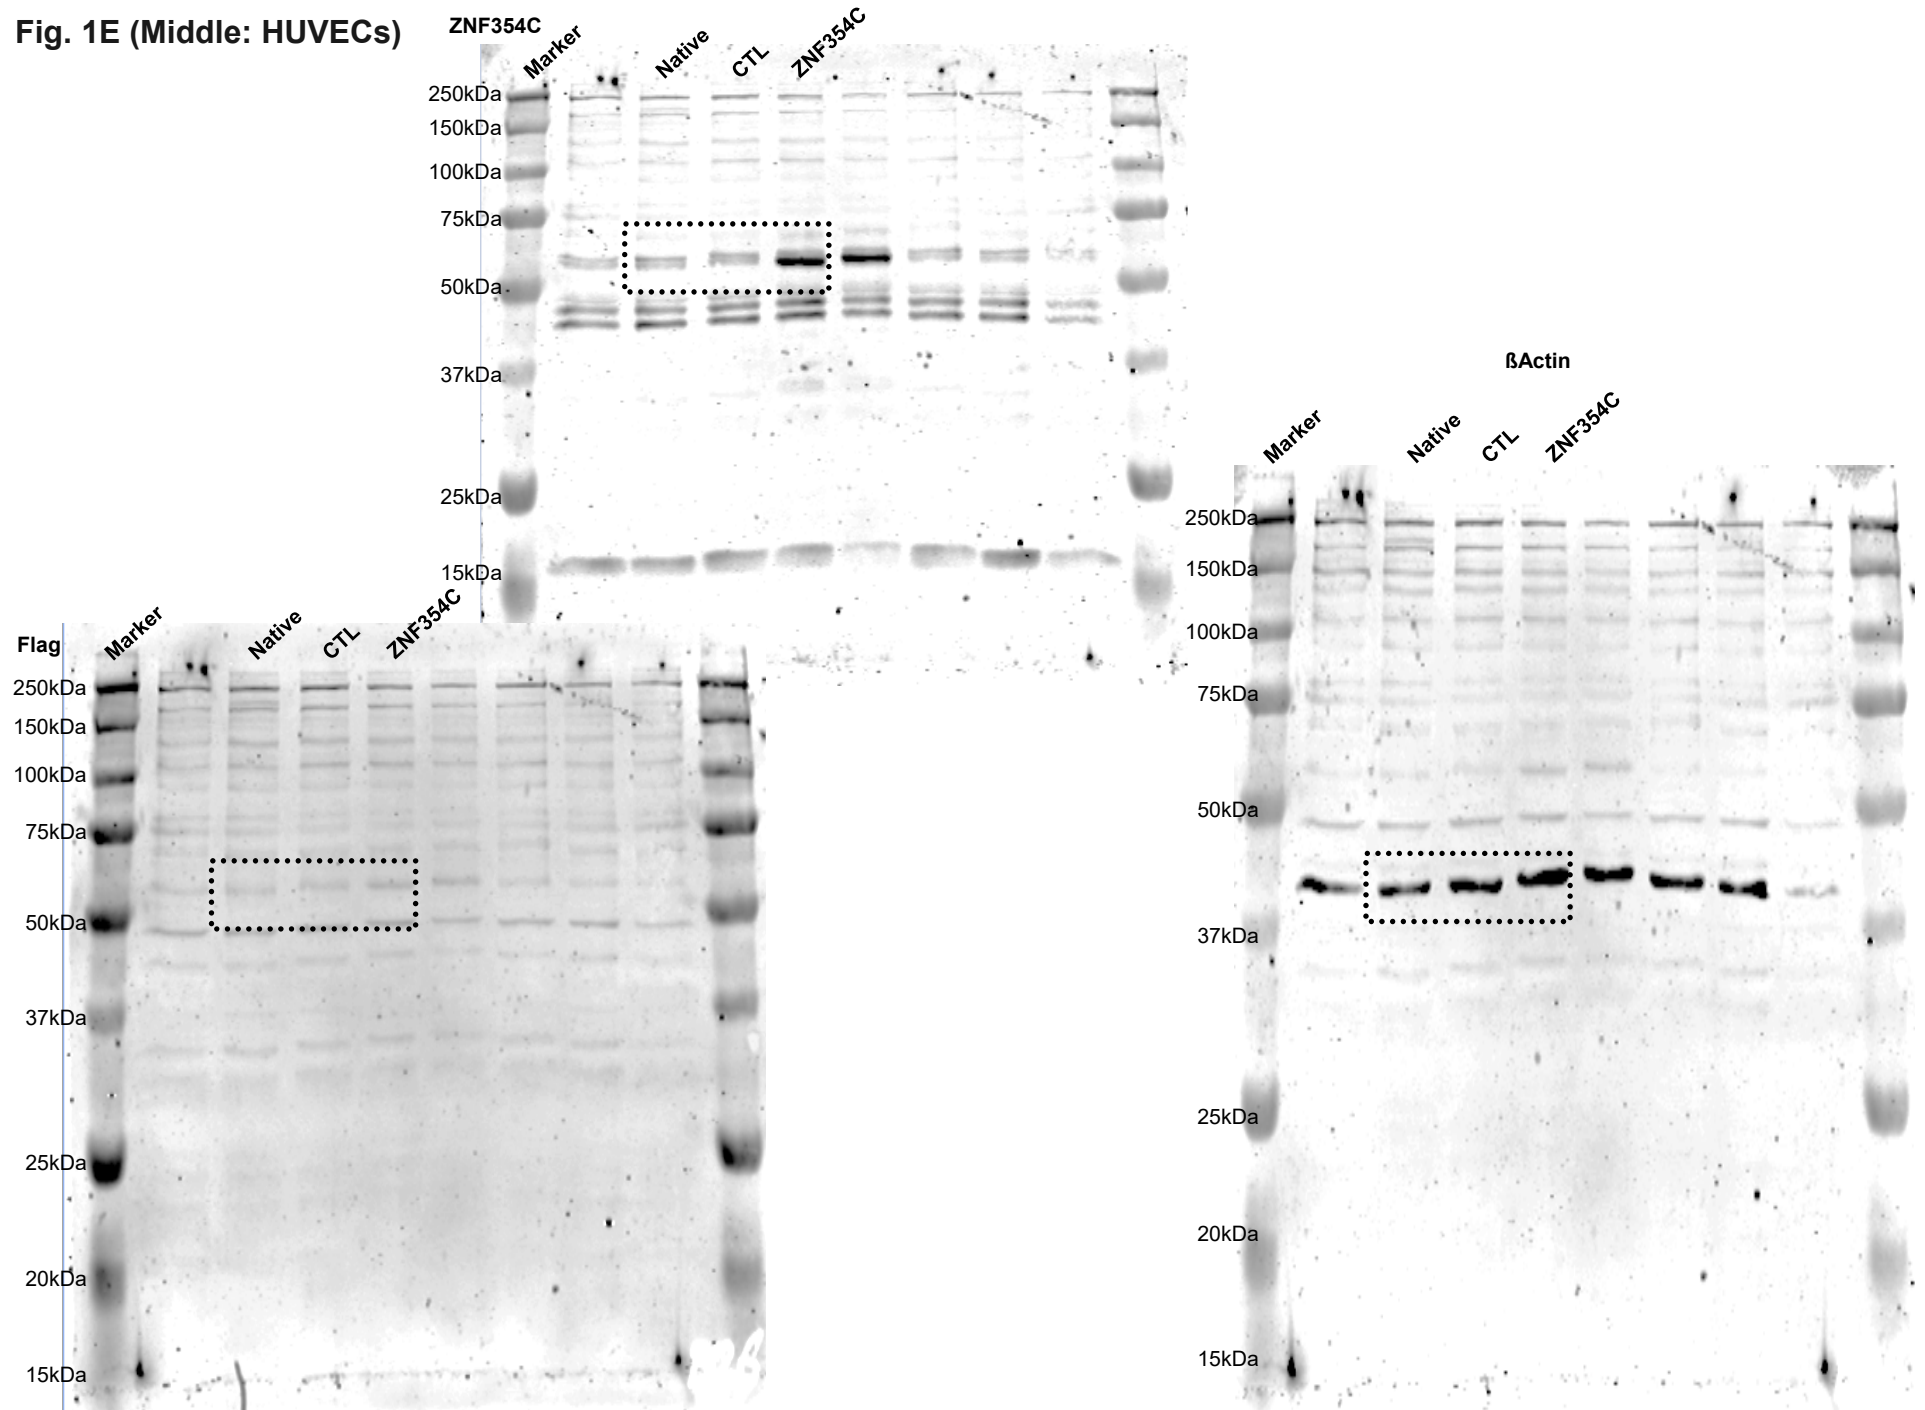

Fig. 1E (Right: HAoSMCs)

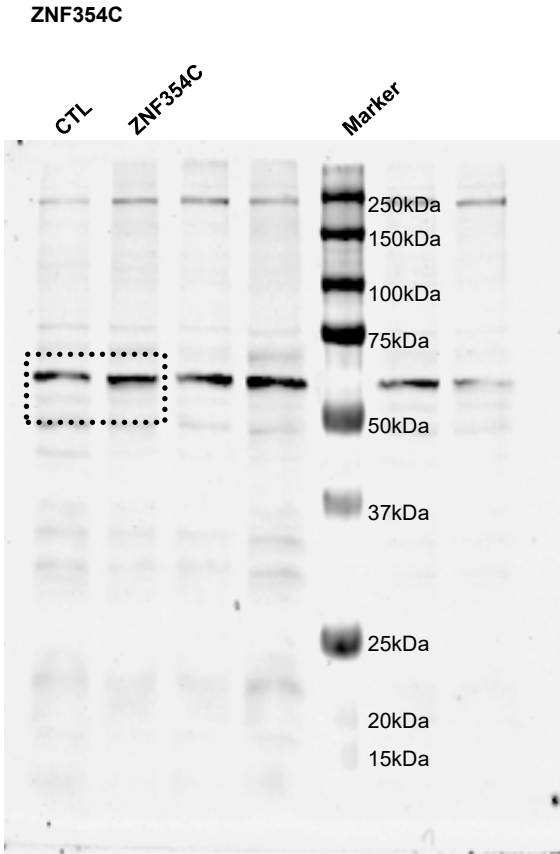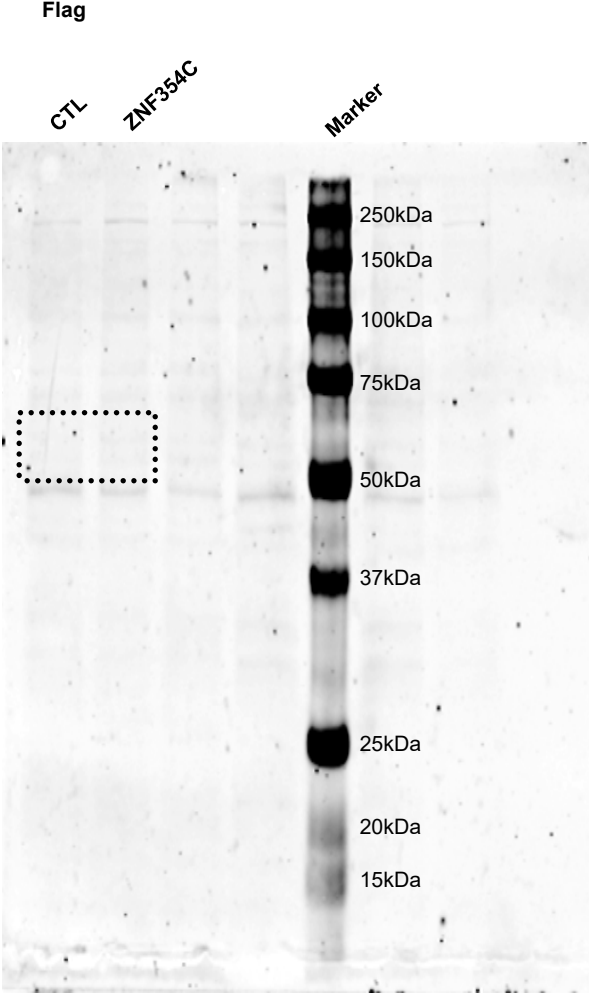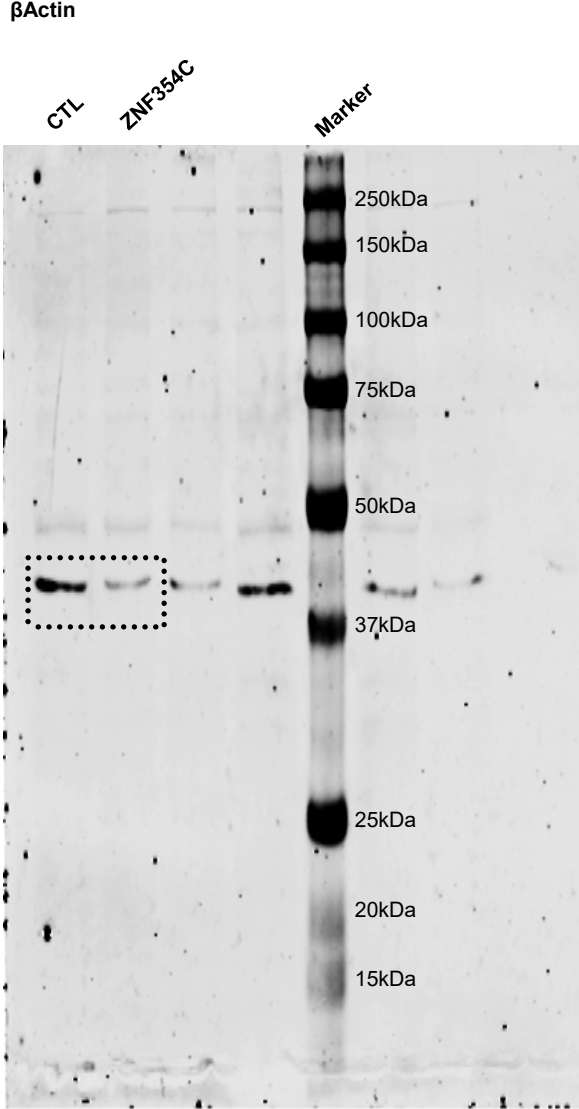



Fig. 3E

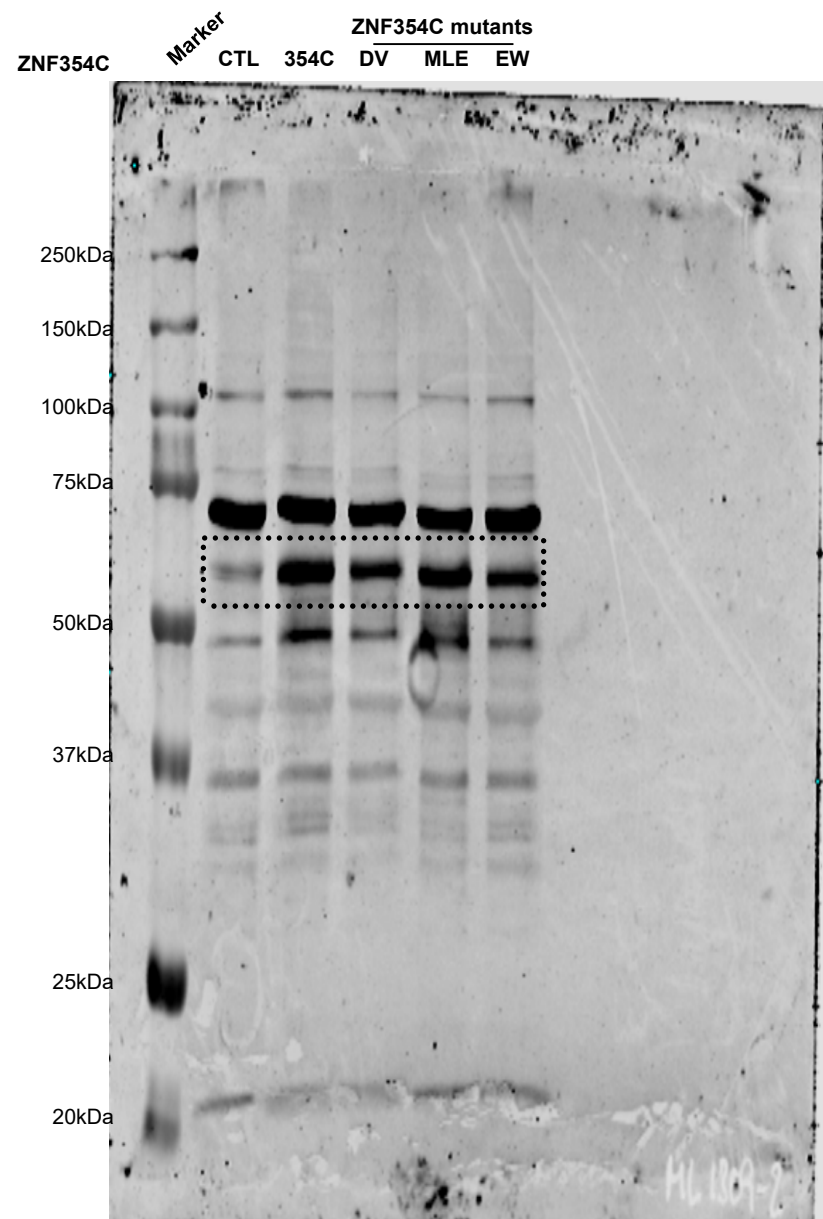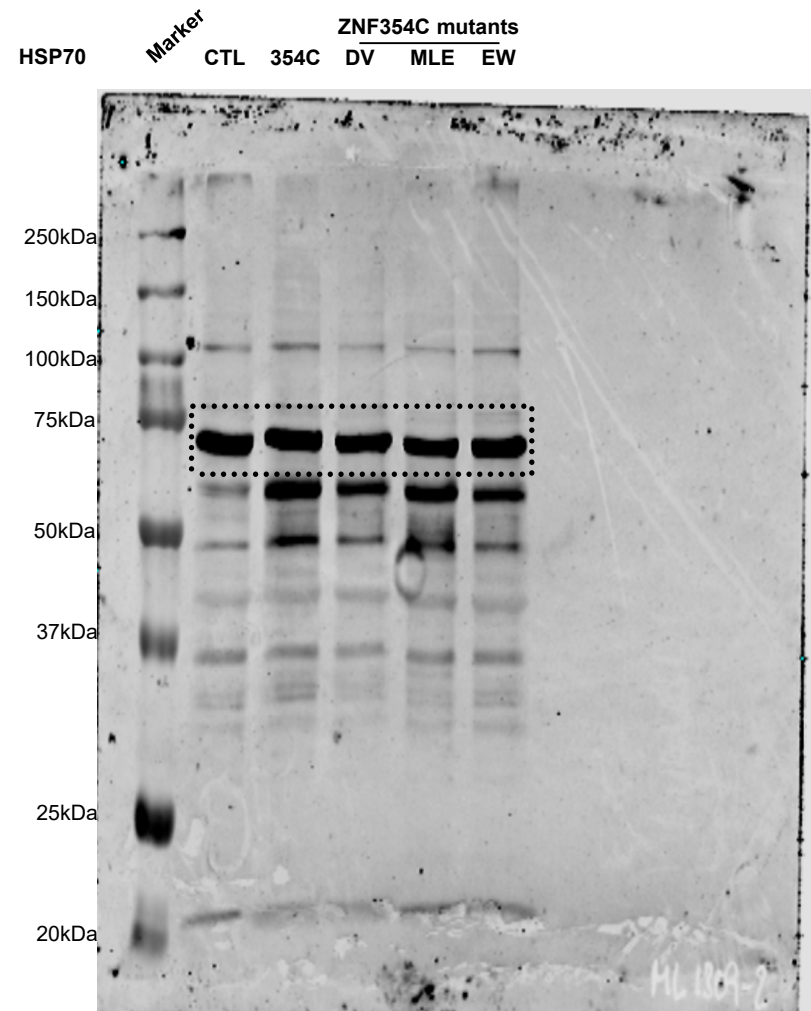

**Fig. 4C**

**IB: ZNF354C**

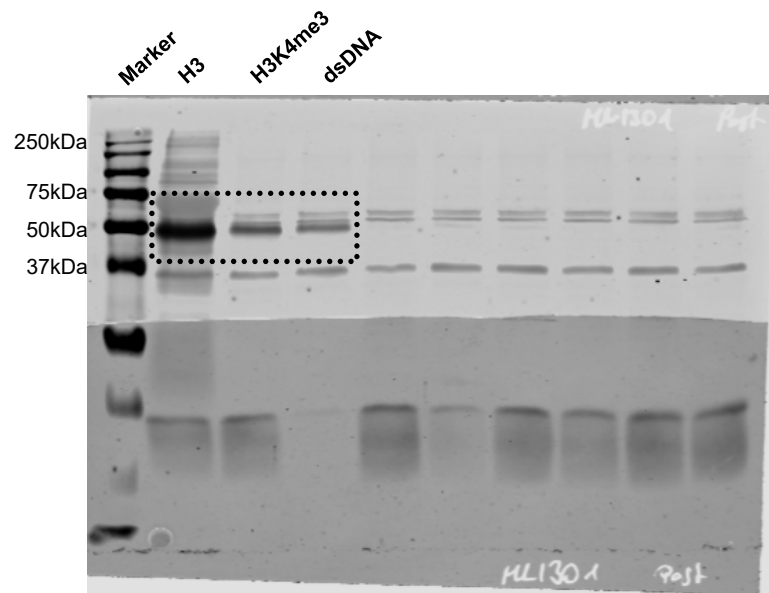

**IB: H3-Pan**

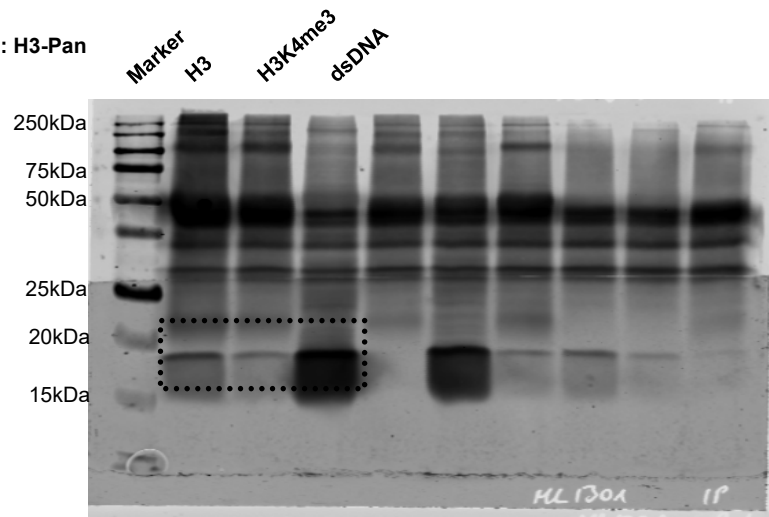

**IB: Topo-I**

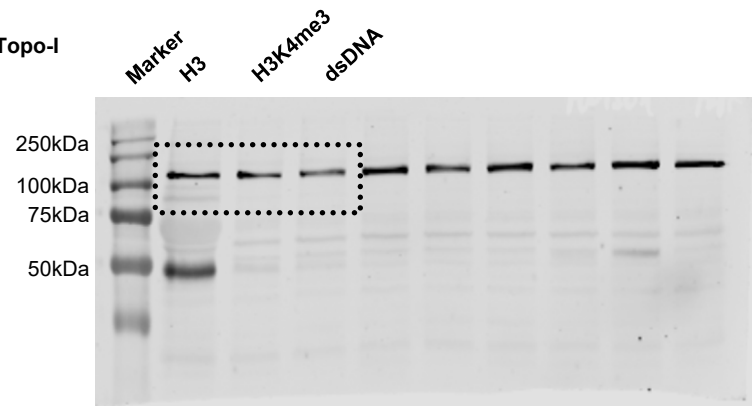

Fig. 5B

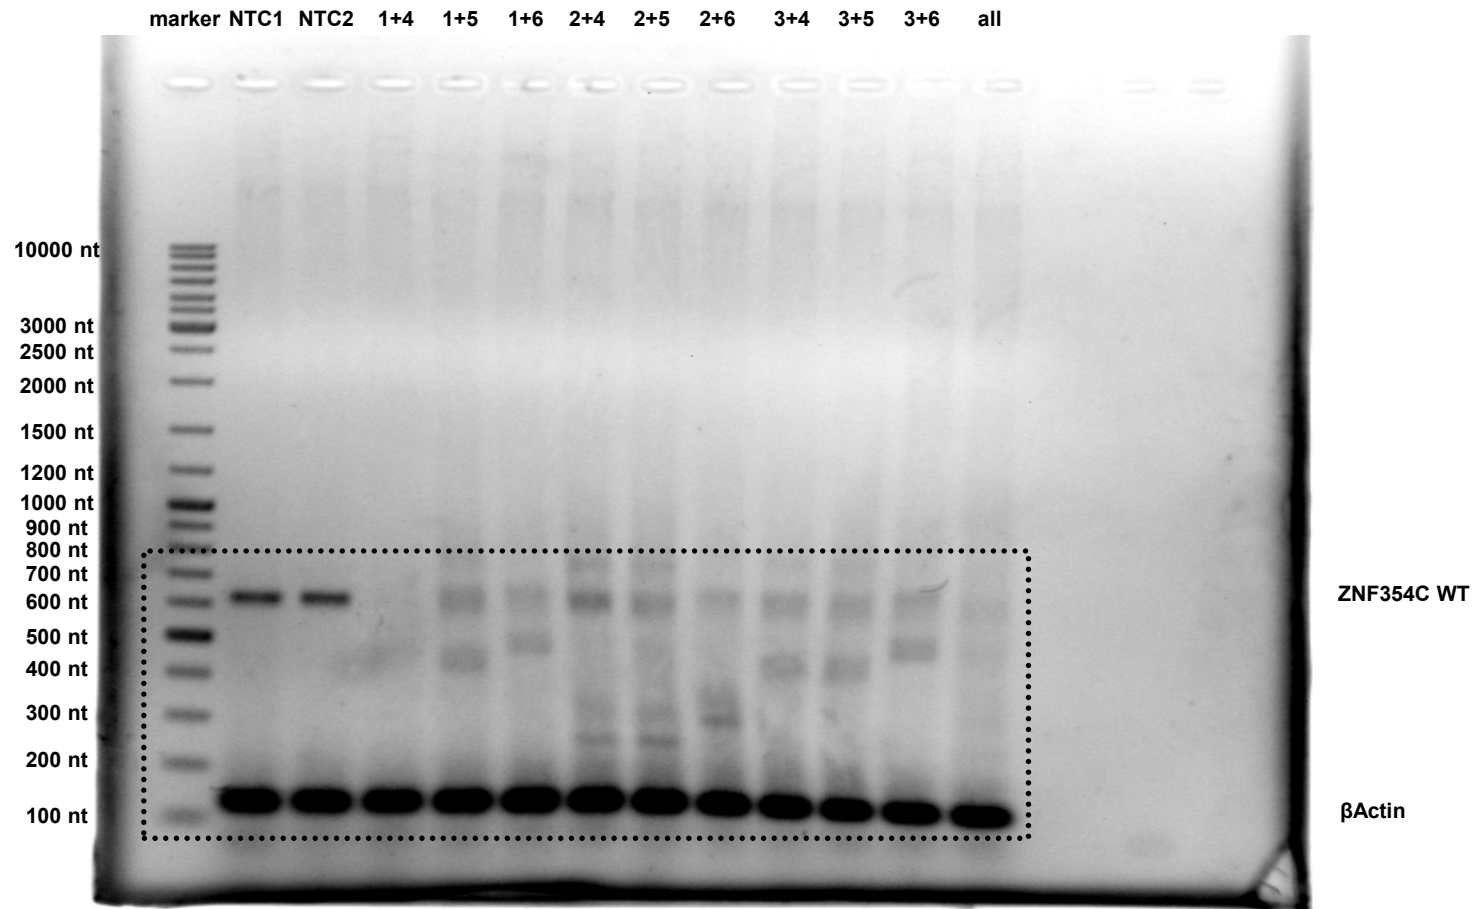

Fig. 5C (Left)

ZNF354C

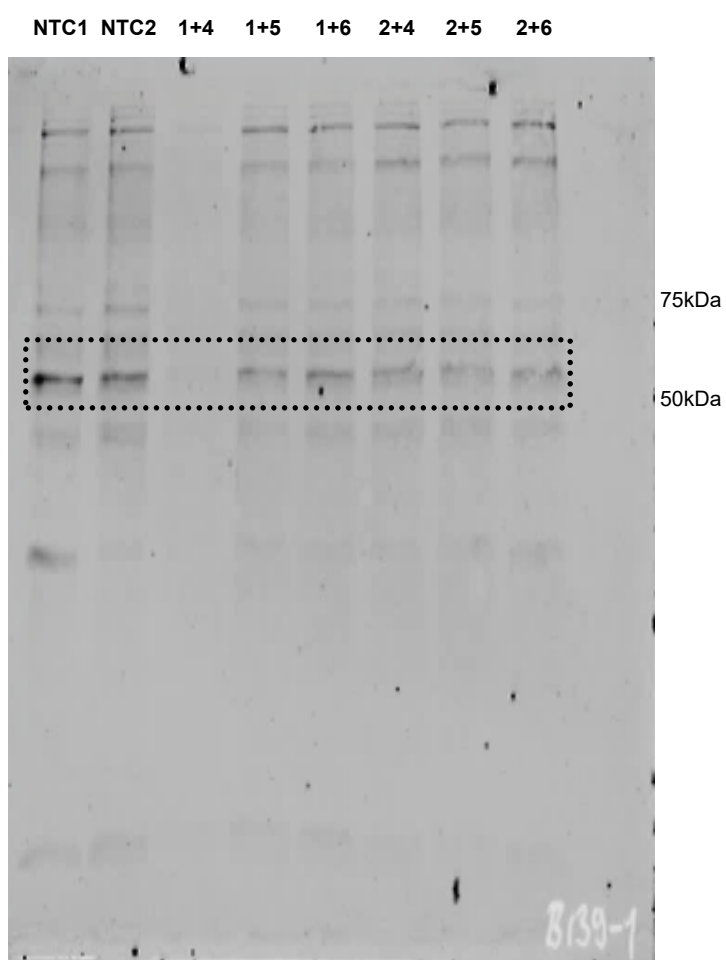

$\beta$ Actin

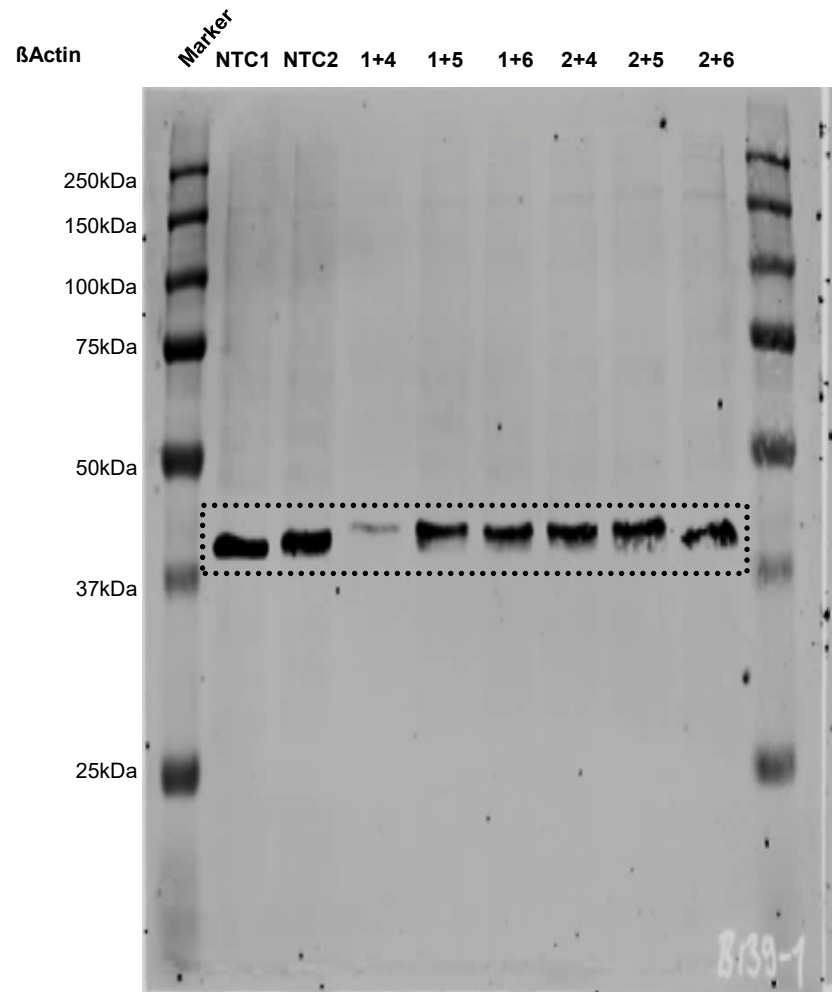

Fig. 5C (Right)

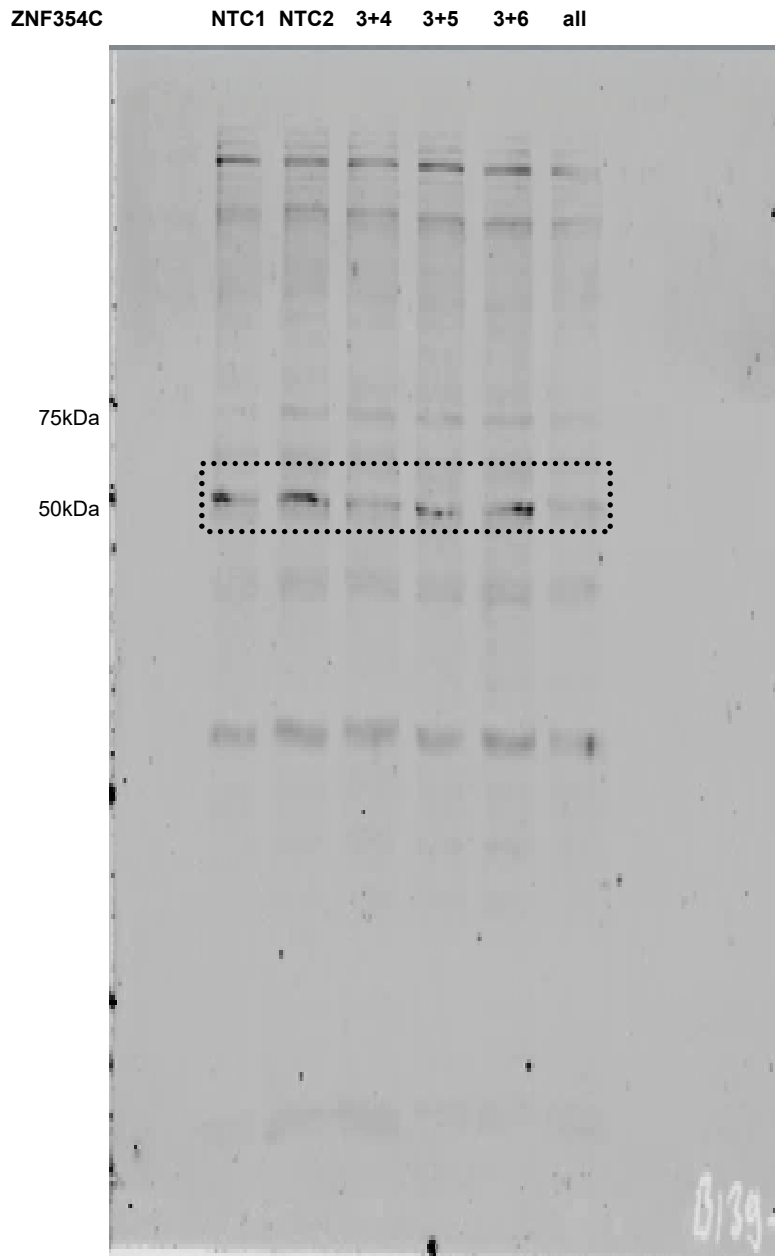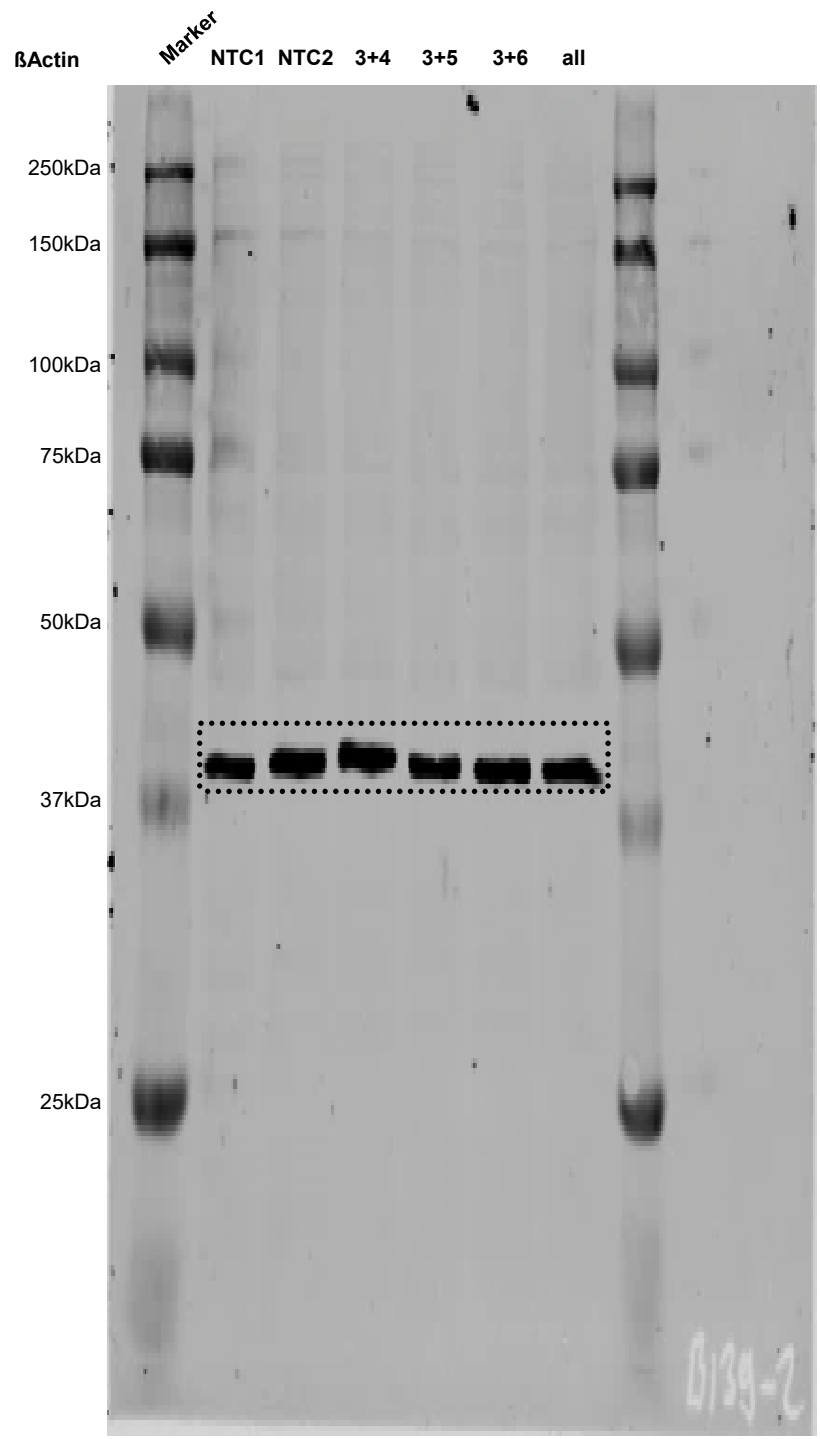

**Fig. 5F**

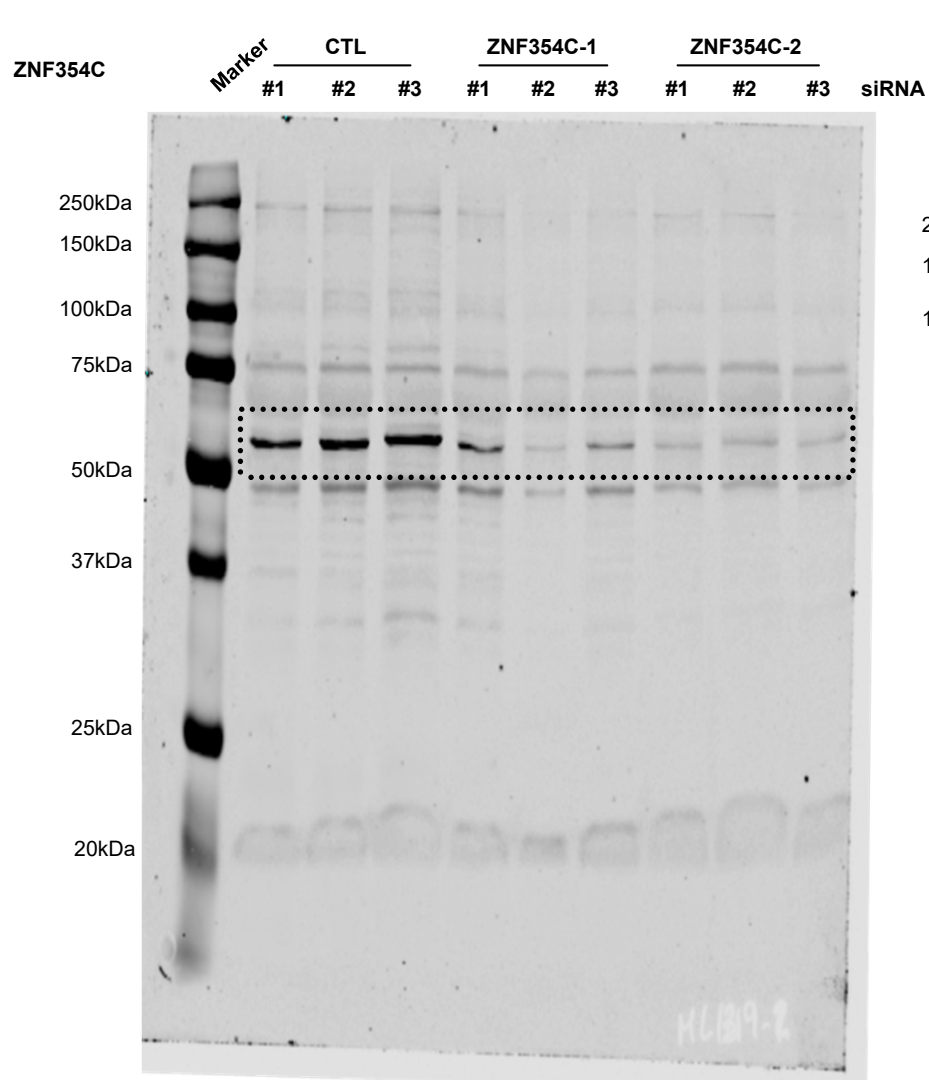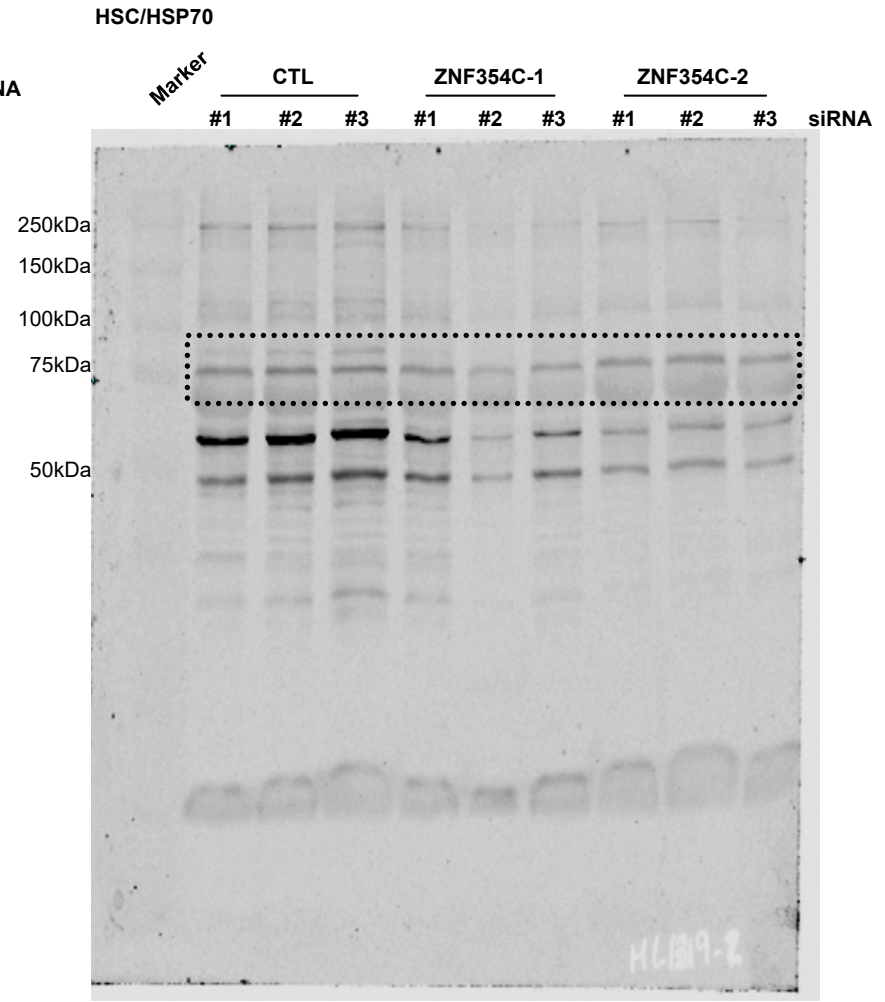

Sup. Fig. 3B

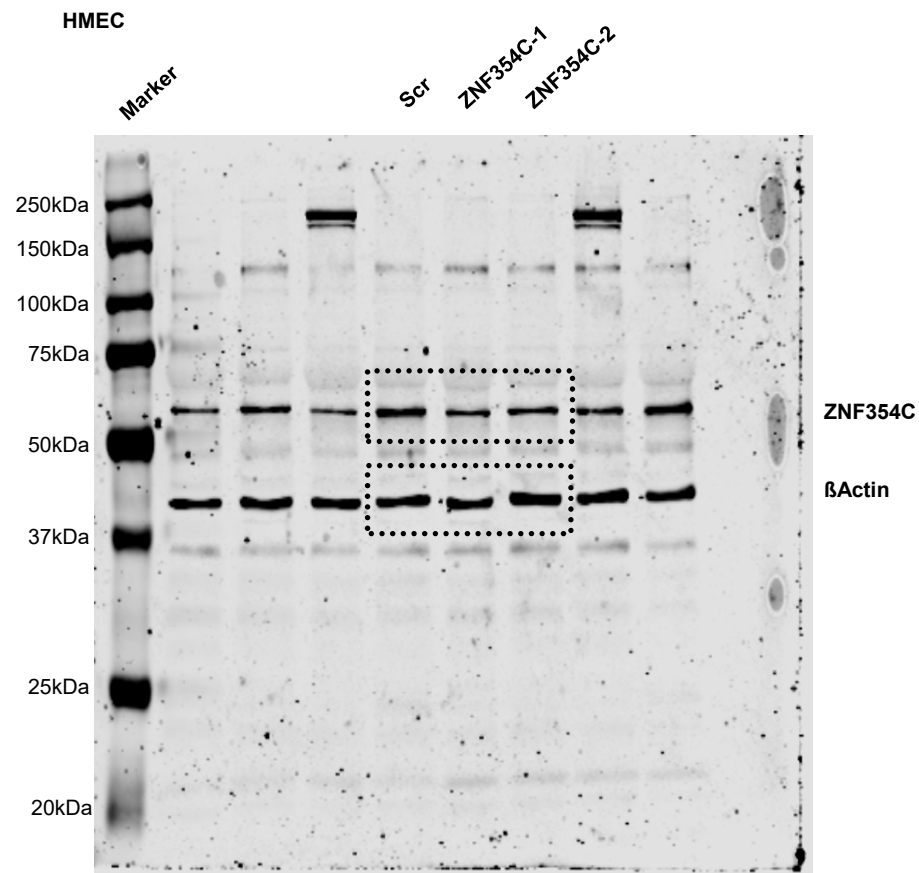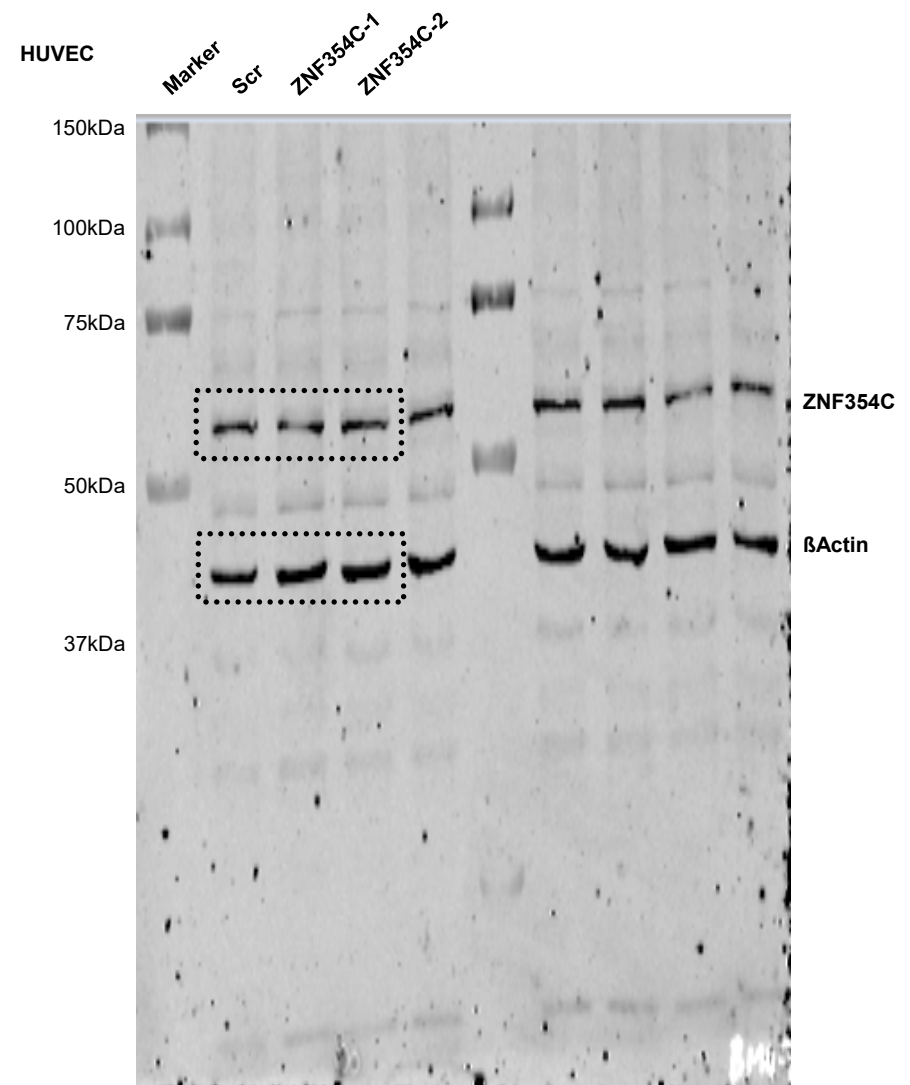

Sup. Fig. 3B: Right HAoSMC

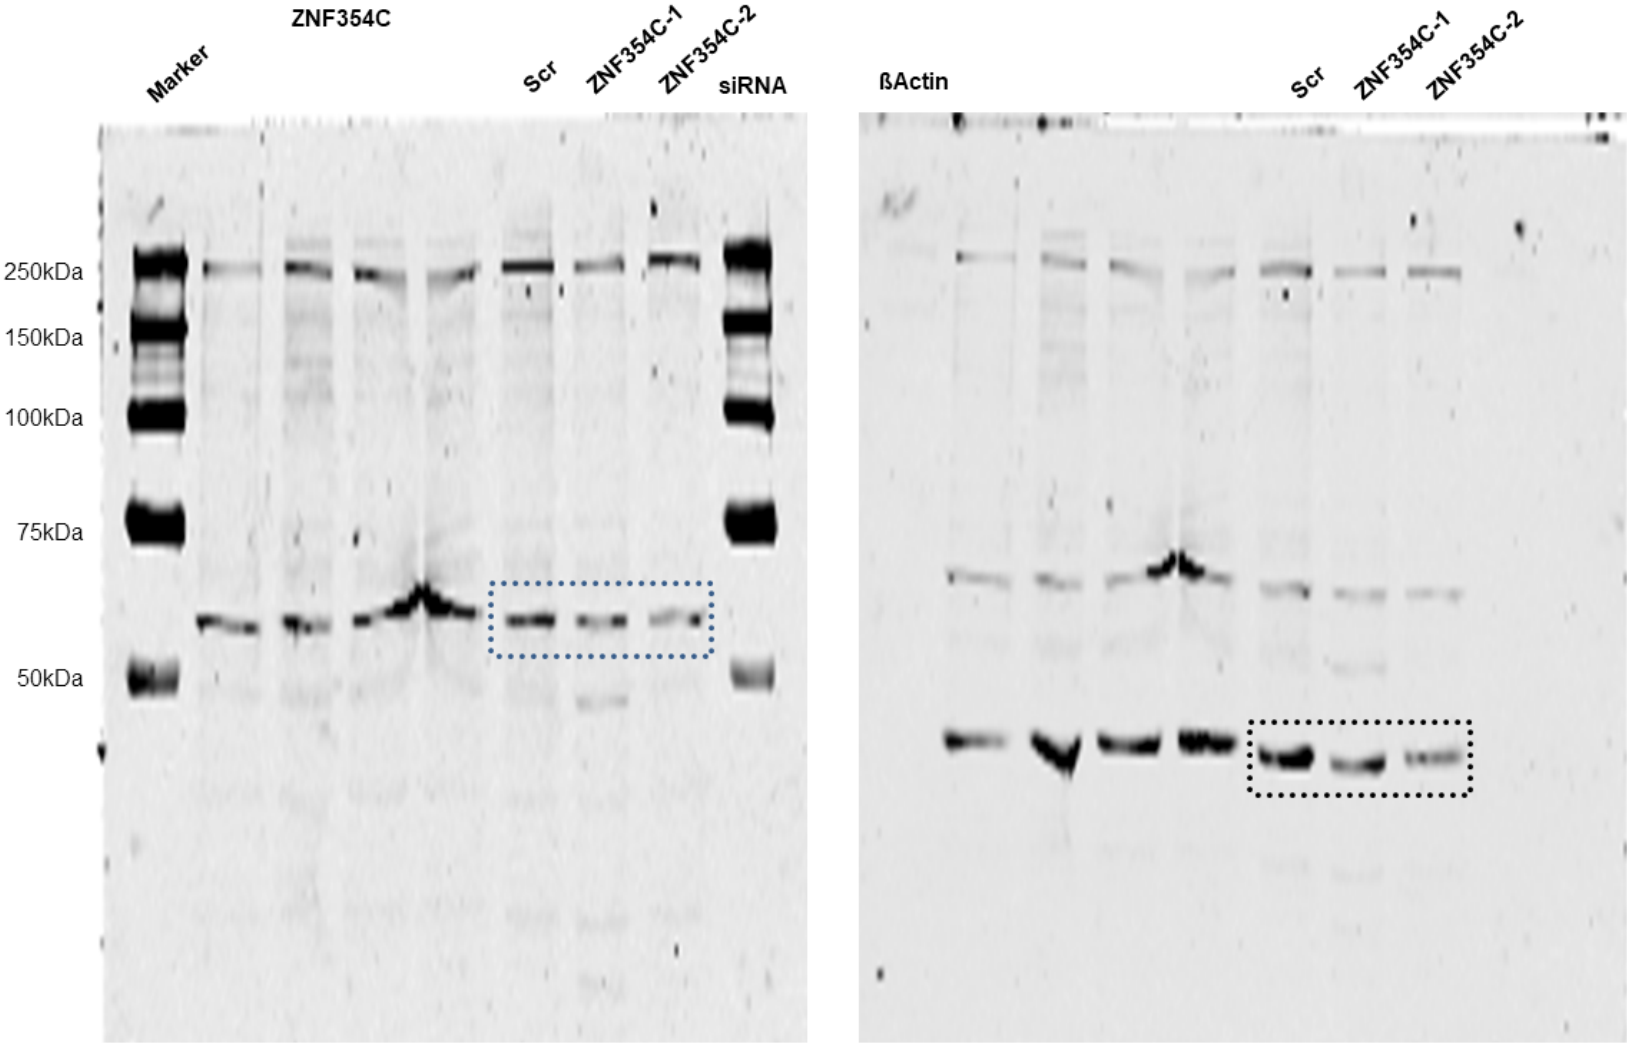



Sup. Fig. 3C

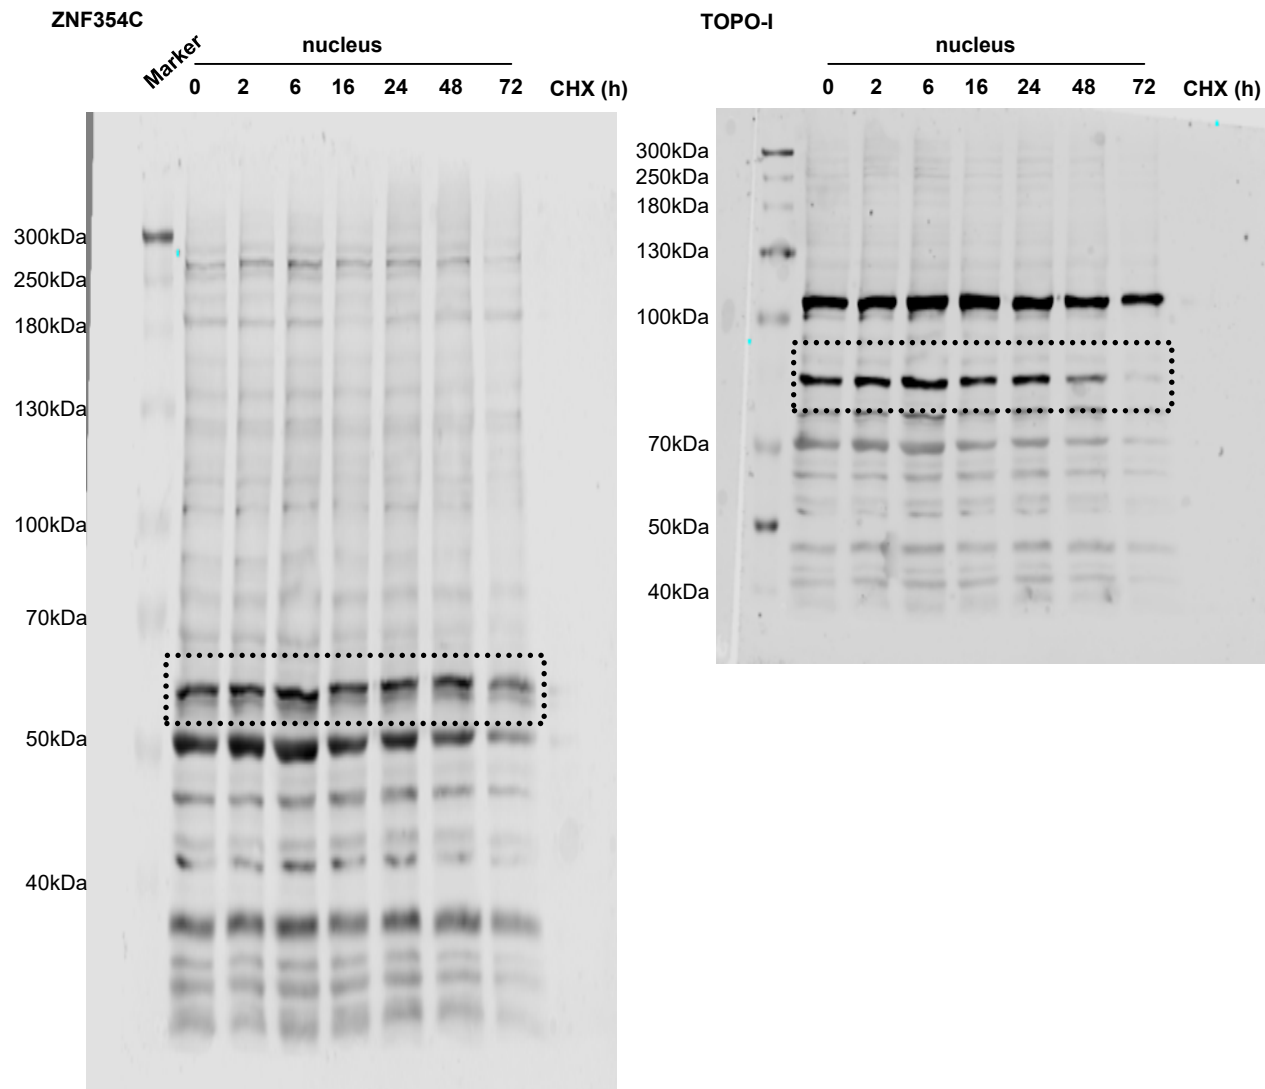

Sup. Fig. 3D

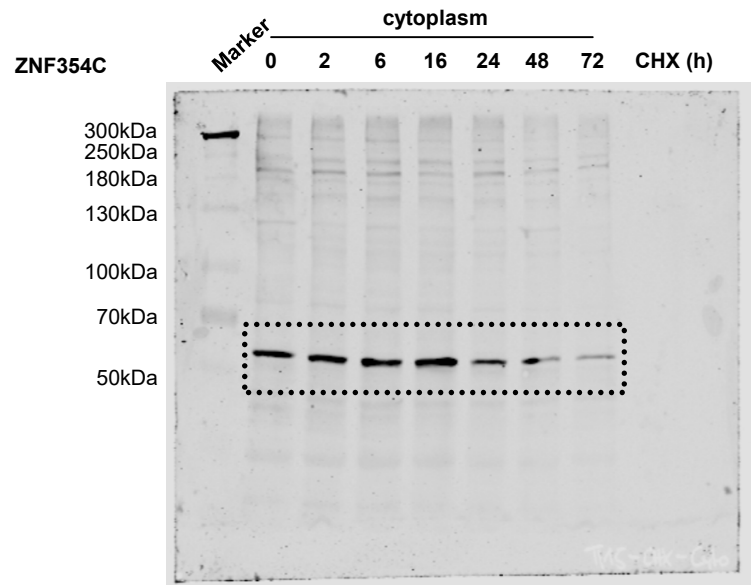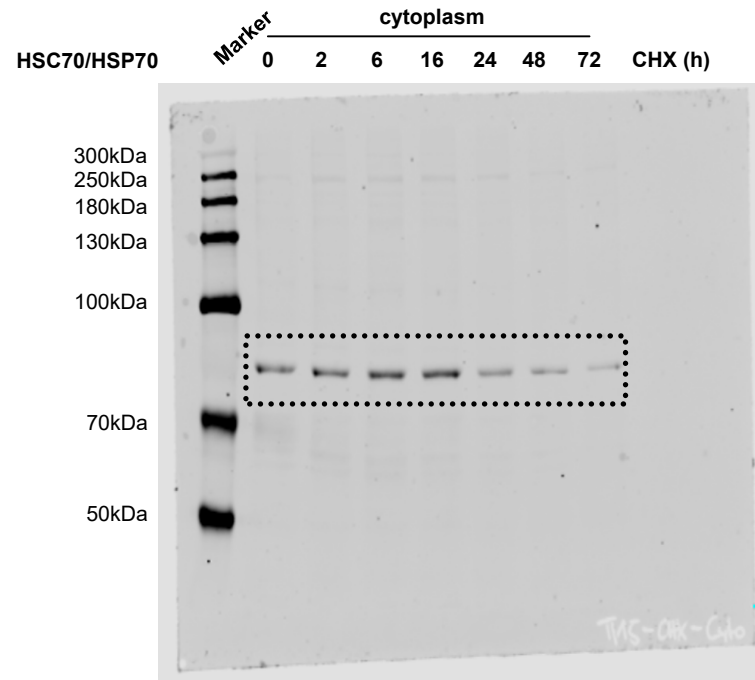

Supplement: MOESM1 [file 41598_2020_76193_MOESM1_ESM.pdf]
