# Supplementary material for: ZNF354C is a transcriptional repressor that inhibits endothelial angiogenic sprouting
Source: Sci Rep. 2020 Nov 5;10:19079. doi: 10.1038/s41598-020-76193-0 (PMC7645770; doi:10.1038/s41598-020-76193-0)
Supplement: Supplementary file 2 — Supplementary Table S1. [file 41598_2020_76193_MOESM2_ESM.xlsx]

## Sheet: Sup. Table 1
Supplementary Table 1: Genes significantly altered in the mRNA-Seq after ZNF354C overexpression in HMECs
Ensembl gene id	Ensembl gene	Ensembl chr	Ensembl start	Ensembl stop	baseMean	baseMeanA ZNF354C	baseMeanB CTRL	log2FoldChange CTRL/ZNF354C	pvalue	padj		diff. Expressed genes:	424
ENSG00000118997	DNAH7	chr2	195737703	196068812	14.9604	4.53294	25.3879	2.25376	4.18357e-06	0.000652444
ENSG00000173805	HAP1	chr17	41717742	41734644	20.1248	6.34681	33.9028	2.24815	4.52449e-07	0.000115944
ENSG00000235927	NEXN-AS1	chr1	77881348	77889539	11.3621	3.42471	19.2996	2.19779	6.68444e-05	0.00509519
ENSG00000174844	DNAH12	chr3	57293699	57544344	19.5014	6.88657	32.1162	2.07006	6.00069e-06	0.000872254
ENSG00000243978	RTL9	chrX	110358816	110456334	14.6494	5.1364	24.1625	2.03581	2.40621e-05	0.00247329
ENSG00000229474	PATL2	chr15	44665732	44711316	28.6772	10.7762	46.5781	2.01442	1.88332e-08	9.12603e-06
ENSG00000196361	ELAVL3	chr19	11451326	11481046	8.20397	2.78675	13.6212	1.94903	0.00117477	0.0408699
ENSG00000103723	AP3B2	chr15	82659281	82709914	14.4649	5.47131	23.4585	1.9182	6.09963e-05	0.00481162
ENSG00000225125	RANP4	chrX	136807223	136807877	8.88221	3.18801	14.5764	1.89503	0.00116112	0.0406032
ENSG00000135423	GLS2	chr12	56470944	56488414	12.4739	4.79884	20.149	1.86675	0.000330835	0.0166251
ENSG00000206561	COLQ	chr3	15450133	15521751	9.52387	3.56007	15.4877	1.85426	0.00131494	0.0443149
ENSG00000214837	LINC01347	chr1	243056307	243101744	14.6864	5.9084	23.4644	1.82426	9.34403e-05	0.00650153
ENSG00000111837	MAK	chr6	10762723	10838555	9.75717	3.8273	15.687	1.78944	0.00147594	0.048371
ENSG00000154451	GBP5	chr1	89258950	89272804	15.1883	6.30701	24.0697	1.77859	0.000137808	0.008577
ENSG00000163884	KLF15	chr3	126342635	126357442	12.4475	5.13375	19.7613	1.75906	0.000485042	0.0210931
ENSG00000182983	ZNF662	chr3	42905731	42917641	10.3076	4.1622	16.4529	1.75741	0.00104902	0.0377379
ENSG00000170959	DCDC1	chr11	30830369	31369810	34.1832	15.1428	53.2236	1.74803	1.39075e-07	4.83838e-05
ENSG00000258708	SLC25A21-AS1	chr14	37171888	37173811	11.812	5.1709	18.4532	1.65645	0.00101682	0.0369838
ENSG00000128342	LIF	chr22	30240447	30246851	23.8499	10.9771	36.7226	1.65515	1.06509e-05	0.00132505
ENSG00000119547	ONECUT2	chr18	57435685	57491297	22.4499	10.3418	34.558	1.64852	1.70495e-05	0.00186894
ENSG00000238105	GOLGA2P5	chr12	100156357	100173659	19.9706	9.1951	30.7461	1.6387	7.68091e-05	0.00566384
ENSG00000148541	FAM13C	chr10	59246129	59363181	20.2807	9.56716	30.9943	1.59823	9.20574e-05	0.00643833
ENSG00000273151	AC073957.3	chr7	879790	886547	14.7085	6.88392	22.5331	1.57771	0.00123729	0.0426081
ENSG00000169248	CXCL11	chr4	76033682	76041415	28.5369	13.9935	43.0804	1.5558	6.42792e-06	0.000891773
ENSG00000197653	DNAH10	chr12	123762188	123936206	28.7615	14.2036	43.3193	1.54352	6.54116e-06	0.000891773
ENSG00000125730	C3	chr19	6677704	6730562	17.4695	8.62084	26.3181	1.50562	0.000412522	0.0190377
ENSG00000245573	BDNF-AS	chr11	27506838	27698174	14.2631	6.97815	21.548	1.49887	0.00122747	0.0423775
ENSG00000259826	AC072061.1	chr7	39947522	39949755	16.5376	8.25275	24.8225	1.48068	0.00074393	0.0294275
ENSG00000175175	PPM1E	chr17	58755869	58985176	19.727	10.1025	29.3515	1.45089	0.000253464	0.0135929
ENSG00000214783	POLR2J4	chr7	43940895	44019175	39.3995	21.0756	57.7235	1.41148	1.10673e-06	0.000234627
ENSG00000158423	RIBC1	chrX	53422690	53431120	19.6065	10.2649	28.9482	1.41064	0.000737727	0.0293533
ENSG00000188659	SAXO2	chr15	82262810	82284930	20.4286	10.7152	30.142	1.41048	0.000460531	0.0204199
ENSG00000077522	ACTN2	chr1	236686454	236764631	31.4852	17.0143	45.9561	1.38217	1.6277e-05	0.00186894
ENSG00000226979	LTA	chr6	31572054	31574324	20.6097	11.0037	30.2158	1.3788	0.000493629	0.0213298
ENSG00000234911	TEX21P	chr14	64341673	64387986	22.6635	12.1517	33.1753	1.3777	0.000182426	0.0103131
ENSG00000214534	ZNF705E	chr11	71814045	71821548	20.4535	11.0103	29.8967	1.36318	0.00041088	0.0190267
ENSG00000137501	SYTL2	chr11	85694224	85811159	36.9612	20.6332	53.2892	1.32742	1.78273e-05	0.00191969
ENSG00000111834	RSPH4A	chr6	116616479	116632985	18.5059	10.1383	26.8734	1.32336	0.00100337	0.0366946
ENSG00000079215	SLC1A3	chr5	36606355	36688334	22.1878	12.4189	31.9566	1.2963	0.000448015	0.020128
ENSG00000152689	RASGRP3	chr2	33436324	33564750	26.1432	14.7659	37.5205	1.28882	0.000195878	0.0109026
ENSG00000164061	BSN	chr3	49554489	49671545	65.1274	37.9991	92.2558	1.25775	1.63984e-08	8.83286e-06
ENSG00000169989	TIGD4	chr4	152769354	152779764	20.6916	11.8115	29.5717	1.25476	0.00103009	0.037171
ENSG00000008300	CELSR3	chr3	48636469	48662915	53.2808	31.0851	75.4764	1.25311	4.52907e-07	0.000115944
ENSG00000115423	DNAH6	chr2	84516455	84819589	39.0731	22.786	55.3602	1.24457	1.71653e-05	0.00186894
ENSG00000139344	AMDHD1	chr12	95943293	95968716	23.8636	13.8262	33.9009	1.23511	0.000498401	0.0214558
ENSG00000243710	CFAP57	chr1	43172149	43254358	78.3793	47.2194	109.539	1.19687	4.05189e-09	3.436e-06
ENSG00000186976	EFCAB6	chr22	43528744	43812337	47.2234	28.5691	65.8777	1.17743	6.84662e-06	0.000910142
ENSG00000197748	CFAP43	chr10	104129888	104232362	78.9283	48.2069	109.65	1.16907	8.91231e-09	5.5163e-06
ENSG00000099251	HSD17B7P2	chr10	38356380	38378505	30.2392	18.2597	42.2187	1.16607	0.000227477	0.0122964
ENSG00000143248	RGS5	chr1	163111121	163321791	96.6554	59.7795	133.531	1.14628	2.05852e-10	2.3275e-07
ENSG00000164125	FAM198B	chr4	158124474	158173318	93.719	57.9988	129.439	1.14462	2.05246e-08	9.60267e-06
ENSG00000152763	WDR78	chr1	66812885	66924887	146.94	91.5287	202.351	1.136	1.63802e-14	5.55617e-11
ENSG00000179859	RNF227	chr17	7913324	7916276	37.2031	22.9943	51.4119	1.1272	9.59393e-05	0.00660763
ENSG00000139537	CCDC65	chr12	48904110	48931840	26.1651	16.075	36.2552	1.12555	0.00122524	0.0423775
ENSG00000164309	CMYA5	chr5	79689877	79800240	53.8312	33.5304	74.1321	1.12156	6.90924e-06	0.000910142
ENSG00000256625	AC092747.2	chr12	27121910	27147664	30.8338	19.2665	42.401	1.09863	0.000675436	0.0275205
ENSG00000168026	TTC21A	chr3	39107704	39138903	61.4833	38.7995	84.1672	1.09755	9.02143e-07	0.00020066
ENSG00000257335	MGAM	chr7	141907813	142106747	71.8144	45.5109	98.1179	1.09158	8.45198e-07	0.00019435
ENSG00000116183	PAPPA2	chr1	176463171	176845605	75.1018	47.8035	102.4	1.08318	2.52079e-07	7.43523e-05
ENSG00000146856	AGBL3	chr7	134986508	135147963	50.2021	31.958	68.4463	1.07527	1.38498e-05	0.00163404
ENSG00000257176	AC009318.1	chr12	29280418	29317848	56.0331	35.7433	76.3228	1.07341	1.48914e-05	0.00174178
ENSG00000186952	TMEM232	chr5	110289233	110738956	27.6798	17.554	37.8056	1.06454	0.00118118	0.0409878
ENSG00000102385	DRP2	chrX	101219769	101264497	70.4883	45.2715	95.7051	1.06347	1.26e-06	0.000251406
ENSG00000187860	CCDC157	chr22	30356635	30378658	86.4216	55.7593	117.084	1.05688	4.52231e-08	1.70441e-05
ENSG00000148225	WDR31	chr9	113313222	113340298	98.9077	64.1726	133.643	1.0468	4.35006e-09	3.47186e-06
ENSG00000049769	PPP1R3F	chrX	49269843	49301461	38.1687	24.6343	51.703	1.03981	0.000213307	0.01167
ENSG00000274180	NATD1	chr17	21238870	21253410	42.1711	27.4543	56.8879	1.02462	0.00012541	0.00798857
ENSG00000204815	TTC25	chr17	41930635	41965651	41.8027	27.2919	56.3136	1.01849	0.000212512	0.01167
ENSG00000186666	BCDIN3D	chr12	49836039	49843129	69.2574	45.4405	93.0742	1.01841	1.97346e-06	0.000366792
ENSG00000232040	ZBED9	chr6	28570535	28616212	36.0773	24.0282	48.1263	0.972939	0.000943109	0.035251
ENSG00000280239	AC011498.7	chr19	4448810	4450836	73.6549	49.4696	97.8402	0.969684	4.45888e-06	0.000682528
ENSG00000177595	PIDD1	chr11	799179	809753	57.6793	38.731	76.6276	0.966307	7.55332e-05	0.00560019
ENSG00000186409	CCDC30	chr1	42463330	42654664	59.8913	40.3798	79.4028	0.958319	4.30132e-05	0.00367046
ENSG00000163617	CCDC191	chr3	113964137	114056613	51.8186	34.9111	68.7262	0.957269	8.05743e-05	0.005863
ENSG00000155085	AK9	chr6	109492856	109691217	163.428	110.818	216.039	0.956804	4.95254e-11	6.71961e-08
ENSG00000234684	SDCBP2-AS1	chr20	1325405	1378734	64.8907	43.9014	85.8801	0.952267	1.19674e-05	0.00145389
ENSG00000104856	RELB	chr19	45001430	45038198	68.5074	46.4182	90.5965	0.949851	6.04303e-06	0.000872254
ENSG00000240291	AL450384.2	chr10	18513115	18545651	36.8936	24.9069	48.8802	0.945134	0.000815947	0.0315406
ENSG00000171962	DRC3	chr17	17972813	18016889	68.0441	46.2505	89.8377	0.942961	1.07426e-05	0.00132505
ENSG00000130997	POLN	chr4	2071918	2242121	60.2386	41.0045	79.4728	0.937957	6.01213e-05	0.00480999
ENSG00000103599	IQCH	chr15	67254800	67502260	115.433	79.2058	151.659	0.928538	1.45675e-08	8.23549e-06
ENSG00000166436	TRIM66	chr11	8612037	8682694	59.6437	40.8195	78.468	0.926197	4.20527e-05	0.00361121
ENSG00000267858	MZF1-AS1	chr19	58559129	58574797	85.3217	58.5603	112.083	0.924959	7.93777e-06	0.00103557
ENSG00000185261	KIAA0825	chr5	94152966	94618597	79.011	54.4714	103.551	0.914385	3.38301e-06	0.000546437
ENSG00000122477	LRRC39	chr1	100148449	100178273	48.3613	33.5113	63.2114	0.895762	0.000563452	0.023742
ENSG00000206530	CFAP44	chr3	113286947	113441610	39.7399	27.5914	51.8883	0.887365	0.00139053	0.045793
ENSG00000248008	NRAV	chr12	120490328	120495940	104.267	72.9691	135.566	0.884601	3.64262e-07	9.88463e-05
ENSG00000163491	NEK10	chr3	27110085	27369460	48.9624	34.1312	63.7936	0.8831	0.000502871	0.0214558
ENSG00000181016	LSMEM1	chr7	112480853	112491062	57.4148	40.444	74.3855	0.863126	0.000385202	0.0181473
ENSG00000183666	GUSBP1	chr5	21341833	21589372	130.41	92.2627	168.558	0.862404	2.31929e-08	1.04894e-05
ENSG00000251136	AF117829.1	chr8	89609409	89757727	65.3674	46.1855	84.5492	0.858411	6.06212e-05	0.00480999
ENSG00000237036	ZEB1-AS1	chr10	31206278	31320447	60.6692	42.9643	78.3741	0.852335	0.000117204	0.00771952
ENSG00000133640	LRRIQ1	chr12	85036314	85264457	45.1193	31.9859	58.2527	0.845033	0.00106076	0.0379745
ENSG00000005189	REXO5	chr16	20806429	20849668	168.333	120.349	216.316	0.84063	1.75772e-08	8.83286e-06
ENSG00000259768	AC004943.2	chr16	72665170	72791624	61.1592	43.5961	78.7222	0.838062	0.000266401	0.0141746
ENSG00000212916	MAP10	chr1	232804892	232808407	50.222	36.0419	64.4022	0.820179	0.000923722	0.0347176
ENSG00000169621	APLF	chr2	68467561	68655862	100.165	72.367	127.962	0.813748	5.55906e-06	0.00081984
ENSG00000110318	CEP126	chr11	101915015	102001058	94.7817	68.6955	120.868	0.806181	1.20014e-05	0.00145389
ENSG00000104381	GDAP1	chr8	74321130	74488872	162.974	118.691	207.258	0.799062	6.10542e-09	4.35991e-06
ENSG00000220323	HIST2H2BD	chr1	149842875	149846486	51.6484	37.4519	65.8449	0.797762	0.000973541	0.0357968
ENSG00000129295	LRRC6	chr8	132571953	132675617	78.1862	56.9657	99.4067	0.792583	5.89251e-05	0.00475891
ENSG00000116151	MORN1	chr1	2321253	2391707	70.704	51.5711	89.837	0.789011	0.00037088	0.0179078
ENSG00000055163	CYFIP2	chr5	157266079	157395595	103.583	75.7585	131.408	0.786592	9.33258e-06	0.00118341
ENSG00000261716	HIST2H2BC	chr1	149844498	149850937	109.929	80.6848	139.173	0.779066	2.59372e-06	0.000445463
ENSG00000180787	ZFP3	chr17	5078248	5096374	137.767	102.309	173.225	0.753989	3.37856e-07	9.35516e-05
ENSG00000180998	GPR137C	chr14	52553148	52637713	92.0209	68.2531	115.789	0.753952	6.82513e-05	0.00517337
ENSG00000119636	BBOF1	chr14	74019353	74082863	118.581	88.3964	148.765	0.744412	6.21386e-06	0.000878225
ENSG00000183647	ZNF530	chr19	57599885	57612722	72.4836	54.1065	90.8608	0.737227	0.000329118	0.0166003
ENSG00000126368	NR1D1	chr17	40092787	40100725	88.2421	66.0666	110.418	0.73231	8.28392e-05	0.00594689
ENSG00000181035	SLC25A42	chr19	19063999	19112888	76.5493	57.3033	95.7952	0.731359	0.000236368	0.0127264
ENSG00000083817	ZNF416	chr19	57571566	57578927	69.7713	52.2351	87.3076	0.730161	0.000898378	0.0341434
ENSG00000134326	CMPK2	chr2	6840570	6866635	87.9456	66.0427	109.848	0.725434	0.000165018	0.00968257
ENSG00000162174	ASRGL1	chr11	62337448	62393412	75.7932	56.9238	94.6626	0.7238	0.000277751	0.0146067
ENSG00000159388	BTG2	chr1	203305491	203309602	151.568	114.46	188.677	0.716153	4.64275e-07	0.000116653
ENSG00000204923	FBXO48	chr2	68459419	68467258	83.8927	63.2706	104.515	0.715215	0.000149351	0.00900619
ENSG00000133624	ZNF767P	chr7	149547154	149624752	120.182	90.8151	149.548	0.713422	1.70598e-05	0.00186894
ENSG00000188177	ZC3H6	chr2	112275594	112340063	358.885	274.602	443.169	0.688525	7.17578e-13	1.39087e-09
ENSG00000106804	C5	chr9	120952335	121050276	105.057	80.3158	129.797	0.685723	6.46161e-05	0.00498131
ENSG00000179532	DNHD1	chr11	6497260	6593758	193.696	148.693	238.699	0.679218	1.6153e-07	5.4791e-05
ENSG00000160766	GBAP1	chr1	155213821	155227422	74.8568	57.5599	92.1537	0.669699	0.000867094	0.0332337
ENSG00000251192	ZNF674	chrX	46497727	46545457	80.4711	61.9615	98.9807	0.66718	0.000691048	0.0278224
ENSG00000116885	OSCP1	chr1	36415827	36450451	75.9057	58.735	93.0765	0.655258	0.00115949	0.0406032
ENSG00000239883	PARGP1	chr10	45854093	45972154	91.8954	71.1964	112.594	0.653893	0.000286261	0.0149384
ENSG00000197841	ZNF181	chr19	34734155	34745378	124.01	96.197	151.824	0.652885	2.81775e-05	0.0027906
ENSG00000105792	CFAP69	chr7	90245174	90311063	86.7582	67.2934	106.223	0.650794	0.000582296	0.02446
ENSG00000085644	ZNF213	chr16	3129777	3142805	142.661	110.857	174.466	0.649536	8.44753e-06	0.00109158
ENSG00000186638	KIF24	chr9	34252381	34311371	667.781	520.224	815.337	0.647259	1.18891e-21	8.06559e-18
ENSG00000167487	KLHL26	chr19	18636965	18671714	79.8891	62.0933	97.6848	0.645341	0.00108198	0.038531
ENSG00000180385	EMC3-AS1	chr3	9986893	10006990	205.342	159.962	250.722	0.645113	2.20957e-07	6.6621e-05
ENSG00000165115	KIF27	chr9	83836698	83921465	113.316	88.4898	138.143	0.636772	0.00018114	0.0102833
ENSG00000173451	THAP2	chr12	71663009	71680639	110.818	87.1019	134.533	0.621403	0.000148613	0.00900168
ENSG00000221944	TIGD1	chr2	232547970	232550592	110.652	87.1887	134.114	0.615517	0.000217429	0.0118003
ENSG00000174151	CYB561D1	chr1	109494052	109502932	88.5667	70.0523	107.081	0.605161	0.00115419	0.0406032
ENSG00000080823	MOK	chr14	102224500	102305200	126.31	100.265	152.356	0.598746	0.000162869	0.00960784
ENSG00000161996	WDR90	chr16	649311	667833	179.228	142.634	215.822	0.594109	6.5573e-06	0.000891773
ENSG00000215908	CROCCP2	chr1	16618253	16657232	289.78	230.856	348.705	0.592909	8.94448e-09	5.5163e-06
ENSG00000138646	HERC5	chr4	88457117	88506163	522.493	416.662	628.324	0.591468	4.41463e-14	1.19795e-10
ENSG00000163312	HELQ	chr4	83407343	83455856	314.589	251.471	377.707	0.584964	5.08537e-09	3.83324e-06
ENSG00000215883	CYB5RL	chr1	54169651	54200036	126.386	101.069	151.702	0.581172	0.000145328	0.0089628
ENSG00000176155	CCDC57	chr17	82101460	82212830	210.996	168.902	253.091	0.580647	1.93504e-06	0.000364648
ENSG00000144445	KANSL1L	chr2	210021423	210171383	135.425	108.388	162.463	0.579511	0.000108855	0.0072756
ENSG00000168096	ANKS3	chr16	4696510	4734378	120.443	96.4111	144.475	0.578613	0.000292741	0.01516
ENSG00000007968	E2F2	chr1	23506430	23531220	154.891	124.388	185.395	0.571964	3.79227e-05	0.00341797
ENSG00000204859	ZBTB48	chr1	6580001	6589280	120.17	96.7112	143.629	0.565765	0.000723825	0.0288849
ENSG00000006459	KDM7A	chr7	140084746	140177035	209.279	168.57	249.989	0.565745	2.43934e-06	0.000424321
ENSG00000134574	DDB2	chr11	47214465	47239240	190.833	154.632	227.035	0.551115	1.24911e-05	0.00149981
ENSG00000130827	PLXNA3	chrX	154458281	154477779	162.978	132.504	193.453	0.542538	7.52178e-05	0.00560019
ENSG00000164463	CREBRF	chr5	173056352	173139284	405.623	330.501	480.746	0.539258	9.09388e-10	8.22571e-07
ENSG00000121406	ZNF549	chr19	57527325	57557542	129.985	105.844	154.125	0.53792	0.000455449	0.0202608
ENSG00000165943	MOAP1	chr14	93182196	93184928	122.082	99.5943	144.57	0.533161	0.000681933	0.0276435
ENSG00000197818	SLC9A8	chr20	49812713	49892242	204.036	166.798	241.274	0.529916	2.21571e-05	0.00231252
ENSG00000102543	CDADC1	chr13	49247925	49293485	115.538	94.3897	136.686	0.529473	0.000971076	0.0357968
ENSG00000197044	ZNF441	chr19	11767000	11784078	368.963	302.009	435.917	0.527996	3.95429e-08	1.57799e-05
ENSG00000164296	TIGD6	chr5	149993118	150001167	140.414	114.982	165.847	0.524625	0.000377218	0.0179582
ENSG00000144061	NPHP1	chr2	110122311	110205066	188.576	154.659	222.492	0.521833	5.56269e-05	0.00454666
ENSG00000196155	PLEKHG4	chr16	67277510	67289499	121.769	99.8252	143.714	0.521343	0.000784678	0.0305934
ENSG00000177873	ZNF619	chr3	40477113	40490236	199.783	164.172	235.395	0.517232	3.88057e-05	0.00341893
ENSG00000108474	PIGL	chr17	16217191	16351797	151.41	124.596	178.224	0.512976	0.000499917	0.0214558
ENSG00000162757	C1orf74	chr1	209779208	209784559	134.274	110.668	157.879	0.508708	0.000699126	0.0280643
ENSG00000205903	ZNF316	chr7	6637322	6656432	201.057	165.837	236.278	0.50814	5.20898e-05	0.00433592
ENSG00000242086	MUC20-OT1	chr3	195658062	195739964	179.959	148.575	211.343	0.505527	0.000131724	0.00827421
ENSG00000119711	ALDH6A1	chr14	74056850	74084493	144.143	119.002	169.285	0.504897	0.000472956	0.0208346
ENSG00000152527	PLEKHH2	chr2	43637273	43767987	127.46	105.261	149.66	0.503677	0.00150304	0.0488456
ENSG00000196597	ZNF782	chr9	96816472	96875623	148.263	122.488	174.038	0.503298	0.000381914	0.0180551
ENSG00000174628	IQCK	chr16	19716456	19858467	129.595	107.18	152.009	0.500187	0.000955768	0.035626
ENSG00000162772	ATF3	chr1	212565334	212620777	169.844	140.531	199.156	0.500011	0.000995365	0.0365003
ENSG00000170581	STAT2	chr12	56341597	56360155	377.699	313.05	442.349	0.497448	2.03508e-07	6.53329e-05
ENSG00000078687	TNRC6C	chr17	77959240	78108835	183.521	152.56	214.481	0.488756	0.000160211	0.00949231
ENSG00000105866	SP4	chr7	21428034	21514822	331.854	276.421	387.286	0.485041	6.92438e-07	0.000161983
ENSG00000157796	WDR19	chr4	39182404	39285810	281.202	234.235	328.169	0.484726	3.21432e-06	0.000531852
ENSG00000177842	ZNF620	chr3	40477131	40518736	188.566	157.042	220.089	0.484316	0.000166507	0.00968257
ENSG00000166377	ATP9B	chr18	79069285	79378287	240.314	200.862	279.767	0.476004	2.42746e-05	0.00247637
ENSG00000087301	TXNDC16	chr14	52430590	52552522	289.67	242.41	336.93	0.473335	6.64628e-06	0.000892839
ENSG00000145348	TBCK	chr4	106041599	106321495	209.751	175.543	243.959	0.472516	7.7675e-05	0.00569672
ENSG00000156232	WHAMM	chr15	82809628	82836108	386.486	323.872	449.101	0.470377	1.38232e-07	4.83838e-05
ENSG00000174010	KLHL15	chrX	23983720	24027186	270.403	226.74	314.066	0.468268	1.52556e-05	0.00176913
ENSG00000115267	IFIH1	chr2	162267079	162318703	591.571	497.655	685.487	0.46119	1.69541e-08	8.83286e-06
ENSG00000172667	ZMAT3	chr3	179017223	179072279	217.088	182.642	251.533	0.459573	0.000193834	0.0108675
ENSG00000185684	EP400P1	chr12	132084283	132131639	267.333	225.103	309.564	0.457911	1.92264e-05	0.00205404
ENSG00000101412	E2F1	chr20	33675683	33686404	229.634	193.66	265.608	0.453763	8.08064e-05	0.005863
ENSG00000168564	CDKN2AIP	chr4	183444591	183448198	444.288	375.119	513.456	0.45186	3.75355e-08	1.54328e-05
ENSG00000070269	TMEM260	chr14	56488354	56650606	182.82	154.509	211.131	0.447952	0.000427634	0.019474
ENSG00000143458	GABPB2	chr1	151070578	151125542	329.802	278.935	380.668	0.447224	3.17715e-06	0.000531852
ENSG00000155592	ZKSCAN2	chr16	25236001	25257931	338.289	286.387	390.192	0.444885	2.30786e-06	0.000406662
ENSG00000241058	NSUN6	chr10	18545561	18659285	169.567	143.725	195.409	0.440545	0.000901309	0.0341591
ENSG00000185158	LRRC37B	chr17	32007872	32053504	175.357	148.644	202.069	0.440436	0.00089199	0.0339959
ENSG00000151014	NOCT	chr4	139015789	139045939	270.25	229.278	311.222	0.439199	4.13472e-05	0.00359615
ENSG00000171469	ZNF561	chr19	9604680	9621399	226.983	192.657	261.309	0.437762	0.000167565	0.00968257
ENSG00000198026	ZNF335	chr20	45948653	45972172	269.298	228.617	309.98	0.437594	5.77211e-05	0.00468958
ENSG00000175970	UNC119B	chr12	120710435	120723640	270.299	229.618	310.979	0.435947	4.68248e-05	0.00397074
ENSG00000174738	NR1D2	chr3	23945260	23980618	480.408	408.354	552.462	0.435134	3.10809e-08	1.36034e-05
ENSG00000141084	RANBP10	chr16	67723066	67806652	359.505	305.649	413.36	0.434295	1.84329e-06	0.000352251
ENSG00000100784	RPS6KA5	chr14	90847862	91060636	171.252	145.6	196.903	0.432912	0.00132738	0.0444689
ENSG00000170836	PPM1D	chr17	60600183	60666280	372.588	317.694	427.482	0.427065	2.21843e-06	0.000401329
ENSG00000130363	RSPH3	chr6	158972871	159000187	217.627	185.702	249.553	0.424377	0.000374642	0.0179582
ENSG00000132478	UNK	chr17	75784771	75825799	294.082	251.119	337.044	0.423104	3.26843e-05	0.00310112
ENSG00000142459	EVI5L	chr19	7830233	7864976	218.777	186.884	250.669	0.421684	0.00032551	0.0164796
ENSG00000198919	DZIP3	chr3	108589682	108694846	351.695	300.515	402.874	0.421676	1.36333e-05	0.00162261
ENSG00000198924	DCLRE1A	chr10	113834725	113854383	382.059	326.585	437.532	0.420813	4.47708e-06	0.000682528
ENSG00000169762	TAPT1	chr4	16160505	16227410	295.798	252.827	338.768	0.420705	3.80739e-05	0.00341797
ENSG00000198718	TOGARAM1	chr14	44962208	45074431	766.714	657.525	875.904	0.413182	8.62894e-11	1.06434e-07
ENSG00000186532	SMYD4	chr17	1779485	1830634	293.156	251.647	334.666	0.409903	0.000167704	0.00968257
ENSG00000140463	BBS4	chr15	72686179	72738476	226.475	194.439	258.511	0.409076	0.000440934	0.0199603
ENSG00000284024	HSPA14	chr10	14838160	14847018	360.26	309.533	410.988	0.407855	9.16821e-06	0.00117353
ENSG00000158691	ZSCAN12	chr6	28378955	28399734	198.55	170.784	226.317	0.404116	0.000880022	0.0336342
ENSG00000140830	TXNL4B	chr16	72044289	72094431	252.708	217.66	287.756	0.401162	0.000336896	0.0168672
ENSG00000132950	ZMYM5	chr13	19823482	19863636	228.046	196.596	259.495	0.398701	0.000630076	0.0259057
ENSG00000138050	THUMPD2	chr2	39736060	39779267	332.223	286.664	377.783	0.396986	3.74522e-05	0.00341042
ENSG00000185507	IRF7	chr11	612553	615999	305.298	263.573	347.024	0.395521	7.37877e-05	0.00553122
ENSG00000198563	DDX39B	chr6	31530219	31542448	306.728	264.876	348.58	0.394869	6.25721e-05	0.0048513
ENSG00000160949	TONSL	chr8	144428775	144444444	358.268	309.565	406.972	0.393576	2.31319e-05	0.00239583
ENSG00000168014	C2CD3	chr11	74012714	74171210	861.445	744.682	978.208	0.393055	2.46118e-11	3.71037e-08
ENSG00000170100	ZNF778	chr16	89217703	89237071	281.668	243.55	319.785	0.391473	0.000150271	0.00902157
ENSG00000077157	PPP1R12B	chr1	202348699	202592706	334.969	289.687	380.251	0.391275	4.18918e-05	0.00361121
ENSG00000196922	ZNF252P	chr8	144973589	145002895	344.712	298.237	391.187	0.390254	3.2014e-05	0.00305891
ENSG00000032742	IFT88	chr13	20567069	20691437	280.537	243.046	318.029	0.386535	0.000196067	0.0109026
ENSG00000047346	FAM214A	chr15	52581317	52709817	291.846	252.979	330.714	0.38523	0.000152971	0.00912056
ENSG00000225470	JPX	chrX	73944184	74070408	277.348	240.756	313.94	0.381526	0.000452207	0.0201827
ENSG00000196911	KPNA5	chr6	116681187	116741866	273.011	237.104	308.918	0.380297	0.000311118	0.0158693
ENSG00000130589	HELZ2	chr20	63558086	63574239	1094.14	951.137	1237.15	0.37894	2.59182e-10	2.70506e-07
ENSG00000111554	MDM1	chr12	68272443	68332381	322.281	280.545	364.018	0.374604	0.000102622	0.00695779
ENSG00000094631	HDAC6	chrX	48801377	48824982	246.562	214.688	278.436	0.373574	0.000624307	0.025825
ENSG00000258890	CEP95	chr17	64506588	64542461	573.566	499.649	647.484	0.373271	3.80391e-07	0.000101199
ENSG00000154781	CCDC174	chr3	14651746	14672659	301.166	262.296	340.036	0.373237	0.00021297	0.01167
ENSG00000164187	LMBRD2	chr5	36098412	36151961	564.858	493.079	636.638	0.367996	6.49328e-07	0.000154563
ENSG00000110046	ATG2A	chr11	64894546	64917248	250.884	219.008	282.76	0.367115	0.000839487	0.0323584
ENSG00000122484	RPAP2	chr1	92298965	92402056	653.51	570.823	736.196	0.366479	2.87046e-07	8.11382e-05
ENSG00000165684	SNAPC4	chr9	136375577	136400168	299.956	262.25	337.663	0.363413	0.000363077	0.0176567
ENSG00000011021	CLCN6	chr1	11806096	11848079	298.603	261.079	336.127	0.363292	0.000369555	0.0179076
ENSG00000177082	WDR73	chr15	84639281	84654343	293.533	257.198	329.868	0.357779	0.000446699	0.020128
ENSG00000168016	TRANK1	chr3	36826820	36945098	395.934	347.191	444.677	0.356118	9.03622e-05	0.00635251
ENSG00000112584	FAM120B	chr6	170290703	170407065	422.612	371.425	473.8	0.35037	3.6878e-05	0.00338082
ENSG00000135164	DMTF1	chr7	87152361	87196337	587.657	516.783	658.531	0.349093	3.33538e-06	0.000545235
ENSG00000198198	SZT2	chr1	43389882	43454247	532.258	468.142	596.373	0.348607	4.77711e-06	0.000712262
ENSG00000131470	PSMC3IP	chr17	42572315	42577831	439.233	386.338	492.129	0.34837	3.01397e-05	0.00294199
ENSG00000104133	SPG11	chr15	44562696	44663678	778.929	686.344	871.515	0.344147	4.49359e-08	1.70441e-05
ENSG00000176225	RTTN	chr18	70003031	70205945	479.144	422.518	535.77	0.341882	3.32587e-05	0.0031121
ENSG00000172046	USP19	chr3	49108046	49120938	383.474	338.313	428.635	0.340496	0.000133829	0.00836773
ENSG00000132326	PER2	chr2	238244038	238290102	269.025	237.337	300.712	0.340168	0.0013209	0.0443615
ENSG00000205765	C5orf51	chr5	41904188	41921636	501.191	442.371	560.01	0.339513	1.65376e-05	0.00186894
ENSG00000093009	CDC45	chr22	19479459	19520612	385.893	340.676	431.11	0.338773	0.000126114	0.00799588
ENSG00000007341	ST7L	chr1	112523518	112620825	364.301	321.729	406.872	0.337792	0.000179398	0.0102703
ENSG00000166263	STXBP4	chr17	54968727	55173632	426.965	377.203	476.727	0.337027	7.21191e-05	0.00543618
ENSG00000075702	WDR62	chr19	36054881	36105106	367.971	325.306	410.637	0.335147	0.000263958	0.0140999
ENSG00000181381	DDX60L	chr4	168356735	168537786	1452.3	1284.33	1620.27	0.334994	1.36438e-11	2.31399e-08
ENSG00000056277	ZNF280C	chrX	130202711	130268899	354.612	313.658	395.567	0.333778	0.000352744	0.0174571
ENSG00000184677	ZBTB40	chr1	22428838	22531157	570.048	504.322	635.774	0.333577	3.95759e-06	0.000624378
ENSG00000173276	ZBTB21	chr21	41986831	42010387	721.283	638.153	804.413	0.333568	2.83899e-07	8.11382e-05
ENSG00000166004	CEP295	chr11	93661639	93730358	1142.86	1012.75	1272.96	0.329615	3.64214e-10	3.52975e-07
ENSG00000113742	CPEB4	chr5	173888280	173961976	554.243	491.339	617.148	0.328299	3.29597e-05	0.00310554
ENSG00000188938	FAM120AOS	chr9	93431441	93453592	405.096	359.346	450.845	0.326446	0.000148044	0.00900168
ENSG00000137628	DDX60	chr4	168216293	168318807	1884.48	1672.74	2096.22	0.325407	1.82549e-15	8.25606e-12
ENSG00000214655	ZSWIM8	chr10	73785582	73801797	494.792	439.218	550.365	0.324788	4.72876e-05	0.00398508
ENSG00000090612	ZNF268	chr12	133181409	133214831	432.732	384.809	480.656	0.320114	0.000124551	0.00797125
ENSG00000180008	SOCS4	chr14	55027230	55049488	707.642	629.561	785.723	0.319218	1.21341e-06	0.000250632
ENSG00000167378	IRGQ	chr19	43584369	43596135	367.22	326.656	407.784	0.319157	0.000751781	0.0296516
ENSG00000146263	MMS22L	chr6	97142161	97283217	957.243	851.728	1062.76	0.319011	3.67802e-08	1.54328e-05
ENSG00000119397	CNTRL	chr9	121074863	121177610	969.833	863.094	1076.57	0.318523	1.32737e-08	7.83036e-06
ENSG00000119661	DNAL1	chr14	73644875	73703732	313.484	279.075	347.893	0.316973	0.0012691	0.0432519
ENSG00000110756	HPS5	chr11	18278668	18322198	476.836	425.36	528.312	0.312047	0.000113141	0.00748827
ENSG00000118965	WDR35	chr2	19910260	19990131	484.488	432.711	536.266	0.308903	0.000147007	0.00898968
ENSG00000187741	FANCA	chr16	89737549	89816657	434.526	388.204	480.847	0.308051	0.000303285	0.0156463
ENSG00000143669	LYST	chr1	235661041	235883640	458.366	409.728	507.004	0.306658	0.00016588	0.00968257
ENSG00000149548	CCDC15	chr11	124954121	125041489	425.405	380.462	470.347	0.30525	0.000418974	0.0192048
ENSG00000157181	ODR4	chr1	186375838	186421378	546.099	488.543	603.656	0.304679	5.09082e-05	0.00426372
ENSG00000133302	SLF1	chr5	94618347	94739436	572.631	512.92	632.343	0.301443	3.83292e-05	0.00341797
ENSG00000135541	AHI1	chr6	135283532	135497776	440.223	394.762	485.684	0.29835	0.000356174	0.0174571
ENSG00000137200	CMTR1	chr6	37433219	37482827	568.057	509.731	626.383	0.296784	6.19732e-05	0.00483249
ENSG00000180376	CCDC66	chr3	56557161	56621818	463.004	415.609	510.399	0.295755	0.000270701	0.0142913
ENSG00000135913	USP37	chr2	218450251	218568361	902.742	810.804	994.68	0.294552	4.94942e-07	0.000121371
ENSG00000198920	KIAA0753	chr17	6578148	6640927	387.792	348.88	426.703	0.289751	0.00102218	0.0369838
ENSG00000120709	FAM53C	chr5	138331935	138349729	424.604	382.171	467.037	0.288636	0.000561656	0.02374
ENSG00000151012	SLC7A11	chr4	138164097	138242349	489.289	440.985	537.594	0.285203	0.000356399	0.0174571
ENSG00000125779	PANK2	chr20	3888839	3929882	471.192	424.744	517.639	0.284746	0.000359408	0.0175412
ENSG00000132680	KHDC4	chr1	155913043	155934400	424.765	383.53	466	0.280324	0.000854869	0.032858
ENSG00000177302	TOP3A	chr17	18271428	18315007	579.53	523.372	635.688	0.279997	0.000103587	0.00695779
ENSG00000143476	DTL	chr1	212035553	212107400	806.821	729.318	884.324	0.27768	6.18679e-06	0.000878225
ENSG00000077458	FAM76B	chr11	95768942	95790409	515.544	467.183	563.904	0.270935	0.000441338	0.0199603
ENSG00000103540	CCP110	chr16	19523811	19553408	779.322	706.45	852.195	0.270247	1.65921e-05	0.00186894
ENSG00000197299	BLM	chr15	90717327	90816165	738.76	670.741	806.78	0.266058	2.97057e-05	0.00292063
ENSG00000138658	ZGRF1	chr4	112539333	112636995	755.102	685.583	824.621	0.266047	3.11061e-05	0.00301463
ENSG00000144554	FANCD2	chr3	10026414	10101930	662.084	601.291	722.877	0.265285	8.91381e-05	0.00629909
ENSG00000101868	POLA1	chrX	24693919	24996986	722.543	656.722	788.365	0.263214	4.0798e-05	0.00357127
ENSG00000118412	CASP8AP2	chr6	89829894	89874436	1461.33	1329.29	1593.36	0.261231	8.72941e-09	5.5163e-06
ENSG00000119778	ATAD2B	chr2	23748664	23927114	496.722	451.921	541.522	0.260421	0.000815036	0.0315406
ENSG00000178295	GEN1	chr2	17753858	17788941	741.627	675.316	807.939	0.258334	5.48203e-05	0.00450789
ENSG00000076003	MCM6	chr2	135839626	135876426	602.075	548.457	655.694	0.257216	0.000354342	0.0174571
ENSG00000159433	STARD9	chr15	42575659	42720981	501.616	457.34	545.892	0.254836	0.00135848	0.0450655
ENSG00000117625	RCOR3	chr1	211258377	211316385	485.054	442.361	527.747	0.254095	0.00134847	0.0448432
ENSG00000115970	THADA	chr2	43230836	43596046	637.335	582.925	691.746	0.246543	0.000409328	0.0190267
ENSG00000012048	BRCA1	chr17	43044295	43170245	1173.49	1073.44	1273.53	0.246378	1.21917e-06	0.000250632
ENSG00000264522	OTUD7B	chr1	149937812	150010676	637.366	583.011	691.722	0.24628	0.000309892	0.0158693
ENSG00000136492	BRIP1	chr17	61681266	61863521	746.957	683.372	810.542	0.245885	0.000110252	0.00733285
ENSG00000162601	MYSM1	chr1	58654739	58700092	752.804	689.951	815.657	0.241147	0.000450143	0.0201569
ENSG00000086102	NFX1	chr9	33290511	33371157	579.734	531.529	627.939	0.240059	0.00096925	0.0357968
ENSG00000111647	UHRF1BP1L	chr12	100028455	100142848	690.787	634.317	747.256	0.236054	0.000379466	0.0180021
ENSG00000151461	UPF2	chr10	11920022	12043170	972.882	893.544	1052.22	0.235584	2.18401e-05	0.0022971
ENSG00000139618	BRCA2	chr13	32315474	32400266	1853.28	1703.33	2003.23	0.233845	2.16502e-07	6.6621e-05
ENSG00000125885	MCM8	chr20	5950652	5998977	929.48	855.623	1003.34	0.229512	8.14954e-05	0.00588154
ENSG00000080839	RBL1	chr20	36996349	37095995	1033.8	951.71	1115.88	0.22937	2.81009e-05	0.0027906
ENSG00000188647	PTAR1	chr9	69709522	69759959	1104.9	1020.83	1188.96	0.219764	3.49712e-05	0.00322782
ENSG00000031003	FAM13B	chr5	137937960	138051961	656.324	606.818	705.83	0.217723	0.00124555	0.042676
ENSG00000044459	CNTLN	chr9	17134982	17503923	633.479	585.782	681.176	0.217318	0.00150483	0.0488456
ENSG00000157764	BRAF	chr7	140719327	140924928	805.47	745.233	865.706	0.215917	0.000633925	0.0259852
ENSG00000131023	LATS1	chr6	149658153	149718256	761.741	705.405	818.076	0.213501	0.000959631	0.035672
ENSG00000138642	HERC6	chr4	88378739	88443111	780.597	723.409	837.786	0.211498	0.00116669	0.0406932
ENSG00000176208	ATAD5	chr17	30831970	30895869	1206.82	1120.39	1293.24	0.20681	8.63364e-05	0.00613305
ENSG00000184445	KNTC1	chr12	122527246	122626396	1228.24	1141.18	1315.31	0.204711	0.0001208	0.00787986
ENSG00000177084	POLE	chr12	132623753	132687365	1182.08	1098.66	1265.49	0.203787	0.000147089	0.00898968
ENSG00000140534	TICRR	chr15	89575482	89631056	770.483	716.118	824.849	0.203668	0.00125289	0.0428193
ENSG00000137337	MDC1	chr6	30699807	30717889	1164.13	1084.43	1243.83	0.197691	9.75651e-05	0.00668567
ENSG00000129292	PHF20L1	chr8	132775358	132848807	1014.8	946.144	1083.45	0.195307	0.000399413	0.0187517
ENSG00000198952	SMG5	chr1	156249224	156282825	920.718	861.478	979.959	0.185705	0.00140827	0.0462649
ENSG00000065328	MCM10	chr10	13161554	13211104	906.142	847.982	964.303	0.185248	0.00129283	0.0437434
ENSG00000092439	TRPM7	chr15	50552473	50686815	1235.72	1156.66	1314.77	0.184694	0.000181014	0.0102833
ENSG00000172466	ZNF24	chr18	35332212	35345482	1015.55	952.267	1078.84	0.179867	0.00133872	0.0446284
ENSG00000198707	CEP290	chr12	88049014	88142216	1056.35	990.915	1121.78	0.178792	0.00152956	0.0492947
ENSG00000009413	REV3L	chr6	111299028	111483715	1253.41	1181.47	1325.34	0.165638	0.00129193	0.0437434
ENSG00000108510	MED13	chr17	61942605	62065282	1873.8	1785.56	1962.04	0.135907	0.000689875	0.0278224
ENSG00000178209	PLEC	chr8	143915147	143976734	4397.26	4556.66	4237.87	-0.104612	0.000339491	0.0168891
ENSG00000151914	DST	chr6	56457987	56954628	5511.87	5721.12	5302.62	-0.109574	3.18437e-05	0.00305891
ENSG00000140575	IQGAP1	chr15	90388218	90502243	2764.81	2873.82	2655.79	-0.113788	0.00115613	0.0406032
ENSG00000196924	FLNA	chrX	154348524	154374638	3944.68	4101.37	3787.98	-0.114648	0.000493502	0.0213298
ENSG00000127603	MACF1	chr1	39081316	39487177	4981.91	5183.46	4780.36	-0.116772	6.57262e-06	0.000891773
ENSG00000253729	PRKDC	chr8	47773108	47960183	4192.04	4364.05	4020.02	-0.118437	6.04741e-05	0.00480999
ENSG00000071054	MAP4K4	chr2	101696850	101894689	2886.96	3012.54	2761.37	-0.125553	0.000662309	0.0270669
ENSG00000114867	EIF4G1	chr3	184314495	184335358	2084.49	2175.31	1993.68	-0.125729	0.00155806	0.0499758
ENSG00000060982	BCAT1	chr12	24810022	24949459	2046.94	2139.47	1954.41	-0.130456	0.000905852	0.0342356
ENSG00000135318	NT5E	chr6	85449584	85495791	2138.35	2241.56	2035.15	-0.139303	0.00133201	0.0445141
ENSG00000131711	MAP1B	chr5	72107234	72209570	4209.93	4418.13	4001.73	-0.142779	1.28449e-06	0.000252579
ENSG00000166147	FBN1	chr15	48408306	48645849	1687.09	1772.65	1601.53	-0.146371	0.000963054	0.0357014
ENSG00000131016	AKAP12	chr6	151239999	151358557	2562.54	2697.39	2427.7	-0.151915	3.47157e-05	0.00322618
ENSG00000084234	APLP2	chr11	130068147	130144811	1820.98	1917.15	1724.8	-0.152454	0.000515614	0.0219306
ENSG00000152818	UTRN	chr6	144285701	144853034	2231.14	2349.41	2112.86	-0.153034	0.000118066	0.00773874
ENSG00000168615	ADAM9	chr8	38996869	39105144	1424.53	1501.51	1347.55	-0.155966	0.00151263	0.0489818
ENSG00000145555	MYO10	chr5	16661914	16936276	1924.69	2029.41	1819.97	-0.157063	0.000184292	0.0103754
ENSG00000135862	LAMC1	chr1	183023460	183145592	2111.8	2227.18	1996.43	-0.157723	0.000292542	0.01516
ENSG00000090863	GLG1	chr16	74447427	74607144	1234.48	1303.31	1165.66	-0.160903	0.0011487	0.0405876
ENSG00000136068	FLNB	chr3	58008400	58172251	3244.64	3426.31	3062.97	-0.161676	8.59448e-07	0.00019435
ENSG00000105976	MET	chr7	116672390	116798386	1193.05	1260.67	1125.44	-0.163559	0.00153698	0.0494163
ENSG00000110092	CCND1	chr11	69641087	69654474	1455.92	1538.49	1373.36	-0.163698	0.000616335	0.0255732
ENSG00000096384	HSP90AB1	chr6	44246166	44253888	1576.27	1665.69	1486.86	-0.163749	0.00047968	0.0209945
ENSG00000080824	HSP90AA1	chr14	102080738	102139699	1967.73	2079.92	1855.53	-0.164609	9.3937e-05	0.00650274
ENSG00000115306	SPTBN1	chr2	54456285	54671445	3176.67	3360.21	2993.13	-0.166845	1.05643e-06	0.000227518
ENSG00000092201	SUPT16H	chr14	21351472	21384266	1346.66	1425.73	1267.6	-0.169476	0.000427717	0.019474
ENSG00000115380	EFEMP1	chr2	55865967	55924139	1336.15	1414.86	1257.45	-0.170026	0.000554428	0.0235077
ENSG00000163430	FSTL1	chr3	120392293	120451253	1448.58	1534.46	1362.71	-0.171136	0.000214635	0.0116955
ENSG00000124942	AHNAK	chr11	62433542	62556235	6102.87	6472.32	5733.42	-0.174859	0.000467425	0.020658
ENSG00000088387	DOCK9	chr13	98793429	99086625	1048.67	1112.59	984.757	-0.175915	0.00105137	0.0377379
ENSG00000128512	DOCK4	chr7	111726110	112206411	1282.63	1361.45	1203.82	-0.177392	0.000320608	0.0162922
ENSG00000177469	CAVIN1	chr17	42402452	42423517	1381.45	1466.51	1296.4	-0.177742	0.000268573	0.0142344
ENSG00000120694	HSPH1	chr13	31134974	31162388	1351.47	1435.8	1267.14	-0.180147	0.000171487	0.00985903
ENSG00000166598	HSP90B1	chr12	103930107	103953645	1537.4	1633.42	1441.37	-0.180342	0.00021001	0.0116303
ENSG00000177311	ZBTB38	chr3	141324213	141449792	1544.45	1641.48	1447.41	-0.181399	9.98033e-05	0.00680468
ENSG00000135046	ANXA1	chr9	73151757	73170393	1063.76	1130.83	996.697	-0.181983	0.000929643	0.0348436
ENSG00000047315	POLR2B	chr4	56977722	57031168	1086.09	1157.42	1014.77	-0.189583	0.000310167	0.0158693
ENSG00000105974	CAV1	chr7	116524785	116561184	1145.31	1220.64	1069.98	-0.189886	0.00150437	0.0488456
ENSG00000164163	ABCE1	chr4	145097932	145129179	994.102	1059.8	928.406	-0.190769	0.000614965	0.0255732
ENSG00000082397	EPB41L3	chr18	5392381	5630700	1062.6	1133.05	992.156	-0.191394	0.000377036	0.0179582
ENSG00000162909	CAPN2	chr1	223701593	223776018	1126.12	1200.87	1051.38	-0.191614	0.000373695	0.0179582
ENSG00000005884	ITGA3	chr17	50055968	50090481	1124.19	1199.17	1049.21	-0.192553	0.00047551	0.0208794
ENSG00000078269	SYNJ2	chr6	157981887	158099176	1016.12	1084.45	947.795	-0.194121	0.000482689	0.0210583
ENSG00000138119	MYOF	chr10	93306429	93482317	2109.36	2252.6	1966.13	-0.19614	3.67739e-06	0.000586997
ENSG00000134333	LDHA	chr11	18394388	18408425	922.556	985.399	859.713	-0.196638	0.000682531	0.0276435
ENSG00000117298	ECE1	chr1	21217247	21345572	1241.69	1327.85	1155.53	-0.200377	0.000153264	0.00912056
ENSG00000138829	FBN2	chr5	128257909	128659185	1871.86	2002.76	1740.97	-0.201987	2.9719e-06	0.000504034
ENSG00000196935	SRGAP1	chr12	63844293	64162221	945.784	1012	879.571	-0.202121	0.000501447	0.0214558
ENSG00000133026	MYH10	chr17	8474205	8630761	1234.85	1322.49	1147.22	-0.204948	0.000103356	0.00695779
ENSG00000091409	ITGA6	chr2	172427354	172506282	1209.9	1296.31	1123.5	-0.206242	8.45295e-05	0.0060363
ENSG00000183287	CCBE1	chr18	59430939	59697662	953.575	1021.85	885.295	-0.206743	0.000339823	0.0168891
ENSG00000125810	CD93	chr20	23079349	23086340	1335.13	1431.43	1238.83	-0.20832	1.67931e-05	0.00186894
ENSG00000102699	PARP4	chr13	24420926	24512810	1190.48	1276.42	1104.54	-0.20848	0.000123581	0.00794668
ENSG00000164733	CTSB	chr8	11842524	11869448	848.956	910.846	787.066	-0.210475	0.00101257	0.0369315
ENSG00000111961	SASH1	chr6	148272304	148552050	1333.5	1431.88	1235.13	-0.213081	0.000130602	0.00824191
ENSG00000076706	MCAM	chr11	119308529	119321521	807.589	868.443	746.736	-0.217563	0.00071193	0.028494
ENSG00000142192	APP	chr21	25880550	26171128	1497.2	1612.88	1381.52	-0.223236	4.76146e-06	0.000712262
ENSG00000003436	TFPI	chr2	187464230	187565760	1377.25	1483.99	1270.51	-0.223907	3.85429e-05	0.00341797
ENSG00000116260	QSOX1	chr1	180154834	180204030	692.454	747.074	637.833	-0.227742	0.000768762	0.0301461
ENSG00000198363	ASPH	chr8	61500556	61714640	1574.66	1699.12	1450.19	-0.228394	1.43052e-06	0.000277276
ENSG00000152127	MGAT5	chr2	134119983	134454621	1241.81	1340.02	1143.59	-0.228508	1.04595e-05	0.00131403
ENSG00000108219	TSPAN14	chr10	80454166	80533123	590.86	637.67	544.051	-0.22868	0.00131625	0.0443149
ENSG00000204262	COL5A2	chr2	189031896	189225312	653.441	705.874	601.007	-0.231673	0.000783544	0.0305934
ENSG00000156113	KCNMA1	chr10	76869601	77638369	678.416	733.567	623.265	-0.234735	0.000402798	0.0188454
ENSG00000116962	NID1	chr1	235975830	236065162	1239.96	1341.19	1138.73	-0.235903	2.06154e-05	0.00218524
ENSG00000116005	PCYOX1	chr2	70257386	70281191	659.88	713.979	605.78	-0.236726	0.000805493	0.031315
ENSG00000141753	IGFBP4	chr17	40443461	40457731	576.318	623.863	528.774	-0.238163	0.000914442	0.0344643
ENSG00000049323	LTBP1	chr2	32946972	33399509	1063.17	1151.01	975.328	-0.238714	2.77527e-05	0.0027906
ENSG00000102038	SMARCA1	chrX	129446501	129523500	683.413	740.051	626.775	-0.239325	0.000410704	0.0190267
ENSG00000148841	ITPRIP	chr10	104309698	104338448	616.817	668.167	565.468	-0.24037	0.000628196	0.0259057
ENSG00000173402	DAG1	chr3	49468703	49535618	573.431	621.213	525.649	-0.240566	0.00102123	0.0369838
ENSG00000103222	ABCC1	chr16	15949577	16143074	580.722	629.51	531.933	-0.242565	0.000743073	0.0294275
ENSG00000105220	GPI	chr19	34359480	34402413	727.307	789.213	665.401	-0.245851	0.000144968	0.0089628
ENSG00000184640	SEPT9	chr17	77280569	77500596	826.595	897.153	756.036	-0.2466	6.58305e-05	0.00504626
ENSG00000130508	PXDN	chr2	1631887	1744852	651.34	707.352	595.328	-0.248361	0.000281106	0.014726
ENSG00000149257	SERPINH1	chr11	75562056	75572783	502.449	547.153	457.745	-0.256888	0.00106813	0.0381378
ENSG00000185567	AHNAK2	chr14	104937244	104978357	1287	1401.56	1172.44	-0.257313	2.07054e-07	6.53329e-05
ENSG00000113719	ERGIC1	chr5	172834275	172952685	531.852	579.589	484.116	-0.259187	0.000763469	0.0300254
ENSG00000099250	NRP1	chr10	33177492	33336262	1431.04	1560.72	1301.36	-0.262016	5.00943e-07	0.000121371
ENSG00000143799	PARP1	chr1	226360691	226408079	903.722	989.58	817.863	-0.274651	1.72182e-05	0.00186894
ENSG00000135636	DYSF	chr2	71453722	71686768	586.174	641.974	530.373	-0.275035	0.000585299	0.0245103
ENSG00000115461	IGFBP5	chr2	216672105	216695525	1104.01	1210.27	997.762	-0.278305	1.25175e-06	0.000251406
ENSG00000196549	MME	chr3	155024124	155183729	440.059	483.479	396.639	-0.284975	0.00138741	0.045793
ENSG00000100034	PPM1F	chr22	21919420	21952837	476.84	523.933	429.747	-0.285292	0.000417974	0.0192048
ENSG00000154310	TNIK	chr3	171061339	171460408	350.407	386.91	313.905	-0.300804	0.00127193	0.0432519
ENSG00000131370	SH3BP5	chr3	15254853	15341368	422.849	468.498	377.199	-0.311971	0.00124295	0.042676
ENSG00000178695	KCTD12	chr13	76880166	76886390	808.595	903.229	713.961	-0.338824	0.0014811	0.048423
ENSG00000198959	TGM2	chr20	38127387	38166578	750.641	840.584	660.698	-0.346935	1.91897e-07	6.3504e-05
ENSG00000104368	PLAT	chr8	42175233	42207724	309.457	348.877	270.038	-0.368353	0.00109075	0.0387417
ENSG00000132002	DNAJB1	chr19	14514770	14529770	474.507	537.972	411.041	-0.387422	2.2151e-06	0.000401329
ENSG00000146021	KLHL3	chr5	137617500	137736090	196.464	223.705	169.224	-0.400597	0.00138769	0.045793
ENSG00000122861	PLAU	chr10	73909177	73917497	359.263	409.42	309.107	-0.404334	2.79881e-05	0.0027906
ENSG00000115756	HPCAL1	chr2	10302889	10427617	198.358	227.63	169.086	-0.426745	0.00059753	0.0249455
ENSG00000137331	IER3	chr6	30743199	30744554	165.807	190.36	141.253	-0.427824	0.00151802	0.0490392
ENSG00000088367	EPB41L1	chr20	36091504	36232799	219.496	254.577	184.415	-0.463	0.000122748	0.00793066
ENSG00000023171	GRAMD1B	chr11	123358428	123627774	322.721	374.844	270.597	-0.468666	2.28183e-06	0.000406662
ENSG00000065534	MYLK	chr3	123610049	123884331	150.512	175.012	126.012	-0.470705	0.00110086	0.0389985
ENSG00000072041	SLC6A15	chr12	84859488	84913615	186.103	218.93	153.276	-0.511533	6.18495e-05	0.00483249
ENSG00000159167	STC1	chr8	23841915	23854807	302.77	373.768	231.772	-0.687079	5.25675e-05	0.004349
ENSG00000165959	CLMN	chr14	95181940	95319906	88.937	110.935	66.9395	-0.720334	0.000122633	0.00793066
ENSG00000204389	HSPA1A	chr6	31815464	31817946	173.116	233.963	112.27	-1.05266	2.03693e-13	4.60618e-10
ENSG00000204388	HSPA1B	chr6	31827735	31830255	88.4572	122.293	54.6216	-1.14837	8.00689e-08	2.93615e-05
ENSG00000177932	ZNF354C	chr5	179060415	179083537	923.93	1563.43	284.43	-2.45443	3.92406e-59	5.32417e-55
ENSG00000173110	HSPA6	chr1	161524540	161526910	86.7522	155.62	17.8845	-3.05199	9.3691e-07	0.000205032
ENSG00000196437	ZNF569	chr19	37411155	37469275	257.247	226.705	287.788	0.342844	0.00157074	0.0502636
ENSG00000071967	CYBRD1	chr2	171522247	171558133	532.073	575.608	488.537	-0.236172	0.00159703	0.0504389
ENSG00000108797	CNTNAP1	chr17	42682613	42699814	193.046	219.492	166.6	-0.395704	0.0016003	0.0504389
ENSG00000136144	RCBTB1	chr13	49531946	49585583	264.816	233.96	295.671	0.336452	0.00159687	0.0504389
ENSG00000137962	ARHGAP29	chr1	94148988	94275068	2051.09	2142.68	1959.5	-0.128869	0.00160224	0.0504389
ENSG00000173706	HEG1	chr3	124965710	125055958	1523.83	1599.84	1447.83	-0.143946	0.0016	0.0504389
ENSG00000184588	PDE4B	chr1	65792514	66374579	522.853	566.531	479.176	-0.241137	0.00158574	0.0504389
ENSG00000264538	SUZ12P1	chr17	30709299	30790908	152.165	129.057	175.273	0.438673	0.00159271	0.0504389
ENSG00000143303	RRNAD1	chr1	156728442	156736960	111.474	89.3006	133.648	0.576388	0.00160813	0.0505072
ENSG00000126215	XRCC3	chr14	103697609	103715504	189.698	162.813	216.582	0.40951	0.00162807	0.0510154
ENSG00000145730	PAM	chr5	102753981	103031105	684.209	734.954	633.464	-0.214078	0.00164065	0.0512912
ENSG00000143190	POU2F1	chr1	167220829	167427345	714.365	663.16	765.57	0.206886	0.00164864	0.051322
ENSG00000160961	ZNF333	chr19	14689801	14733746	165.632	141.407	189.858	0.42248	0.0016492	0.051322
ENSG00000065308	TRAM2	chr6	52497402	52576915	916.279	975.407	857.151	-0.18625	0.00165611	0.0514189
ENSG00000158486	DNAH3	chr16	20933111	21159441	9.10435	3.42471	14.784	1.83481	0.00166314	0.0515194
ENSG00000115661	STK16	chr2	219245455	219250337	102.3	83.1512	121.448	0.541116	0.00167652	0.0518155
ENSG00000172361	CFAP53	chr18	50227193	50266522	22.8104	13.9284	31.6924	1.13089	0.00168685	0.0520162
ENSG00000067225	PKM	chr15	72199029	72231822	1319.36	1392.23	1246.49	-0.159409	0.00169322	0.0520943
ENSG00000172766	NAA16	chr13	41311205	41377030	554.308	508.374	600.241	0.239219	0.00171066	0.0525075
ENSG00000204947	ZNF425	chr7	149102784	149126346	78.8909	62.1061	95.6756	0.615373	0.00171439	0.0525075
ENSG00000154803	FLCN	chr17	17212212	17237188	199.024	172.153	225.895	0.389977	0.00174428	0.0530638
ENSG00000163513	TGFBR2	chr3	30606502	30694142	1406.35	1480.54	1332.15	-0.152262	0.00174367	0.0530638
ENSG00000166033	HTRA1	chr10	122458551	122514908	335.879	370.727	301.03	-0.299551	0.00173676	0.0530638
ENSG00000105514	RAB3D	chr19	11322046	11346270	118.472	139.644	97.3001	-0.516778	0.00175311	0.0532131
ENSG00000111785	RIC8B	chr12	106774595	106889316	357.949	322.183	393.714	0.288456	0.00176091	0.0533304
ENSG00000154642	C21orf91	chr21	17788967	17819386	331.545	297.068	366.022	0.300224	0.00176756	0.0534127
ENSG00000011426	ANLN	chr7	36389806	36453791	1804.89	1887.96	1721.82	-0.13282	0.0017783	0.0534988
ENSG00000114670	NEK11	chr3	131026850	131350465	84.1705	66.3214	102.02	0.613782	0.0017746	0.0534988
ENSG00000074660	SCARF1	chr17	1633858	1645747	148.727	172.065	125.389	-0.453438	0.00179829	0.0536994
ENSG00000102763	VWA8	chr13	41566837	41961120	382.333	345.346	419.32	0.279272	0.0018008	0.0536994
ENSG00000153113	CAST	chr5	96525267	96779595	1619.61	1700.97	1538.25	-0.144981	0.00180024	0.0536994
ENSG00000196118	CCDC189	chr16	30757423	30762710	41.201	29.0089	53.3932	0.858037	0.00180063	0.0536994
ENSG00000103855	CD276	chr15	73683966	73714518	271.258	302.444	240.072	-0.331967	0.00180592	0.0537341
ENSG00000151164	RAD9B	chr12	110501655	110532086	21.0443	12.5888	29.4998	1.16638	0.00183023	0.0540654
ENSG00000159256	MORC3	chr21	36320189	36386148	672.454	623.485	721.423	0.210178	0.00183258	0.0540654
ENSG00000187535	IFT140	chr16	1510427	1612110	231.789	203.604	259.974	0.351068	0.001833	0.0540654
ENSG00000196611	MMP1	chr11	102789920	102798160	401.673	439.092	364.254	-0.268906	0.00182802	0.0540654
ENSG00000026508	CD44	chr11	35138870	35232402	1862.51	1948.59	1776.44	-0.133366	0.00186693	0.0548461
ENSG00000107295	SH3GL2	chr9	17579082	17797129	8.38876	3.08848	13.689	1.8451	0.00186755	0.0548461
ENSG00000182973	CNOT10	chr3	32685145	32773875	476.122	435.051	517.194	0.248996	0.00187436	0.0549272
ENSG00000142798	HSPG2	chr1	21822245	21937297	1380.45	1451.92	1308.98	-0.149412	0.00188039	0.0549853
ENSG00000139289	PHLDA1	chr12	76025447	76033932	642.729	693.333	592.126	-0.227291	0.00190263	0.0552781
ENSG00000158683	PKD1L1	chr7	47740202	47948491	23.4852	14.3965	32.5738	1.12473	0.00190105	0.0552781
ENSG00000176927	EFCAB5	chr17	29929200	30108452	26.1659	16.7497	35.5821	1.04335	0.001895	0.0552781
ENSG00000047621	C12orf4	chr12	4487728	4538508	474.467	434.182	514.753	0.24506	0.00191914	0.0556387
ENSG00000023445	BIRC3	chr11	102317450	102339403	57.8618	43.8005	71.9231	0.702861	0.00198431	0.056098
ENSG00000072274	TFRC	chr3	196027183	196082189	943.207	1002.54	883.874	-0.181555	0.0019411	0.056098
ENSG00000118507	AKAP7	chr6	131135666	131283535	110.81	91.1322	130.487	0.513142	0.00196926	0.056098
ENSG00000139826	ABHD13	chr13	108218379	108234255	493.581	452.05	535.111	0.242862	0.00195711	0.056098
ENSG00000147862	NFIB	chr9	14081843	14398983	1445.49	1524.79	1366.2	-0.158331	0.00198139	0.056098
ENSG00000162643	WDR63	chr1	84999147	85133138	13.7805	6.81359	20.7475	1.47679	0.00197844	0.056098
ENSG00000163935	SFMBT1	chr3	52903572	53046750	276.107	245.39	306.824	0.321163	0.00196509	0.056098
ENSG00000168813	ZNF507	chr19	32345594	32387667	801.142	748.794	853.489	0.188567	0.00198207	0.056098
ENSG00000168944	CEP120	chr5	123344885	123423592	615.917	567.81	664.024	0.22546	0.0019846	0.056098
ENSG00000177679	SRRM3	chr7	76201900	76287288	10.3182	4.46261	16.1738	1.65254	0.00194756	0.056098
ENSG00000197050	ZNF420	chr19	37007857	37130314	129.61	108.478	150.743	0.47099	0.00194772	0.056098
ENSG00000197062	ZSCAN26	chr6	28267010	28278224	165.579	141.746	189.413	0.415685	0.0019829	0.056098
ENSG00000197302	ZNF720	chr16	31713229	31794869	195.912	169.786	222.037	0.38509	0.00199609	0.0563054
ENSG00000179406	LINC00174	chr7	66376044	66493566	24.134	14.8668	33.4012	1.11645	0.00200839	0.0565349
ENSG00000100578	KIAA0586	chr14	58427385	58551289	712.827	663.313	762.341	0.200466	0.00201655	0.0566471
ENSG00000188153	COL4A5	chrX	108439844	108697545	502.62	545.49	459.751	-0.246206	0.00204425	0.0573065
ENSG00000204599	TRIM39	chr6	30326479	30343729	127.776	106.056	149.496	0.491359	0.00205848	0.0575865
ENSG00000186470	BTN3A2	chr6	26365159	26378320	240.186	269.705	210.668	-0.354919	0.00207095	0.0578162
ENSG00000171169	NAIF1	chr9	128061233	128068206	130.907	109.854	151.959	0.46449	0.0020792	0.0579273
ENSG00000121289	CEP89	chr19	32875925	32971991	530.084	487.718	572.449	0.230663	0.00209184	0.058114
ENSG00000155530	LRGUK	chr7	134127299	134264591	14.6277	7.31969	21.9356	1.46299	0.00209447	0.058114
ENSG00000171992	SYNPO	chr5	150601080	150659220	924.6	982.533	866.667	-0.180833	0.00213743	0.0591849
ENSG00000025434	NR1H3	chr11	47248300	47269032	47.8176	35.2115	60.4237	0.762345	0.00215181	0.0594043
ENSG00000176809	LRRC37A3	chr17	64854312	64919480	45.0763	32.9295	57.223	0.779046	0.00215411	0.0594043
ENSG00000109971	HSPA8	chr11	123057489	123063230	1637.72	1720.96	1554.47	-0.146696	0.0021628	0.0595232
ENSG00000250251	PKD1P6	chr16	15125242	15154564	82.2747	65.3437	99.2057	0.594933	0.0021672	0.0595235
ENSG00000102904	TSNAXIP1	chr16	67806765	67832148	34.0729	23.3995	44.7463	0.906802	0.00218096	0.0596657
ENSG00000130816	DNMT1	chr19	10133345	10231286	1489.86	1416.52	1563.19	0.142043	0.00218118	0.0596657
ENSG00000245958	AC093752.1	chr4	119454791	119552025	89.2511	71.7848	106.717	0.565543	0.00219593	0.0599483
ENSG00000151725	CENPU	chr4	184694618	184734133	632.267	585.504	679.031	0.213458	0.00220772	0.0600288
ENSG00000168685	IL7R	chr5	35852695	35879603	616.612	662.091	571.133	-0.212857	0.00220386	0.0600288
ENSG00000134013	LOXL2	chr8	23297189	23425328	857.388	912.381	802.395	-0.185108	0.0022194	0.0602256
ENSG00000091136	LAMB1	chr7	107923799	108003255	1599.51	1677.16	1521.87	-0.14008	0.00224404	0.0607379
ENSG00000146006	LRRTM2	chr5	138868923	138875368	27.3972	17.4863	37.3081	1.05119	0.00224733	0.0607379
ENSG00000185246	PRPF39	chr14	45084099	45116282	619.279	573.735	664.824	0.212242	0.00225171	0.0607379
ENSG00000100345	MYH9	chr22	36281277	36388067	3104.51	3221.71	2987.31	-0.108944	0.002291	0.061553
ENSG00000161298	ZNF382	chr19	36604817	36634113	57.1869	43.0869	71.2869	0.713384	0.00228944	0.061553
ENSG00000038002	AGA	chr4	177430770	177442503	68.8826	53.6397	84.1254	0.63964	0.00231558	0.0620906
ENSG00000172530	BANP	chr16	87949244	88077318	208.983	182.621	235.345	0.364164	0.00233102	0.0623813
ENSG00000141367	CLTC	chr17	59619689	59696956	2563.78	2663.55	2464	-0.112301	0.00234331	0.0625866
ENSG00000101544	ADNP2	chr18	80109031	80147523	564.669	521.564	607.775	0.220302	0.00236155	0.0628105
ENSG00000107077	KDM4C	chr9	6720863	7175648	327.964	294.384	361.544	0.295564	0.00236558	0.0628105
ENSG00000118307	CASC1	chr12	25108420	25195162	14.2401	7.38471	21.0955	1.39792	0.00236456	0.0628105
ENSG00000109618	SEPSECS	chr4	25120014	25160442	167.843	143.443	192.243	0.419909	0.00239212	0.0632676
ENSG00000111445	RFC5	chr12	118013588	118033130	410.862	373.336	448.388	0.263629	0.00239191	0.0632676
ENSG00000064687	ABCA7	chr19	1040101	1065572	82.0191	64.7872	99.2509	0.607737	0.0024341	0.0638799
ENSG00000075213	SEMA3A	chr7	83955777	84492724	606.628	655.922	557.335	-0.234593	0.0024316	0.0638799
ENSG00000117152	RGS4	chr1	163068775	163076802	1498.3	1574.06	1422.53	-0.145939	0.0024283	0.0638799
ENSG00000136925	TSTD2	chr9	97600080	97633575	423.911	385.725	462.098	0.26001	0.00242965	0.0638799
ENSG00000158859	ADAMTS4	chr1	161184308	161199056	154.337	176.83	131.844	-0.420761	0.00243911	0.0638878
ENSG00000182158	CREB3L2	chr7	137874979	138002067	712.878	763.757	661.999	-0.205995	0.0024585	0.0642715
ENSG00000119638	NEK9	chr14	75079353	75127344	638.809	592.645	684.974	0.208553	0.00247431	0.0644366
ENSG00000147394	ZNF185	chrX	152914442	152973480	844.497	897.674	791.321	-0.181714	0.00247081	0.0644366
ENSG00000151702	FLI1	chr11	128686535	128813267	482.68	523.855	441.505	-0.246227	0.00249969	0.0649729
ENSG00000115415	STAT1	chr2	190964358	191020960	1894.66	1815.34	1973.97	0.120795	0.00251929	0.0653569
ENSG00000089916	GPATCH2L	chr14	76151916	76254342	630.198	583.346	677.05	0.21457	0.00253459	0.0655033
ENSG00000163904	SENP2	chr3	185582496	185633551	474.179	435.074	513.283	0.237991	0.0025311	0.0655033
ENSG00000047849	MAP4	chr3	47850690	48089272	1893.39	1973.46	1813.33	-0.122019	0.00255118	0.065778
ENSG00000080298	RFX3	chr9	3218297	3526004	241.494	213.221	269.767	0.337957	0.00255976	0.065778
ENSG00000101849	TBL1X	chrX	9463295	9741037	360.433	395.351	325.516	-0.279626	0.00255688	0.065778
ENSG00000126777	KTN1	chr14	55559072	55701526	2191.68	2286.77	2096.58	-0.12521	0.00256697	0.0658387
ENSG00000228775	WEE2-AS1	chr7	141704338	141738346	9.91306	4.19273	15.6334	1.67952	0.00261579	0.0669641
ENSG00000160145	KALRN	chr3	124080023	124726325	291.875	322.911	260.84	-0.306911	0.00263153	0.0672403
ENSG00000108622	ICAM2	chr17	64002594	64020634	187.965	213.58	162.351	-0.393537	0.00264139	0.0673654
ENSG00000197746	PSAP	chr10	71816298	71851375	827.779	880.207	775.351	-0.182771	0.00266054	0.067659
ENSG00000272323	AC026801.2	chr5	34837549	34839278	10.5968	4.76567	16.428	1.59584	0.00266287	0.067659
ENSG00000179776	CDH5	chr16	66366622	66404786	953.905	1009.64	898.175	-0.168589	0.00268771	0.0681623
ENSG00000166704	ZNF606	chr19	57977053	58003349	129.061	108.757	149.365	0.454155	0.00273458	0.0692216
ENSG00000111727	HCFC2	chr12	104064457	104106524	638.088	592.917	683.258	0.204279	0.00278797	0.0703107
ENSG00000197557	TTC30A	chr2	177612992	177618966	114.556	95.287	133.826	0.485682	0.00278331	0.0703107
ENSG00000135540	NHSL1	chr6	138422043	138692571	810.03	862.497	757.563	-0.186921	0.00279923	0.0704636
ENSG00000055483	USP36	chr17	78787381	78841441	687.656	639.791	735.52	0.20087	0.00282537	0.0705977
ENSG00000150938	CRIM1	chr2	36355926	36551135	2416.83	2509.14	2324.52	-0.110216	0.00281151	0.0705977
ENSG00000166578	IQCD	chr12	113195441	113221094	19.9681	12.0177	27.9185	1.15152	0.00282101	0.0705977
ENSG00000228409	CCT6P1	chr7	65751142	65763354	101.936	83.9436	119.929	0.509583	0.00282528	0.0705977
ENSG00000118007	STAG1	chr3	136336233	136752403	1198.02	1136.01	1260.04	0.149372	0.00283331	0.070666
ENSG00000136237	RAPGEF5	chr7	22118238	22357144	585.211	629.255	541.167	-0.217198	0.00284521	0.0708327
ENSG00000174456	C12orf76	chr12	110027028	110073686	48.8097	36.4511	61.1683	0.73117	0.00286129	0.0711025
ENSG00000071127	WDR1	chr4	10074339	10116949	1281.2	1346.9	1215.5	-0.147974	0.00292945	0.0726351
ENSG00000083799	CYLD	chr16	50742050	50801935	547.251	505.293	589.209	0.221253	0.00293902	0.0726351
ENSG00000135338	LCA5	chr6	79484991	79537458	335.44	302.316	368.563	0.284998	0.00293532	0.0726351
ENSG00000078070	MCCC1	chr3	183015218	183116075	203.368	177.934	228.802	0.360964	0.00296665	0.0730517
ENSG00000100815	TRIP11	chr14	91965991	92040896	1294.86	1230.69	1359.03	0.143004	0.00296225	0.0730517
ENSG00000002016	RAD52	chr12	912077	990053	122.306	102.195	142.416	0.474828	0.00299964	0.0737304
ENSG00000225791	TRAM2-AS1	chr6	52577307	52583993	71.0559	55.5005	86.6113	0.632853	0.00302248	0.0741574
ENSG00000152359	POC5	chr5	75674124	75717481	242.309	214.621	269.996	0.329774	0.00303615	0.0743582
ENSG00000269439	AC010618.3	chr19	17488990	17511889	22.8289	14.2633	31.3946	1.08568	0.00304772	0.0745071
ENSG00000094804	CDC6	chr17	40287633	40304657	920.167	863.988	976.347	0.176192	0.00306576	0.0747554
ENSG00000231305	AC112484.1	chr3	128861313	128871540	10.1114	4.49579	15.7269	1.60577	0.00306889	0.0747554
ENSG00000117724	CENPF	chr1	214603195	214664588	2529.88	2631.51	2428.25	-0.115929	0.00311738	0.0758003
ENSG00000168077	SCARA3	chr8	27633868	27676776	531.011	573.068	488.954	-0.228576	0.00313123	0.076001
ENSG00000103942	HOMER2	chr15	82836946	82986153	26.8936	17.7186	36.0685	0.985725	0.00314305	0.0761517
ENSG00000104332	SFRP1	chr8	41261958	41309497	112.248	131.531	92.9654	-0.496123	0.00314954	0.0761728
ENSG00000135048	CEMIP2	chr9	71683366	71816690	358.89	393.213	324.567	-0.276022	0.00316207	0.076183
ENSG00000136830	FAM129B	chr9	127505339	127578989	982.033	1037.84	926.228	-0.163976	0.0031668	0.076183
ENSG00000215041	NEURL4	chr17	7315628	7329393	231.345	203.62	259.07	0.345956	0.00316049	0.076183
ENSG00000110841	PPFIBP1	chr12	27523431	27695564	1200.47	1267.18	1133.76	-0.160376	0.00318787	0.0765541
ENSG00000172888	ZNF621	chr3	40524878	40574685	458.105	420.054	496.156	0.239693	0.00320593	0.0768517
ENSG00000196230	TUBB	chr6	30720201	30725426	1279.77	1348.32	1211.23	-0.154571	0.00321203	0.0768621
ENSG00000227617	CERS6-AS1	chr2	168771953	168786961	15.6381	8.49078	22.7854	1.32548	0.0032709	0.0781331
ENSG00000186472	PCLO	chr7	82754013	83162930	22.203	13.9351	30.471	1.07532	0.0032801	0.0782151
ENSG00000124486	USP9X	chrX	41085635	41236579	1784.95	1861.93	1707.96	-0.124452	0.00329013	0.0783165
ENSG00000139438	FAM222A	chr12	109714228	109770507	40.0461	28.4179	51.6743	0.840407	0.00329688	0.0783399
ENSG00000074935	TUBE1	chr6	112070777	112087529	225.452	199.049	251.856	0.337963	0.00331121	0.0785429
ENSG00000039560	RAI14	chr5	34656237	34832627	1297.04	1361.26	1232.82	-0.142867	0.00335966	0.0793215
ENSG00000074527	NTN4	chr12	95657807	95791152	707.743	757.826	657.66	-0.204236	0.00336158	0.0793215
ENSG00000127663	KDM4B	chr19	4969113	5153595	401.262	365.496	437.028	0.257226	0.00335151	0.0793215
ENSG00000135951	TSGA10	chr2	98997261	99154964	31.9498	21.9821	41.9176	0.901057	0.00338457	0.0797254
ENSG00000241973	PI4KA	chr22	20707691	20859417	536.912	496.395	577.428	0.217745	0.00339172	0.0797553
ENSG00000011143	MKS1	chr17	58205437	58219605	112.429	93.808	131.049	0.477997	0.00343292	0.0804921
ENSG00000169908	TM4SF1	chr3	149369022	149377865	509.217	551.922	466.512	-0.242071	0.00343492	0.0804921
ENSG00000153237	CCDC148	chr2	158171081	158456753	16.421	9.39549	23.4465	1.23367	0.00347097	0.0808052
ENSG00000175820	CCDC168	chr13	102729369	102759070	50.8002	38.0567	63.5438	0.72471	0.0034721	0.0808052
ENSG00000177853	ZNF518A	chr10	96129715	96205288	456.442	417.451	495.433	0.24654	0.0034695	0.0808052
ENSG00000197343	ZNF655	chr7	99558406	99576453	717.604	669.171	766.037	0.194767	0.00346775	0.0808052
ENSG00000138834	MAPK8IP3	chr16	1706183	1770317	296.92	266.774	327.067	0.292976	0.00348742	0.0810229
ENSG00000155906	RMND1	chr6	151404762	151452181	226.971	200.788	253.154	0.332861	0.00349516	0.0810639
ENSG00000137171	KLC4	chr6	43040777	43075099	82.2105	66.4612	97.9599	0.552785	0.00350611	0.081179
ENSG00000152454	ZNF256	chr19	57940833	57947675	57.9117	44.4119	71.4114	0.673146	0.00352782	0.0813551
ENSG00000165891	E2F7	chr12	77021247	77065580	812.178	762.064	862.291	0.178041	0.0035317	0.0813551
ENSG00000170275	CRTAP	chr3	33113979	33147773	770.375	819.137	721.613	-0.182642	0.00352997	0.0813551
ENSG00000133106	EPSTI1	chr13	42886388	42992271	405.299	369.663	440.936	0.25373	0.00356563	0.0819975
ENSG00000168152	THAP9	chr4	82900684	82919969	92.2922	75.49	109.094	0.525399	0.00357799	0.0821424
ENSG00000163399	ATP1A1	chr1	116372668	116410261	1131.43	1193.93	1068.93	-0.159408	0.00361135	0.0827683
ENSG00000148343	MIGA2	chr9	129036621	129072082	209.266	183.918	234.614	0.349542	0.00362324	0.0829007
ENSG00000196652	ZKSCAN5	chr7	99504651	99534700	426.029	388.745	463.313	0.252567	0.00364218	0.0831938
ENSG00000123933	MXD4	chr4	2247432	2262294	206.376	231.681	181.07	-0.353859	0.0036854	0.0840395
ENSG00000124370	MCEE	chr2	71109684	71130239	57.0493	43.831	70.2676	0.668749	0.00370421	0.0843266
ENSG00000138286	FAM149B1	chr10	73168166	73244504	177.882	153.263	202.501	0.399645	0.00371245	0.0843727
ENSG00000178966	RMI1	chr9	83980711	84004074	355.014	322.39	387.637	0.265148	0.00371877	0.0843751
ENSG00000163297	ANTXR2	chr4	79901149	80125454	360.319	394.141	326.496	-0.270889	0.00376412	0.0852613
ENSG00000120370	GORAB	chr1	170532129	170553446	180.852	157.759	203.945	0.368395	0.00377787	0.0854303
ENSG00000085733	CTTN	chr11	70398404	70436584	937.917	992.733	883.1	-0.16865	0.003792	0.0856071
ENSG00000111725	PRKAB1	chr12	119667753	119681630	194.634	170.488	218.781	0.357963	0.00380623	0.0857856
ENSG00000196670	ZFP62	chr5	180847611	180861285	251.696	223.834	279.557	0.319433	0.0038314	0.0862097
ENSG00000079134	THOC1	chr18	214520	268050	703.486	656.888	750.083	0.191131	0.00384059	0.0862735
ENSG00000197063	MAFG	chr17	81918270	81927714	390.505	355.632	425.378	0.257696	0.00384718	0.0862785
ENSG00000131473	ACLY	chr17	41866908	41930542	1318.25	1384	1252.51	-0.143913	0.00385893	0.0863992
ENSG00000101040	ZMYND8	chr20	47209214	47356889	862.878	915.697	810.059	-0.176638	0.00394542	0.0874196
ENSG00000116127	ALMS1	chr2	73385758	73610793	1148.83	1082.52	1215.14	0.166579	0.00392486	0.0874196
ENSG00000127481	UBR4	chr1	19074506	19210276	3113.18	3013.21	3213.15	0.0926556	0.00393289	0.0874196
ENSG00000136021	SCYL2	chr12	100267140	100341724	918.119	865.807	970.432	0.164403	0.0039496	0.0874196
ENSG00000153879	CEBPG	chr19	33373330	33382686	474.45	436.838	512.061	0.228732	0.00394197	0.0874196
ENSG00000162971	TYW5	chr2	199929975	199955736	240.362	213.122	267.602	0.327039	0.00394199	0.0874196
ENSG00000173068	BNC2	chr9	16409503	16870843	198.802	223.515	174.09	-0.358722	0.00393482	0.0874196
ENSG00000184009	ACTG1	chr17	81509971	81523847	1280.03	1345.9	1214.16	-0.148497	0.00396162	0.0875428
ENSG00000107890	ANKRD26	chr10	26991914	27100498	778.175	729.26	827.091	0.181378	0.00401377	0.0885509
ENSG00000066056	TIE1	chr1	43300993	43323108	724.76	772.746	676.775	-0.191053	0.00402971	0.0887583
ENSG00000150760	DOCK1	chr10	126905409	127452517	784.449	835.33	733.567	-0.187178	0.00404776	0.0890113
ENSG00000078098	FAP	chr2	162170684	162245151	42.664	30.902	54.4259	0.796912	0.00406096	0.0891121
ENSG00000187951	AC091057.1	chr15	30658717	30772993	202.358	178.009	226.706	0.34714	0.00406547	0.0891121
ENSG00000167601	AXL	chr19	41219203	41261766	1471.52	1542.39	1400.66	-0.138966	0.00407726	0.0892263
ENSG00000141013	GAS8	chr16	90019629	90044975	223.592	197.691	249.493	0.334242	0.00411752	0.0896733
ENSG00000198464	ZNF480	chr19	52297177	52325922	361.291	328.123	394.46	0.264907	0.00411354	0.0896733
ENSG00000262049	AC139530.1	chr17	81701324	81703300	25.3904	16.6515	34.1294	0.992891	0.00411697	0.0896733
ENSG00000051341	POLQ	chr3	121431427	121546641	800.789	752.326	849.252	0.174616	0.00417737	0.0904262
ENSG00000146221	TCTE1	chr6	44278743	44297688	9.32096	4.13035	14.5116	1.59621	0.00417459	0.0904262
ENSG00000188811	NHLRC3	chr13	39038306	39050109	257.269	228.878	285.659	0.318465	0.00417188	0.0904262
ENSG00000231312	AC007388.1	chr2	39436637	39665343	31.7276	22.0869	41.3682	0.875906	0.00417875	0.0904262
ENSG00000139496	NUP58	chr13	25301524	25349800	983.835	927.931	1039.74	0.163964	0.00420091	0.0906168
ENSG00000142949	PTPRF	chr1	43525187	43623666	1109.22	1167.56	1050.87	-0.151776	0.00419638	0.0906168
ENSG00000116984	MTR	chr1	236795281	236903981	1191.72	1252.08	1131.36	-0.146143	0.00424892	0.0913629
ENSG00000127329	PTPRB	chr12	70515866	70637440	987.062	1042.95	931.174	-0.163382	0.00424897	0.0913629
ENSG00000171388	APLN	chrX	129645259	129654937	300.812	354.95	246.674	-0.523235	0.0042587	0.0914063
ENSG00000214765	SEPT7P2	chr7	45723780	45768985	230.309	204.178	256.441	0.327371	0.00426446	0.0914063
ENSG00000134824	FADS2	chr11	61792980	61867354	360.698	393.87	327.527	-0.265367	0.00429229	0.0918576
ENSG00000152952	PLOD2	chr3	146069440	146163653	1495.57	1565.7	1425.44	-0.135307	0.00430757	0.0918948
ENSG00000196878	LAMB3	chr1	209614870	209652466	79.2418	94.4155	64.0682	-0.55227	0.00430148	0.0918948
ENSG00000002834	LASP1	chr17	38869859	38921770	987.538	1046.68	928.397	-0.17283	0.00434236	0.0924915
ENSG00000135052	GOLM1	chr9	86026146	86100173	695.726	741.867	649.585	-0.191368	0.00437028	0.0929404
ENSG00000010219	DYRK4	chr12	4562204	4615302	55.8382	43.1984	68.4779	0.652562	0.00438639	0.0929915
ENSG00000264247	LINC00909	chr18	74591774	74598508	91.2267	74.7405	107.713	0.521385	0.00438059	0.0929915
ENSG00000068784	SRBD1	chr2	45388680	45612165	339.021	307.101	370.941	0.271672	0.00439462	0.0930207
ENSG00000180353	HCLS1	chr3	121631399	121660927	325.213	356.26	294.166	-0.275447	0.00442186	0.0933165
ENSG00000225077	LINC00337	chr1	6234692	6239444	10.2644	4.79884	15.7299	1.52859	0.00442236	0.0933165
ENSG00000205704	LINC00634	chr22	41952165	41958933	8.25778	3.42471	13.0908	1.6711	0.00443195	0.0933739
ENSG00000154783	FGD5	chr3	14810853	14934565	798.741	847.792	749.69	-0.177194	0.00446025	0.0938242
ENSG00000164938	TP53INP1	chr8	94925972	94949411	175.512	152.446	198.578	0.379223	0.00447334	0.0938364
ENSG00000197857	ZNF44	chr19	12224686	12294887	179.204	156.035	202.374	0.373056	0.00447466	0.0938364
ENSG00000115310	RTN4	chr2	54972187	55112621	1231.32	1291.65	1170.99	-0.141377	0.00452339	0.094712
ENSG00000085465	OVGP1	chr1	111414314	111427777	19.0705	11.385	26.756	1.16421	0.00459512	0.0956236
ENSG00000112242	E2F3	chr6	20401906	20493715	530.761	491.073	570.449	0.215752	0.00459231	0.0956236
ENSG00000144810	COL8A1	chr3	99638475	99799226	847.91	904.457	791.362	-0.192488	0.00458948	0.0956236
ENSG00000148814	LRRC27	chr10	132332154	132379918	50.4591	38.3698	62.5484	0.690764	0.00458413	0.0956236
ENSG00000104805	NUCB1	chr19	48900050	48923372	347.408	380.137	314.68	-0.271848	0.004638	0.0962318
ENSG00000136161	RCBTB2	chr13	48488959	48533256	87.8018	71.8073	103.796	0.525431	0.00464562	0.0962318
ENSG00000156802	ATAD2	chr8	123319850	123416350	1815.74	1741.42	1890.05	0.118094	0.00464357	0.0962318
ENSG00000101216	GMEB2	chr20	63587602	63627041	258.91	231.745	286.075	0.302679	0.00470784	0.097372
ENSG00000117519	CNN3	chr1	94896949	94927278	632.448	675.867	589.028	-0.198089	0.00472967	0.0976744
ENSG00000128641	MYO1B	chr2	191245185	191425389	603.519	646.127	560.912	-0.203704	0.00478035	0.0985711
ENSG00000185808	PIGP	chr21	37059170	37073170	59.3812	46.2572	72.5053	0.637315	0.00479615	0.0987467
ENSG00000124422	USP22	chr17	20999593	21043760	984.159	1038.68	929.636	-0.159852	0.0048052	0.0987833
ENSG00000128408	RIBC2	chr22	45413691	45432496	72.7215	57.4188	88.0242	0.607766	0.00486715	0.0990068
ENSG00000129625	REEP5	chr5	112876379	112922539	733.985	780.087	687.883	-0.181222	0.00486376	0.0990068
ENSG00000136826	KLF4	chr9	107484852	107490482	241.913	214.852	268.974	0.322779	0.00485014	0.0990068
ENSG00000161638	ITGA5	chr12	54395261	54419460	1664.38	1734.9	1593.86	-0.122259	0.0048631	0.0990068
ENSG00000197712	FAM114A1	chr4	38867677	38945739	241.444	268.301	214.586	-0.320957	0.00486715	0.0990068
ENSG00000226314	ZNF192P1	chr6	28161769	28169594	20.0958	12.4866	27.7049	1.08977	0.00485764	0.0990068
ENSG00000246089	AC016065.1	chr8	6403551	6407142	17.4367	10.2702	24.6033	1.18382	0.00483979	0.0990068
ENSG00000160957	RECQL4	chr8	144511288	144517845	275.928	247.461	304.395	0.297659	0.00489455	0.0993073
ENSG00000179818	PCBP1-AS1	chr2	69962263	70103220	89.8527	73.3722	106.333	0.529261	0.00489656	0.0993073
ENSG00000106701	FSD1L	chr9	105447796	105552433	247.048	220.658	273.437	0.308139	0.0049538	0.100169
ENSG00000122741	DCAF10	chr9	37800502	37867666	738.523	692.449	784.597	0.179999	0.00495065	0.100169
ENSG00000166250	CLMP	chr11	123069865	123195281	395.43	428.982	361.878	-0.244792	0.00496741	0.100294
ENSG00000168439	STIP1	chr11	64185272	64204543	666.399	711.613	621.184	-0.195776	0.0049749	0.100296
ENSG00000163596	ICA1L	chr2	202773150	202871985	115.962	97.4344	134.49	0.460949	0.0050156	0.100967
ENSG00000163931	TKT	chr3	53224707	53256052	734.45	782.001	686.9	-0.186815	0.00505191	0.101547
ENSG00000121988	ZRANB3	chr2	135136916	135531236	153.147	132.454	173.84	0.3897	0.00510012	0.102365
ENSG00000154229	PRKCA	chr17	66302636	66810743	1205.04	1263.74	1146.34	-0.140544	0.00513839	0.10298
ENSG00000123870	ZNF137P	chr19	52588505	52597345	35.2525	25.4116	45.0933	0.803383	0.00515327	0.103126
ENSG00000086061	DNAJA1	chr9	33025211	33039907	727.436	773.068	681.805	-0.180987	0.00517684	0.103445
ENSG00000109790	KLHL5	chr4	39045039	39126857	375.855	408.554	343.156	-0.250991	0.00519454	0.103646
ENSG00000214814	FER1L6	chr8	123851987	124120061	17.9201	10.4705	25.3696	1.20094	0.00522117	0.104025
ENSG00000150093	ITGB1	chr10	32900319	33005792	1250.67	1311.21	1190.12	-0.139687	0.00523645	0.104176
ENSG00000035862	TIMP2	chr17	78852977	78925387	1023.16	1079.11	967.214	-0.157777	0.00531938	0.105097
ENSG00000114841	DNAH1	chr3	52316319	52400491	140.725	119.953	161.497	0.425972	0.00530618	0.105097
ENSG00000142634	EFHD2	chr1	15409895	15430343	477.515	515.108	439.923	-0.227146	0.00530501	0.105097
ENSG00000152443	ZNF776	chr19	57746796	57758159	202.165	178.414	225.915	0.338859	0.00529354	0.105097
ENSG00000159228	CBR1	chr21	36069941	36073166	226.058	251.558	200.558	-0.325421	0.00532145	0.105097
ENSG00000108984	MAP2K6	chr17	69414698	69553861	104.877	124.242	85.5118	-0.533753	0.00534942	0.105496
ENSG00000104765	BNIP3L	chr8	26382898	26505636	537.83	577.775	497.885	-0.214295	0.00538693	0.106081
ENSG00000128849	CGNL1	chr15	57375967	57550727	158.546	179.913	137.179	-0.38875	0.00540667	0.106162
ENSG00000184949	FAM227A	chr22	38578120	38656629	35.1003	25.2378	44.9629	0.808821	0.00540539	0.106162
ENSG00000114554	PLXNA1	chr3	126988594	127037392	626.952	669.017	584.888	-0.193573	0.0054193	0.106256
ENSG00000100504	PYGL	chr14	50857891	50944736	225.848	251.111	200.585	-0.322675	0.0054358	0.106426
ENSG00000131584	ACAP3	chr1	1292376	1309609	122.935	103.845	142.025	0.448017	0.00547262	0.106944
ENSG00000172828	CES3	chr16	66961237	66975148	9.57578	4.42943	14.7221	1.53392	0.00548593	0.106944
ENSG00000197170	PSMD12	chr17	67337916	67366627	904.956	955.413	854.499	-0.160868	0.00547876	0.106944
ENSG00000205189	ZBTB10	chr8	80485619	80526265	432.568	398.013	467.123	0.230454	0.00549738	0.107013
ENSG00000074800	ENO1	chr1	8861000	8879250	1256.34	1318.66	1194.02	-0.143129	0.00554492	0.10763
ENSG00000141905	NFIC	chr19	3314403	3469217	670.247	714.502	625.991	-0.190509	0.00554208	0.10763
ENSG00000143199	ADCY10	chr1	167809388	167914215	14.7643	8.38944	21.1392	1.23749	0.00555341	0.107641
ENSG00000175322	ZNF519	chr18	14057457	14132490	152.293	131.595	172.99	0.391976	0.00556566	0.107724
ENSG00000006062	MAP3K14	chr17	45263119	45317145	193.155	169.968	216.341	0.346232	0.00564678	0.108829
ENSG00000050344	NFE2L3	chr7	26152240	26187125	476.821	514.561	439.081	-0.228374	0.00563914	0.108829
ENSG00000168264	IRF2BP2	chr1	234604269	234609525	545.485	584.972	505.998	-0.208852	0.0056344	0.108829
ENSG00000152926	ZNF117	chr7	64971776	65006684	91.3881	75.4502	107.326	0.502788	0.00573516	0.110335
ENSG00000178567	EPM2AIP1	chr3	36985043	36993168	371.069	338.43	403.708	0.253768	0.00574605	0.110335
ENSG00000228486	C2orf92	chr2	97664217	97703064	24.0379	15.837	32.2387	0.981229	0.00574934	0.110335
ENSG00000171160	MORN4	chr10	97614553	97633500	49.2343	37.3669	61.1016	0.694767	0.00578716	0.110904
ENSG00000171320	ESCO2	chr8	27771949	27812640	788.772	742.35	835.195	0.169798	0.00580489	0.111025
ENSG00000176619	LMNB2	chr19	2427638	2456996	1275.31	1336.72	1213.91	-0.13892	0.00580984	0.111025
ENSG00000167680	SEMA6B	chr19	4542593	4559808	166.4	188.266	144.533	-0.37907	0.00583584	0.111365
ENSG00000043143	JADE2	chr5	134524312	134583230	632.854	677.886	587.822	-0.205338	0.00585333	0.111386
ENSG00000108666	C17orf75	chr17	32324565	32350023	179.95	156.839	203.062	0.370552	0.00584888	0.111386
ENSG00000169919	GUSB	chr7	65960684	65982314	319.672	290.217	349.128	0.26579	0.00587931	0.111723
ENSG00000110880	CORO1C	chr12	108645109	108731596	1335.94	1397.48	1274.4	-0.132901	0.00590068	0.111973
ENSG00000108771	DHX58	chr17	42101404	42112733	38.2083	28.1626	48.2541	0.756127	0.00593306	0.111977
ENSG00000143815	LBR	chr1	225401502	225428925	681.841	729.056	634.626	-0.19983	0.00593391	0.111977
ENSG00000151929	BAG3	chr10	119651370	119677819	520.522	558.726	482.318	-0.211749	0.00591153	0.111977
ENSG00000188643	S100A16	chr1	153606886	153613145	346.081	377.385	314.776	-0.260954	0.00592126	0.111977
ENSG00000067704	IARS2	chr1	220094102	220148041	750.717	797.818	703.617	-0.181028	0.00595497	0.11217
ENSG00000152503	TRIM36	chr5	115124762	115180546	24.939	16.6223	33.2558	0.958949	0.00596067	0.11217
ENSG00000010030	ETV7	chr6	36354091	36387800	18.167	11.2133	25.1207	1.09673	0.00598421	0.112457
ENSG00000069275	NUCKS1	chr1	205712819	205750276	2326.38	2417.35	2235.41	-0.112842	0.00600366	0.112666
ENSG00000166825	ANPEP	chr15	89784889	89815401	500.421	537.785	463.057	-0.215406	0.00602291	0.112871
ENSG00000065923	SLC9A7	chrX	46599252	46759172	149.875	170.491	129.259	-0.396747	0.00604315	0.113084
ENSG00000168010	ATG16L2	chr11	72814308	72843674	62.7463	49.5404	75.9523	0.606528	0.00605926	0.113084
ENSG00000186529	CYP4F3	chr19	15640897	15662825	11.9373	6.13847	17.7361	1.39214	0.00605393	0.113084
ENSG00000188315	C3orf62	chr3	49268602	49277909	104.603	87.6417	121.565	0.467487	0.00607746	0.113268
ENSG00000122862	SRGN	chr10	69088106	69104811	454.502	489.717	419.287	-0.223516	0.00610233	0.113575
ENSG00000122786	CALD1	chr7	134744252	134970728	1669.4	1736.93	1601.86	-0.116717	0.00613409	0.11401
ENSG00000071243	ING3	chr7	120950749	120977216	339.607	309.222	369.992	0.258088	0.00614315	0.114022
ENSG00000118432	CNR1	chr6	88139864	88166359	249.838	276.257	223.419	-0.305028	0.00616756	0.11407
ENSG00000119723	COQ6	chr14	73949926	73963670	99.2225	83.0039	115.441	0.471072	0.00616669	0.11407
ENSG00000166833	NAV2	chr11	19350724	20121598	1666.18	1734.42	1597.94	-0.118175	0.00617094	0.11407
ENSG00000112769	LAMA4	chr6	112108760	112254939	985.658	1089.53	881.787	-0.30489	0.00619017	0.11427
ENSG00000213762	ZNF134	chr19	57614233	57624723	211.704	186.937	236.471	0.337508	0.00622964	0.114842
ENSG00000152117	AC073869.1	chr2	131492813	131521573	116.751	98.8144	134.687	0.442963	0.00625561	0.115164
ENSG00000133561	GIMAP6	chr7	150625375	150632648	177.673	200.964	154.382	-0.378281	0.00630421	0.115863
ENSG00000183250	LINC01547	chr21	44932814	44939913	38.8647	28.6997	49.0297	0.752338	0.00631064	0.115863
ENSG00000111145	ELK3	chr12	96194382	96269835	923.748	973.744	873.753	-0.156147	0.00632966	0.116055
ENSG00000143537	ADAM15	chr1	155050566	155062775	335.679	366.93	304.428	-0.2686	0.0063628	0.116505
ENSG00000124356	STAMBP	chr2	73828916	73873659	552.309	513.748	590.87	0.201412	0.00639648	0.116964
ENSG00000217128	FNIP1	chr5	131641714	131797063	874.109	825.426	922.793	0.160685	0.00640746	0.117007
ENSG00000131171	SH3BGRL	chrX	81201943	81298547	241.696	267.232	216.159	-0.304731	0.00641958	0.117071
ENSG00000180626	ZNF594	chr17	5179536	5191883	134.747	115.31	154.183	0.415998	0.0064317	0.117135
ENSG00000134247	PTGFRN	chr1	116910057	116990358	419.481	453.866	385.096	-0.236482	0.00646536	0.117432
ENSG00000172901	LVRN	chr5	115962454	116027619	14.1024	7.79128	20.4135	1.28438	0.00645996	0.117432
ENSG00000167074	TEF	chr22	41367333	41399326	66.9633	53.2597	80.6668	0.589869	0.00649313	0.117622
ENSG00000175548	ALG10B	chr12	38316578	38329728	227.631	202.224	253.038	0.321971	0.00649268	0.117622
ENSG00000164331	ANKRA2	chr5	73552335	73565686	183.537	160.185	206.889	0.367092	0.00652409	0.118025
ENSG00000044574	HSPA5	chr9	125234853	125241330	1003.51	1056.74	950.292	-0.153021	0.00658626	0.118991
ENSG00000102786	INTS6	chr13	51354077	51454264	885.214	836.548	933.879	0.158608	0.00665816	0.1201
ENSG00000175455	CCDC14	chr3	123897305	123961408	756.273	711.008	801.539	0.172678	0.0066664	0.1201
ENSG00000187742	SECISBP2	chr9	89318506	89359662	423.831	390.136	457.525	0.229328	0.00667419	0.1201
ENSG00000244879	GABPB1-AS1	chr15	50354959	50372202	232.856	205.4	260.313	0.340332	0.00673367	0.12101
ENSG00000134531	EMP1	chr12	13196716	13219939	1106.45	1160.7	1052.21	-0.141446	0.00677381	0.12157
ENSG00000155545	MIER3	chr5	56919602	56971675	592.484	551.323	633.644	0.200435	0.00678581	0.121625
ENSG00000278259	MYO19	chr17	36495633	36543435	413.288	380.107	446.469	0.231594	0.00681724	0.122027
ENSG00000101974	ATP11C	chrX	139726346	139945276	819.129	866.826	771.433	-0.167996	0.00683816	0.122079
ENSG00000147065	MSN	chrX	65588377	65741931	1925.89	2001.54	1850.24	-0.113337	0.00683399	0.122079
ENSG00000204685	STARD7-AS1	chr2	96208416	96242621	44.7042	33.9714	55.437	0.690465	0.00686412	0.122382
ENSG00000116793	PHTF1	chr1	113696831	113759489	371.213	339.672	402.755	0.245094	0.00687574	0.122428
ENSG00000119707	RBM25	chr14	73058436	73123898	1199.75	1256.47	1143.04	-0.136382	0.00690813	0.122843
ENSG00000001617	SEMA3F	chr3	50155045	50189075	656.733	698.727	614.74	-0.18447	0.00693527	0.123004
ENSG00000092820	EZR	chr6	158765741	158819412	779.484	827.74	731.228	-0.178626	0.00693045	0.123004
ENSG00000165730	STOX1	chr10	68827541	68895432	41.4127	31.0515	51.7738	0.719431	0.00698176	0.123667
ENSG00000133393	FOPNL	chr16	15865720	15888625	296.945	325.315	268.575	-0.27558	0.00702718	0.123799
ENSG00000137814	HAUS2	chr15	42548810	42569994	452.337	417.709	486.966	0.220831	0.00703396	0.123799
ENSG00000143217	NECTIN4	chr1	161070995	161089599	15.3061	8.96237	21.6498	1.18494	0.00702309	0.123799
ENSG00000153904	DDAH1	chr1	85318481	85578363	874.501	924.443	824.558	-0.164775	0.007004	0.123799
ENSG00000154767	XPC	chr3	14145147	14178783	524.388	487.38	561.397	0.203585	0.00703708	0.123799
ENSG00000176542	USF3	chr3	113648385	113696646	680.914	634.898	726.931	0.195007	0.00704398	0.123799
ENSG00000168003	SLC3A2	chr11	62856102	62888875	559.899	521.346	598.453	0.198641	0.00708469	0.124353
ENSG00000108515	ENO3	chr17	4948092	4957131	18.8089	11.846	25.7718	1.05939	0.00711895	0.124793
ENSG00000118407	FILIP1	chr6	75291859	75493738	13.9359	7.81831	20.0535	1.25549	0.00721492	0.126197
ENSG00000148773	MKI67	chr10	128096659	128126385	3353.91	3459.99	3247.83	-0.0912656	0.00721762	0.126197
ENSG00000275832	ARHGAP23	chr17	38419280	38512392	668.199	710.305	626.094	-0.181786	0.00724819	0.126568
ENSG00000100201	DDX17	chr22	38483440	38507660	1477.43	1539.51	1415.35	-0.121233	0.00733645	0.127655
ENSG00000125812	GZF1	chr20	23362182	23373063	336.572	305.711	367.433	0.26452	0.00733865	0.127655
ENSG00000139971	ARMH4	chr14	57999735	58298139	17.7412	10.5042	24.9783	1.17514	0.00732022	0.127655
ENSG00000144893	MED12L	chr3	151085697	151437072	19.7146	12.3486	27.0807	1.07289	0.0073801	0.128212
ENSG00000011132	APBA3	chr19	3750819	3761699	56.1497	44.1036	68.1958	0.617443	0.00741653	0.128515
ENSG00000157510	AFAP1L1	chr5	149271871	149341802	329.087	357.907	300.267	-0.252568	0.00741154	0.128515
ENSG00000119408	NEK6	chr9	124257606	124353307	486.857	523.025	450.689	-0.214307	0.00746192	0.128972
ENSG00000196547	MAN2A2	chr15	90902218	90922584	349.592	319.454	379.729	0.248647	0.00745662	0.128972
ENSG00000162783	IER5	chr1	181088712	181092899	308.115	336.141	280.09	-0.262324	0.0075308	0.129997
ENSG00000006125	AP2B1	chr17	35578046	35726409	1401.02	1463.38	1338.67	-0.12841	0.0075967	0.130306
ENSG00000080189	SLC35C2	chr20	46345980	46364458	121.613	103.539	139.686	0.428442	0.00757326	0.130306
ENSG00000104967	NOVA2	chr19	45933734	45973546	209.173	232.672	185.675	-0.32395	0.00758339	0.130306
ENSG00000231365	AL359915.2	chr1	119140396	119275973	139.94	120.864	159.017	0.392949	0.00759636	0.130306
ENSG00000284976	BX255925.3	chr9	137217452	137219361	111.968	95.0521	128.883	0.435323	0.00758489	0.130306
ENSG00000178385	PLEKHM3	chr2	207821288	208025560	206.083	182.876	229.289	0.324713	0.00764107	0.130902
ENSG00000089775	ZBTB25	chr14	64449106	64505213	160.015	139.666	180.364	0.366613	0.00766365	0.131123
ENSG00000169604	ANTXR1	chr2	69013178	69249327	1124.15	1179.52	1068.78	-0.142114	0.00767358	0.131127
ENSG00000272994	AC012360.3	chr2	105334027	105337475	65.2953	51.8718	78.7188	0.592423	0.00772789	0.131889
ENSG00000187720	THSD4	chr15	71096952	71783383	281.552	308.659	254.445	-0.277666	0.00773936	0.131919
ENSG00000140104	CLBA1	chr14	104985775	105010482	55.4597	43.5014	67.418	0.620524	0.00777183	0.13217
ENSG00000156587	UBE2L6	chr11	57551656	57568284	191.53	214.227	168.833	-0.341748	0.00777355	0.13217
ENSG00000154175	ABI3BP	chr3	100749156	100993515	984.26	1035.62	932.898	-0.150552	0.00779743	0.13241
ENSG00000127554	GFER	chr16	1984207	1987749	151.362	131.162	171.562	0.384814	0.00781701	0.132576
ENSG00000133083	DCLK1	chr13	35768652	36131306	132.171	152.049	112.292	-0.433939	0.007851	0.132673
ENSG00000135473	PAN2	chr12	56316223	56334053	140.35	121.349	159.351	0.390231	0.00784653	0.132673
ENSG00000148180	GSN	chr9	121207794	121332843	315.417	344.119	286.715	-0.262453	0.00787158	0.132673
ENSG00000163320	CGGBP1	chr3	88051944	88149885	782.345	737.887	826.804	0.163935	0.00786125	0.132673
ENSG00000169429	CXCL8	chr4	73740506	73743716	106.95	123.31	90.5906	-0.440674	0.00787099	0.132673
ENSG00000226210	WASH8P	chr12	14522	32015	78.5505	64.5473	92.5536	0.513256	0.00789803	0.132953
ENSG00000104731	KLHDC4	chr16	87696485	87765992	307.193	278.032	336.354	0.273834	0.00797309	0.133538
ENSG00000133958	UNC79	chr14	93333219	93707876	10.7068	5.53501	15.8786	1.36893	0.0079711	0.133538
ENSG00000172795	DCP2	chr5	112976702	113020970	755.425	710.854	799.996	0.170213	0.00797013	0.133538
ENSG00000173267	SNCG	chr10	86958618	86963260	54.5698	66.2537	42.8858	-0.615859	0.00796232	0.133538
ENSG00000174989	FBXW8	chr12	116910956	117031148	235.348	211.061	259.635	0.297556	0.00798199	0.133538
ENSG00000144381	HSPD1	chr2	197486581	197516737	976.787	1027.46	926.114	-0.149666	0.00801082	0.133837
ENSG00000158290	CUL4B	chrX	120524609	120575794	1120.51	1176.91	1064.12	-0.145216	0.0080196	0.133837
ENSG00000197894	ADH5	chr4	99070978	99088801	380.151	410.984	349.317	-0.233928	0.00805279	0.134226
ENSG00000183853	KIRREL1	chr1	157993273	158100262	787.437	833.032	741.843	-0.167046	0.00810741	0.134971
ENSG00000115053	NCL	chr2	231453531	231483641	1669.32	1741.21	1597.44	-0.124255	0.00814035	0.135353
ENSG00000082805	ERC1	chr12	990509	1495933	1420.43	1480.99	1359.87	-0.12301	0.00816352	0.135572
ENSG00000176209	SMIM19	chr8	42541155	42555193	93.146	77.748	108.544	0.476194	0.00821068	0.136189
ENSG00000277443	MARCKS	chr6	113857362	113863471	855.564	904.316	806.811	-0.164403	0.00828696	0.137286
ENSG00000026025	VIM	chr10	17228259	17237593	1359.21	1421.22	1297.2	-0.131628	0.00831889	0.137647
ENSG00000112200	ZNF451	chr6	57086844	57170307	1206.28	1151.31	1261.25	0.131458	0.00833573	0.137758
ENSG00000196152	ZNF79	chr9	127424374	127445372	150.121	130.678	169.565	0.373309	0.00838195	0.138353
ENSG00000112118	MCM3	chr6	52264009	52284881	1082.97	1031.02	1134.92	0.138398	0.00841021	0.138651
ENSG00000101347	SAMHD1	chr20	36889773	36951901	1103.61	1159.43	1047.78	-0.145947	0.00848842	0.13977
ENSG00000085433	WDR47	chr1	108970214	109042113	500.343	464.959	535.726	0.203983	0.0086056	0.141339
ENSG00000099194	SCD	chr10	100347124	100364834	1030.54	1083.91	977.18	-0.1494	0.00859897	0.141339
ENSG00000197782	ZNF780A	chr19	40069152	40090938	142.332	123.496	161.167	0.381377	0.00861494	0.141339
ENSG00000149485	FADS1	chr11	61799625	61829318	700.79	743.603	657.977	-0.176243	0.00863143	0.141439
ENSG00000153395	LPCAT1	chr5	1456480	1523977	536.685	572.937	500.434	-0.194834	0.00867587	0.141995
ENSG00000184575	XPOT	chr12	64404350	64451127	1375.15	1434.92	1315.37	-0.125412	0.00869652	0.142162
ENSG00000124575	HIST1H1D	chr6	26234268	26234933	234.602	259.534	209.67	-0.306484	0.00873309	0.142293
ENSG00000182993	C12orf60	chr12	14803572	14906586	31.9219	23.1607	40.6832	0.786806	0.00873598	0.142293
ENSG00000196678	ERI2	chr16	20780193	20900349	267.918	241.306	294.529	0.286471	0.00872208	0.142293
ENSG00000173064	HECTD4	chr12	112160188	112382439	813.855	767.984	859.726	0.1626	0.00877108	0.142693
ENSG00000111196	MAGOHB	chr12	10604190	10613623	293.276	266.616	319.935	0.262114	0.00880669	0.14309
ENSG00000112276	BVES	chr6	105096822	105137174	200.951	178.145	223.757	0.327235	0.00881719	0.14309
ENSG00000135677	GNS	chr12	64713445	64759447	1060.74	1112.25	1009.23	-0.140093	0.00882789	0.14309
ENSG00000206560	ANKRD28	chr3	15667236	15859771	1191.85	1248.16	1135.54	-0.136315	0.00883764	0.14309
ENSG00000128595	CALU	chr7	128739292	128771807	1217.93	1276.03	1159.84	-0.137627	0.00888204	0.143637
ENSG00000170315	UBB	chr17	16380798	16382745	327.644	356.105	299.184	-0.250503	0.00889861	0.143734
ENSG00000138109	CYP2C9	chr10	94938658	94989391	7.73162	3.42338	12.0399	1.5597	0.00894193	0.144262
ENSG00000085063	CD59	chr11	33703010	33736491	1662.05	1728.99	1595.11	-0.116205	0.00897145	0.144566
ENSG00000176771	NCKAP5	chr2	132671799	133568463	122.545	142.631	102.459	-0.473314	0.00899915	0.14484
ENSG00000067057	PFKP	chr10	3066333	3137712	733.11	776.501	689.719	-0.170746	0.00908372	0.145913
ENSG00000112659	CUL9	chr6	43182175	43224587	321.14	292.77	349.51	0.254771	0.00908727	0.145913
ENSG00000164675	IQUB	chr7	123452400	123535077	18.3488	11.6788	25.0189	1.03714	0.00910951	0.145924
ENSG00000188993	LRRC66	chr4	51993702	52017620	10.9987	5.87655	16.1209	1.316	0.00910198	0.145924
ENSG00000152219	ARL14EP	chr11	30323051	30338227	203.389	180.185	226.593	0.328991	0.00916117	0.146579
ENSG00000110427	KIAA1549L	chr11	33376466	33674102	882.31	929.478	835.141	-0.154227	0.00919191	0.146897
ENSG00000260804	LINC01963	chr2	216217045	216220192	96.8934	81.5647	112.222	0.455558	0.00926123	0.147831
ENSG00000100445	SDR39U1	chr14	24439766	24442905	83.9054	69.3852	98.4257	0.498348	0.00928918	0.148103
ENSG00000215301	DDX3X	chrX	41333284	41364472	1504.51	1566.4	1442.63	-0.118675	0.00934211	0.148772
ENSG00000267106	ZNF561-AS1	chr19	9621291	9645896	26.242	18.1623	34.3217	0.882287	0.00935336	0.148777
ENSG00000089234	BRAP	chr12	111642146	111685986	522.206	486.57	557.841	0.196827	0.00943816	0.149599
ENSG00000108100	CCNY	chr10	35247025	35572669	505.624	540.923	470.325	-0.201367	0.00942134	0.149599
ENSG00000112655	PTK7	chr6	43076268	43161719	505.563	541.952	469.173	-0.207634	0.00943471	0.149599
ENSG00000197102	DYNC1H1	chr14	101964510	102056443	5158.45	5280.13	5036.76	-0.068063	0.0094512	0.149631
ENSG00000181350	LRRC75A	chr17	16441577	16492153	23.3613	15.514	31.2086	0.963754	0.00946882	0.149735
ENSG00000005801	ZNF195	chr11	3339261	3379222	388.237	357.604	418.87	0.227551	0.00951395	0.150274
ENSG00000028137	TNFRSF1B	chr1	12167003	12209228	99.7143	115.195	84.2332	-0.447067	0.00962791	0.150324
ENSG00000078177	N4BP2	chr4	40056826	40158252	523.47	487.236	559.704	0.199661	0.00959885	0.150324
ENSG00000112414	ADGRG6	chr6	142301854	142446266	769.859	813.438	726.28	-0.163294	0.00958482	0.150324
ENSG00000125844	RRBP1	chr20	17613678	17682295	728.733	771.522	685.943	-0.169386	0.00961522	0.150324
ENSG00000136051	WASHC4	chr12	105107324	105169134	1378.06	1320.03	1436.09	0.12149	0.0095454	0.150324
ENSG00000145623	OSMR	chr5	38845858	38945596	372.229	402.323	342.136	-0.233155	0.00962491	0.150324
ENSG00000163814	CDCP1	chr3	45082278	45146422	344.506	375.555	313.457	-0.259997	0.00960658	0.150324
ENSG00000166037	CEP57	chr11	95789965	95832693	680.22	638.785	721.654	0.175719	0.00956424	0.150324
ENSG00000185010	F8	chrX	154835788	155026940	21.4073	14.27	28.5446	0.952198	0.00954043	0.150324
ENSG00000185453	ZSWIM9	chr19	48170692	48197620	172.639	151.51	193.768	0.352855	0.00962635	0.150324
ENSG00000163818	LZTFL1	chr3	45823316	45916042	269.303	243.441	295.165	0.276915	0.00965832	0.150625
ENSG00000166750	SLFN5	chr17	35243036	35273655	608.67	570.018	647.322	0.183175	0.00969135	0.150967
ENSG00000138434	ITPRID2	chr2	181891833	181930738	1156.95	1210.39	1103.51	-0.133255	0.00970836	0.151059
ENSG00000099910	KLHL22	chr22	20441519	20495883	108.538	92.0335	125.042	0.438087	0.00974929	0.151175
ENSG00000107819	SFXN3	chr10	101031234	101041244	303.569	330.678	276.459	-0.257509	0.00974812	0.151175
ENSG00000122435	TRMT13	chr1	100133150	100150497	376.352	346.233	406.471	0.230793	0.00974468	0.151175
ENSG00000171603	CLSTN1	chr1	9729026	9824526	1049.8	1102.14	997.468	-0.143826	0.00976428	0.151235
ENSG00000013588	GPRC5A	chr12	12890782	12917937	131.67	149.435	113.904	-0.388702	0.00982468	0.151479
ENSG00000106366	SERPINE1	chr7	101127089	101139266	2417.9	2503.09	2332.7	-0.101667	0.00982071	0.151479
ENSG00000138381	ASNSD1	chr2	189661385	189670831	411.269	379.914	442.624	0.21987	0.00981288	0.151479
ENSG00000164659	KIAA1324L	chr7	86876906	87059699	249.253	273.667	224.84	-0.282384	0.00981718	0.151479
ENSG00000142156	COL6A1	chr21	45981737	46005050	96.4673	111.682	81.2527	-0.454119	0.00983803	0.151512
ENSG00000152778	IFIT5	chr10	89414586	89421001	657.614	615.441	699.787	0.185013	0.00987054	0.151542
ENSG00000156976	EIF4A2	chr3	186783205	186789900	1055.56	1107.77	1003.35	-0.142698	0.00986913	0.151542
ENSG00000198561	CTNND1	chr11	57753243	57819546	1240.12	1296.44	1183.79	-0.131042	0.00987349	0.151542
ENSG00000147679	UTP23	chr8	116766503	116849463	325.759	297.858	353.661	0.24698	0.00988516	0.15155
ENSG00000213859	KCTD11	chr17	7351889	7354944	87.1366	72.3356	101.938	0.489184	0.00990844	0.151736
ENSG00000078369	GNB1	chr1	1785285	1891117	1313.49	1371.29	1255.68	-0.126964	0.00995607	0.151988
ENSG00000111640	GAPDH	chr12	6533927	6538374	1006.92	1058.89	954.946	-0.148913	0.00996804	0.151988
ENSG00000173889	PHC3	chr3	170086732	170181749	1224.57	1169.08	1280.06	0.130723	0.00996972	0.151988
ENSG00000196220	SRGAP3	chr3	8980591	9363053	17.9076	11.3147	24.5005	1.05015	0.00995214	0.151988
ENSG00000135919	SERPINE2	chr2	223975112	224039319	572.936	609.648	536.223	-0.184818	0.0100172	0.15254
ENSG00000149554	CHEK1	chr11	125625136	125676255	680.868	639.403	722.334	0.175682	0.0100294	0.152554
ENSG00000183878	UTY	chrY	13248379	13480673	190.741	168.671	212.811	0.333594	0.0100782	0.153126
ENSG00000164050	PLXNB1	chr3	48403854	48430051	93.0509	78.0325	108.069	0.464725	0.0101004	0.15329
ENSG00000198176	TFDP1	chr13	113584721	113641470	663.61	703.458	623.762	-0.173208	0.0101519	0.1539
ENSG00000013364	MVP	chr16	29820394	29848039	327.235	355.614	298.856	-0.250097	0.0102281	0.154742
ENSG00000180884	ZNF792	chr19	34956354	34964049	51.2174	62.0955	40.3392	-0.610026	0.0102302	0.154742
ENSG00000156030	ELMSAN1	chr14	73715122	73790285	577.588	616.22	538.956	-0.192945	0.0102613	0.155039
ENSG00000120705	ETF1	chr5	138506095	138543300	951.884	1001.07	902.697	-0.149076	0.0102943	0.155364
ENSG00000172380	GNG12	chr1	67701466	67833467	1053.07	1103.11	1003.03	-0.137078	0.0103279	0.155698
ENSG00000173269	MMRN2	chr10	86935540	86969481	278.772	305.654	251.89	-0.278103	0.0103749	0.156234
ENSG00000116132	PRRX1	chr1	170662728	170739419	120.505	137.26	103.749	-0.400442	0.0104117	0.156615
ENSG00000105948	TTC26	chr7	139133744	139191986	283.161	257.519	308.803	0.261081	0.0104276	0.15668
ENSG00000124596	OARD1	chr6	41033627	41097787	133.248	115.588	150.908	0.381783	0.0104797	0.156942
ENSG00000128591	FLNC	chr7	128830377	128859274	2271.47	2349.78	2193.16	-0.0994708	0.0104647	0.156942
ENSG00000234028	AC062029.1	chr2	88627539	88631821	22.8696	15.5353	30.2038	0.916175	0.0104758	0.156942
ENSG00000123104	ITPR2	chr12	26336515	26833198	935.753	983.669	887.837	-0.147719	0.010582	0.158142
ENSG00000176014	TUBB6	chr18	12307669	12344320	1052.58	1104.96	1000.2	-0.143565	0.0105832	0.158142
ENSG00000167513	CDT1	chr16	88803213	88809258	435.965	403.306	468.624	0.216057	0.0106063	0.158313
ENSG00000155506	LARP1	chr5	154712902	154817607	1800.88	1868.72	1733.05	-0.108676	0.0106752	0.159166
ENSG00000159086	PAXBP1	chr21	32733899	32771858	662.316	623.276	701.357	0.170022	0.0107161	0.159327
ENSG00000166913	YWHAB	chr20	44885676	44908532	1279.7	1334.76	1224.64	-0.124126	0.0107174	0.159327
ENSG00000240694	PNMA2	chr8	26504686	26514092	126.474	145.587	107.362	-0.435904	0.0107212	0.159327
ENSG00000165476	REEP3	chr10	63521363	63625123	741.131	785.736	696.525	-0.173636	0.0107456	0.159406
ENSG00000236287	ZBED5	chr11	10812074	10858796	284.236	258.17	310.303	0.264421	0.01075	0.159406
ENSG00000137770	CTDSPL2	chr15	44427234	44529038	940.132	892.346	987.918	0.146633	0.0108059	0.160059
ENSG00000227354	RBM26-AS1	chr13	79406309	79424328	85.6836	70.3731	100.994	0.515031	0.0108426	0.160428
ENSG00000100364	KIAA0930	chr22	45190338	45240769	246.812	270.606	223.018	-0.277898	0.0108773	0.160591
ENSG00000154553	PDLIM3	chr4	185500660	185535612	149.52	130.39	168.651	0.368719	0.0108891	0.160591
ENSG00000162869	PPP1R21	chr2	48440598	48515391	323.091	295.604	350.577	0.245306	0.0108744	0.160591
ENSG00000135899	SP110	chr2	230167293	230225729	411.17	380.007	442.332	0.218567	0.0109498	0.16131
ENSG00000182752	PAPPA	chr9	116153804	116402322	306.389	332.872	279.906	-0.249207	0.0109818	0.161606
ENSG00000073111	MCM2	chr3	127598223	127622436	810.634	766.001	855.267	0.158833	0.0109949	0.161623
ENSG00000139428	MMAB	chr12	109553737	109573874	98.4951	83.4834	113.507	0.438692	0.0110327	0.161829
ENSG00000251562	MALAT1	chr11	65497688	65506516	3469.8	3570.79	3368.81	-0.0839811	0.0110246	0.161829
ENSG00000122378	PRXL2A	chr10	80407829	80437115	191.295	213.685	168.905	-0.33749	0.0110802	0.162349
ENSG00000100908	EMC9	chr14	24138959	24141588	54.5375	43.0878	65.9872	0.603508	0.0112376	0.164478
ENSG00000001036	FUCA2	chr6	143494811	143511690	295.249	321.881	268.617	-0.26009	0.011308	0.165151
ENSG00000170689	HOXB9	chr17	48621159	48626356	16.1061	10.0719	22.1402	1.0635	0.0113304	0.165151
ENSG00000170759	KIF5B	chr10	32009010	32056431	2054.96	2126.5	1983.43	-0.100439	0.0113363	0.165151
ENSG00000181666	HKR1	chr19	37312837	37369365	231.156	207.451	254.862	0.295654	0.0113444	0.165151
ENSG00000196338	NLGN3	chrX	71144831	71171201	7.56662	3.39153	11.7417	1.53676	0.0113337	0.165151
ENSG00000228544	CCDC183-AS1	chr9	136803927	136808848	18.1939	11.3134	25.0745	1.08241	0.0113612	0.165218
ENSG00000197930	ERO1A	chr14	52639916	52695900	940.286	988.213	892.36	-0.14704	0.0113921	0.16549
ENSG00000011523	CEP68	chr2	65056366	65087004	250.023	225.922	274.125	0.277892	0.0115053	0.16585
ENSG00000054654	SYNE2	chr14	63852983	64226433	1770.91	1700.01	1841.82	0.115523	0.0114791	0.16585
ENSG00000111981	ULBP1	chr6	149964007	149973710	97.9181	82.6969	113.139	0.447551	0.0115146	0.16585
ENSG00000131018	SYNE1	chr6	152121684	152637801	1284.69	1340.2	1229.18	-0.124647	0.0114319	0.16585
ENSG00000135679	MDM2	chr12	68808176	68850686	1444	1377.4	1510.61	0.133094	0.0114537	0.16585
ENSG00000168092	PAFAH1B2	chr11	117144267	117176894	818.459	863.271	773.647	-0.157944	0.011488	0.16585
ENSG00000197635	DPP4	chr2	161992241	162074542	326.619	355.88	297.357	-0.258399	0.0115001	0.16585
ENSG00000203965	EFCAB7	chr1	63523372	63572693	171.779	151.636	191.921	0.337918	0.0114785	0.16585
ENSG00000163521	GLB1L	chr2	219236606	219245478	18.6062	11.5434	25.6689	1.08823	0.0115686	0.166346
ENSG00000186448	ZNF197	chr3	44584888	44648471	221.33	198.507	244.152	0.297235	0.0115736	0.166346
ENSG00000113645	WWC1	chr5	168291651	168472303	133.515	151.322	115.708	-0.384225	0.011607	0.16665
ENSG00000115137	DNAJC27	chr2	24943636	24972094	169.554	149.521	189.588	0.340491	0.0116211	0.166676
ENSG00000101911	PRPS2	chrX	12791355	12824222	266.114	291.025	241.203	-0.269876	0.0116952	0.167561
ENSG00000117139	KDM5B	chr1	202724495	202809470	617.019	579.145	654.894	0.177048	0.0117718	0.168429
ENSG00000238266	LINC00707	chr10	6779549	6879450	87.0251	101.862	72.1881	-0.49103	0.0117806	0.168429
ENSG00000176597	B3GNT5	chr3	183253244	183298504	694.415	734.606	654.224	-0.166944	0.0118405	0.169108
ENSG00000149809	TM7SF2	chr11	65111845	65116384	41.5567	31.8479	51.2655	0.670058	0.0118939	0.169514
ENSG00000198342	ZNF442	chr19	12345949	12365905	75.1985	62.1915	88.2054	0.497399	0.0118895	0.169514
ENSG00000167658	EEF2	chr19	3976056	3985469	2199.09	2277.88	2120.3	-0.103376	0.0119082	0.169539
ENSG00000130402	ACTN4	chr19	38647649	38731583	1297.36	1355.39	1239.33	-0.129047	0.0119319	0.169698
ENSG00000067646	ZFY	chrY	2935281	2982506	405.803	372.628	438.977	0.235826	0.0121198	0.170071
ENSG00000101474	APMAP	chr20	24962925	24992979	311.53	338.109	284.951	-0.245984	0.0120008	0.170071
ENSG00000129657	SEC14L1	chr17	77088749	77217101	914.907	960.651	869.162	-0.14423	0.0120707	0.170071
ENSG00000130396	AFDN	chr6	167826922	167972023	1469.91	1530.47	1409.34	-0.118872	0.0120693	0.170071
ENSG00000132141	CCT6B	chr17	34927859	34981078	24.9414	17.2483	32.6346	0.882182	0.0121104	0.170071
ENSG00000134294	SLC38A2	chr12	46358189	46372867	1572.2	1632.64	1511.76	-0.110904	0.012124	0.170071
ENSG00000144959	NCEH1	chr3	172630249	172711218	630.773	670.408	591.137	-0.181259	0.0120087	0.170071
ENSG00000146592	CREB5	chr7	28299321	28825894	99.5783	84.4139	114.743	0.438379	0.0120423	0.170071
ENSG00000164849	GPR146	chr7	1044576	1059261	8.40049	4.12903	12.672	1.41446	0.0121336	0.170071
ENSG00000165046	LETM2	chr8	38386207	38409527	139.467	120.684	158.251	0.388169	0.012124	0.170071
ENSG00000176273	SLC35G1	chr10	93893973	93956062	99.26	84.2825	114.238	0.434291	0.0120791	0.170071
ENSG00000186056	MATN1-AS1	chr1	30718504	30726827	9.43431	4.86652	14.0021	1.35459	0.0119893	0.170071
ENSG00000186566	GPATCH8	chr17	44395284	44503430	937.513	891.099	983.928	0.142815	0.0120723	0.170071
ENSG00000226200	SGMS1-AS1	chr10	50624951	50641451	36.4782	27.3945	45.5618	0.713533	0.0120525	0.170071
ENSG00000187109	NAP1L1	chr12	76036587	76085033	1652.67	1715.03	1590.31	-0.108862	0.01215	0.170124
ENSG00000090020	SLC9A1	chr1	27098815	27166981	347.494	318.626	376.362	0.239565	0.0122134	0.170826
ENSG00000172037	LAMB2	chr3	49121114	49133118	534.091	569.233	498.949	-0.18977	0.0122378	0.170826
ENSG00000183763	TRAIP	chr3	49828599	49856574	212.618	189.431	235.804	0.314424	0.0122267	0.170826
ENSG00000276550	HERC2P2	chr15	22495570	22590815	66.2647	53.9627	78.5667	0.533713	0.0123177	0.171765
ENSG00000168883	USP39	chr2	85602856	85649282	530.444	495.416	565.473	0.190457	0.0123542	0.172072
ENSG00000180938	ZNF572	chr8	124973298	124979389	49.0973	38.4287	59.7658	0.624013	0.0123651	0.172072
ENSG00000113368	LMNB1	chr5	126776623	126837020	1085.58	1138.39	1032.77	-0.140347	0.0124075	0.172484
ENSG00000187626	ZKSCAN4	chr6	28244623	28252224	54.7312	43.6275	65.8348	0.582666	0.0125078	0.173702
ENSG00000059769	DNAJC25	chr9	111631352	111654351	185.077	164.707	205.447	0.317142	0.0125225	0.173727
ENSG00000130164	LDLR	chr19	11089362	11133816	678.022	716.944	639.099	-0.165576	0.0125796	0.174341
ENSG00000013573	DDX11	chr12	31073845	31104791	283.454	258.008	308.899	0.258804	0.0127232	0.176141
ENSG00000067182	TNFRSF1A	chr12	6328757	6342114	288.415	313.989	262.84	-0.255637	0.0127354	0.176141
ENSG00000039650	PNKP	chr19	49859882	49878351	117.904	101.642	134.166	0.397111	0.0128057	0.176796
ENSG00000159259	CHAF1B	chr21	36385378	36419015	296.442	270.608	322.276	0.251237	0.0128089	0.176796
ENSG00000159593	NAE1	chr16	66802875	66873256	543.838	578.736	508.939	-0.185073	0.0128708	0.177291
ENSG00000218336	TENM3	chr4	182143987	182803024	248.017	272.889	223.145	-0.289156	0.0128609	0.177291
ENSG00000198663	C6orf89	chr6	36871870	36928964	574.369	538.228	610.511	0.181483	0.0129127	0.177687
ENSG00000114982	KANSL3	chr2	96593170	96642787	533.182	498.772	567.592	0.186125	0.0129556	0.178097
ENSG00000024422	EHD2	chr19	47713343	47743134	636.765	675.563	597.966	-0.175749	0.0129835	0.1783
ENSG00000114933	INO80D	chr2	205993721	206086303	961.101	912.135	1010.07	0.146977	0.0130692	0.17911
ENSG00000122779	TRIM24	chr7	138460334	138589993	431.67	400.714	462.627	0.206796	0.0130819	0.17911
ENSG00000144821	MYH15	chr3	108380369	108529322	26.1756	18.6954	33.6557	0.815233	0.013085	0.17911
ENSG00000150867	PIP4K2A	chr10	22534849	22714555	507.005	540.462	473.548	-0.190309	0.0130953	0.17911
ENSG00000070756	PABPC1	chr8	100685816	100722809	1474.24	1536.69	1411.8	-0.1222	0.0131315	0.179244
ENSG00000276291	FRG1HP	chr9	40992249	41218410	193.983	172.752	215.215	0.315439	0.0131237	0.179244
ENSG00000107201	DDX58	chr9	32455705	32526324	762.674	720.164	805.184	0.160782	0.0132628	0.180854
ENSG00000185596	WASH3P	chr15	101961603	101976543	23.1463	15.8834	30.4092	0.895576	0.0133502	0.181862
ENSG00000144824	PHLDB2	chr3	111732497	111976517	883.854	929.216	838.491	-0.14805	0.0134305	0.182773
ENSG00000242802	AP5Z1	chr7	4775615	4794395	231.232	208.365	254.099	0.285034	0.0134461	0.182802
ENSG00000097046	CDC7	chr1	91500893	91525764	415.266	384.806	445.725	0.211511	0.0134598	0.182805
ENSG00000166821	PEX11A	chr15	89677764	89690783	82.0544	68.2371	95.8717	0.48453	0.0135312	0.183591
ENSG00000120616	EPC1	chr10	32267751	32378798	542.996	507.61	578.382	0.187954	0.0135598	0.183795
ENSG00000214776	AC092821.1	chr12	9480608	9576275	16.4623	10.4374	22.4872	1.03812	0.0135772	0.183848
ENSG00000103051	COG4	chr16	70480568	70523565	399.88	370.198	429.562	0.214033	0.013679	0.184588
ENSG00000159128	IFNGR2	chr21	33402896	33479348	256.161	279.833	232.49	-0.266353	0.0136802	0.184588
ENSG00000163684	RPP14	chr3	58306247	58324695	322.946	295.241	350.652	0.247378	0.0136848	0.184588
ENSG00000175745	NR2F1	chr5	93583224	93594615	436.777	468.122	405.433	-0.206943	0.0136863	0.184588
ENSG00000173905	GOLIM4	chr3	168008677	168095975	671.681	709.635	633.726	-0.162974	0.0137465	0.185217
ENSG00000151640	DPYSL4	chr10	132186900	132205776	29.3484	20.9389	37.7579	0.821	0.0138052	0.185823
ENSG00000114416	FXR1	chr3	180868141	180982753	1006.84	1055.74	957.943	-0.140104	0.0138684	0.186119
ENSG00000127586	CHTF18	chr16	788046	800737	254.959	231.112	278.807	0.269609	0.0138513	0.186119
ENSG00000167491	GATAD2A	chr19	19385826	19508931	937.162	982.637	891.686	-0.139974	0.0138649	0.186119
ENSG00000111726	CMAS	chr12	22046174	22065674	219.768	241.438	198.098	-0.284136	0.0139125	0.186512
ENSG00000173193	PARP14	chr3	122680618	122730840	1887.38	1816.34	1958.42	0.1086	0.0139251	0.186512
ENSG00000100243	CYB5R3	chr22	42617840	42649568	366.542	394.528	338.556	-0.22013	0.0139835	0.186875
ENSG00000113140	SPARC	chr5	151661096	151687165	1396.01	1454.94	1337.09	-0.121783	0.0140212	0.186875
ENSG00000129167	TPH1	chr11	18017564	18042426	27.5621	19.4931	35.631	0.837925	0.0140311	0.186875
ENSG00000134775	FHOD3	chr18	36297714	36780055	238.898	261.378	216.418	-0.271176	0.0140061	0.186875
ENSG00000143870	PDIA6	chr2	10783391	10837977	829.039	871.991	786.087	-0.149444	0.0140349	0.186875
ENSG00000204149	AGAP6	chr10	49982190	50010499	86.8944	73.1408	100.648	0.455244	0.0139711	0.186875
ENSG00000017797	RALBP1	chr18	9475009	9538116	807.722	849.76	765.684	-0.150119	0.0141306	0.187778
ENSG00000050165	DKK3	chr11	11963106	12009769	622.032	659.186	584.877	-0.172274	0.0141581	0.187778
ENSG00000134308	YWHAQ	chr2	9583972	9631014	762.892	804.151	721.632	-0.156	0.0141352	0.187778
ENSG00000177854	TMEM187	chrX	153972327	153983195	26.9839	19.1962	34.7716	0.824729	0.0141576	0.187778
ENSG00000197016	ZNF470	chr19	56567511	56588911	162.03	143.42	180.64	0.330819	0.0141784	0.187864
ENSG00000140471	LINS1	chr15	100559369	100603230	200.883	179.997	221.768	0.299576	0.014251	0.188641
ENSG00000137076	TLN1	chr9	35696948	35732395	2119.42	2197.36	2041.47	-0.106107	0.0142873	0.188779
ENSG00000198315	ZKSCAN8	chr6	28141910	28159472	449.186	416.763	481.61	0.208175	0.0142892	0.188779
ENSG00000167004	PDIA3	chr15	43746392	43773279	811.66	853.948	769.373	-0.150279	0.0143939	0.189792
ENSG00000204852	TCTN1	chr12	110614027	110649430	116.815	100.691	132.939	0.397379	0.0143802	0.189792
ENSG00000120539	MASTL	chr10	27154824	27186924	593.462	556.605	630.319	0.179126	0.0144386	0.190197
ENSG00000108821	COL1A1	chr17	50183289	50201632	212.148	233.609	190.687	-0.291503	0.0144611	0.190309
ENSG00000112149	CD83	chr6	14117256	14136918	15.8214	10.1038	21.5391	1.02138	0.0144886	0.190486
ENSG00000157227	MMP14	chr14	22836557	22849027	757.34	799.173	715.507	-0.159331	0.0145277	0.190631
ENSG00000188690	UROS	chr10	125784980	125823285	238.214	215.82	260.609	0.270917	0.014527	0.190631
ENSG00000055070	SZRD1	chr1	16352575	16398145	567.663	603.555	531.77	-0.18236	0.0145598	0.190867
ENSG00000105355	PLIN3	chr19	4838341	4867768	310.239	336.489	283.989	-0.243933	0.0146121	0.191368
ENSG00000186364	NUDT17	chr1	145845629	145848953	44.5471	34.7487	54.3454	0.630571	0.0146644	0.191867
ENSG00000077935	SMC1B	chr22	45344063	45413619	22.8566	15.7118	30.0015	0.891472	0.0146996	0.192143
ENSG00000177076	ACER2	chr9	19409059	19452020	38.8788	29.6778	48.0797	0.677929	0.0147842	0.193063
ENSG00000078304	PPP2R5C	chr14	101761798	101927989	682.049	721.04	643.058	-0.164888	0.0148019	0.193108
ENSG00000059804	SLC2A3	chr12	7919230	7936275	242.797	266.076	219.518	-0.276352	0.0148307	0.193298
ENSG00000255135	AP002360.1	chr11	76441338	76444656	27.032	19.4382	34.6258	0.801655	0.0148632	0.193535
ENSG00000141522	ARHGDIA	chr17	81867721	81871406	628.139	665.139	591.14	-0.169884	0.0148965	0.193784
ENSG00000138760	SCARB2	chr4	76158733	76234536	1085.1	1135.65	1034.55	-0.134386	0.0149763	0.194635
ENSG00000116016	EPAS1	chr2	46293667	46386703	1024.29	1072.17	976.407	-0.134854	0.0150181	0.19499
ENSG00000159176	CSRP1	chr1	201483530	201509456	649.238	686.547	611.928	-0.16574	0.0150537	0.195056
ENSG00000183741	CBX6	chr22	38861450	38872314	565.528	600.622	530.434	-0.178966	0.0150662	0.195056
ENSG00000213918	DNASE1	chr16	3611728	3680143	168.743	148.844	188.643	0.339823	0.0150478	0.195056
ENSG00000174804	FZD4	chr11	86945679	86955391	607.014	646.622	567.406	-0.18823	0.0151342	0.19575
ENSG00000254122	PCDHGB7	chr5	141417645	141512979	15.8428	21.5193	10.1663	-1.01201	0.0152437	0.196978
ENSG00000132824	SERINC3	chr20	44496221	44522109	936.253	981.252	891.254	-0.138638	0.0152792	0.197249
ENSG00000141294	LRRC46	chr17	47831627	47837713	28.5341	20.811	36.2571	0.772459	0.0154582	0.199369
ENSG00000174405	LIG4	chr13	108207439	108218368	528.411	495.033	561.789	0.182158	0.0154828	0.199497
ENSG00000011243	AKAP8L	chr19	15380048	15419141	358.406	330.305	386.508	0.226067	0.0156309	0.200279
ENSG00000145284	SCD5	chr4	82629539	82798857	276.676	300.907	252.445	-0.252436	0.0155683	0.200279
ENSG00000172534	HCFC1	chrX	153947553	153971807	1161.16	1210.66	1111.67	-0.122964	0.0156166	0.200279
ENSG00000177888	ZBTB41	chr1	197153680	197200542	608.6	569.877	647.322	0.183532	0.0156082	0.200279
ENSG00000196628	TCF4	chr18	55222331	55664787	1116.4	1166.66	1066.14	-0.129865	0.015632	0.200279
ENSG00000247556	OIP5-AS1	chr15	41283990	41309737	829.486	787.709	871.262	0.145269	0.0156308	0.200279
ENSG00000128881	TTBK2	chr15	42738734	42920809	494.275	461.806	526.744	0.189432	0.0156878	0.200804
ENSG00000211455	STK38L	chr12	27243968	27325959	296.93	272.141	321.719	0.240631	0.0157361	0.201232
ENSG00000130717	UCK1	chr9	131523801	131531268	162.729	144.189	181.27	0.328142	0.0157759	0.201551
ENSG00000067365	METTL22	chr16	8621683	8649654	131.586	114.475	148.698	0.374472	0.0159068	0.202304
ENSG00000105472	CLEC11A	chr19	50723329	50725718	52.6668	62.9662	42.3674	-0.560698	0.0158895	0.202304
ENSG00000108306	FBXL20	chr17	39252644	39402523	328.519	301.569	355.47	0.236516	0.0159093	0.202304
ENSG00000136152	COG3	chr13	45464898	45536630	422.778	392.794	452.761	0.204491	0.0158941	0.202304
ENSG00000198440	ZNF583	chr19	56397966	56436035	101.706	86.7945	116.618	0.421901	0.015894	0.202304
ENSG00000120279	MYCT1	chr6	152697895	152724567	435.23	466.092	404.367	-0.204478	0.0160198	0.203449
ENSG00000140992	PDPK1	chr16	2537964	2603188	385.853	356.213	415.493	0.221507	0.0160294	0.203449
ENSG00000141219	C17orf80	chr17	73232233	73248947	394.098	364.933	423.264	0.213382	0.0161005	0.20416
ENSG00000107560	RAB11FIP2	chr10	118004916	118046603	431.859	401.938	461.779	0.199766	0.0161391	0.204459
ENSG00000138768	USO1	chr4	75724593	75814286	866.717	909.086	824.348	-0.141	0.0161616	0.204553
ENSG00000165490	DDIAS	chr11	82899975	82958277	294.22	268.881	319.559	0.248269	0.0163391	0.206607
ENSG00000107862	GBF1	chr10	102245532	102382899	1018.99	973.288	1064.68	0.129357	0.0164092	0.207006
ENSG00000128487	SPECC1	chr17	20009344	20319026	17.6611	11.4859	23.8364	0.992159	0.0164187	0.207006
ENSG00000166226	CCT2	chr12	69585334	69601570	684.224	723.085	645.363	-0.163813	0.0164317	0.207006
ENSG00000166912	MTMR10	chr15	30938941	30991607	576.665	541.526	611.803	0.175731	0.0163952	0.207006
ENSG00000119699	TGFB3	chr14	75958099	75982991	36.572	27.3937	45.7504	0.719407	0.016554	0.208354
ENSG00000036257	CUL3	chr2	224470150	224585397	696.004	735.277	656.73	-0.162753	0.0166279	0.208541
ENSG00000104936	DMPK	chr19	45769717	45782552	126.393	110.063	142.724	0.371928	0.0165945	0.208541
ENSG00000122482	ZNF644	chr1	90915298	91022272	1285.43	1233.22	1337.65	0.117174	0.0166747	0.208541
ENSG00000123384	LRP1	chr12	57128493	57213351	401.761	432.205	371.317	-0.218517	0.0166074	0.208541
ENSG00000163661	PTX3	chr3	157436789	157443628	825.154	869.413	780.895	-0.154726	0.0166734	0.208541
ENSG00000180370	PAK2	chr3	196739857	196832647	1088.92	1138.03	1039.82	-0.130089	0.0166765	0.208541
ENSG00000197256	KANK2	chr19	11164267	11197791	585.686	621.316	550.055	-0.175451	0.0166627	0.208541
ENSG00000169018	FEM1B	chr15	68277803	68295865	757.318	717.652	796.984	0.151066	0.0167282	0.208994
ENSG00000077514	POLD3	chr11	74493851	74669117	561.496	526.856	596.136	0.177917	0.0167726	0.209357
ENSG00000103061	SLC7A6OS	chr16	68284503	68310946	296.533	271.993	321.074	0.238528	0.0168157	0.209558
ENSG00000136026	CKAP4	chr12	106237877	106304279	504.488	537.652	471.323	-0.18958	0.0168196	0.209558
ENSG00000110721	CHKA	chr11	68052859	68121444	194.601	174.61	214.593	0.29594	0.0170128	0.211771
ENSG00000177352	CCDC71	chr3	49162535	49166321	95.8323	81.8315	109.833	0.420139	0.0170468	0.211805
ENSG00000214413	BBIP1	chr10	110898730	110919274	194.081	173.512	214.65	0.30537	0.0170433	0.211805
ENSG00000138600	SPPL2A	chr15	50702266	50765808	612.464	576.177	648.752	0.170875	0.0171013	0.211985
ENSG00000160014	CALM3	chr19	46601074	46610793	693.151	732.683	653.619	-0.164501	0.0170806	0.211985
ENSG00000186265	BTLA	chr3	112463968	112499561	8.28257	4.23121	12.3339	1.34989	0.0171238	0.211985
ENSG00000204131	NHSL2	chrX	71910818	72161750	438.891	471.045	406.736	-0.211289	0.0171102	0.211985
ENSG00000261175	LINC02188	chr16	86710122	86742083	11.6446	16.7515	6.53779	-1.23573	0.0171962	0.212687
ENSG00000085840	ORC1	chr1	52372829	52404459	428.024	398.037	458.011	0.202009	0.0172544	0.213213
ENSG00000162650	ATXN7L2	chr1	109483479	109492804	76.3301	63.7788	88.8814	0.472501	0.0173246	0.213885
ENSG00000100320	RBFOX2	chr22	35738736	36028425	1187.28	1237.47	1137.1	-0.121923	0.0173863	0.213902
ENSG00000128829	EIF2AK4	chr15	39934146	40035591	745.231	784.94	705.523	-0.153683	0.017389	0.213902
ENSG00000143549	TPM3	chr1	154155304	154194648	1029.48	1078.09	980.876	-0.136202	0.0173758	0.213902
ENSG00000160072	ATAD3B	chr1	1471769	1497848	216.614	195.3	237.928	0.283517	0.0173854	0.213902
ENSG00000126070	AGO3	chr1	35930718	36072500	673.7	635.178	712.222	0.164921	0.0174759	0.21451
ENSG00000174365	SNHG11	chr20	38446578	38450921	20.8612	14.2328	27.4895	0.90325	0.0174858	0.21451
ENSG00000198862	LTN1	chr21	28928144	28992956	1142.28	1093.02	1191.54	0.124407	0.0174848	0.21451
ENSG00000015153	YAF2	chr12	42157104	42238349	340.379	314.34	366.418	0.220516	0.0175071	0.214577
ENSG00000140521	POLG	chr15	89305198	89334861	389.588	361.229	417.947	0.209863	0.0175567	0.214603
ENSG00000162493	PDPN	chr1	13583465	13617957	553.756	587.003	520.509	-0.173133	0.0175509	0.214603
ENSG00000260912	AL158206.1	chr9	19453209	19455173	17.2448	11.3412	23.1484	0.96844	0.0175506	0.214603
ENSG00000076650	GPATCH1	chr19	33080880	33130542	368.936	341.044	396.827	0.217957	0.0176132	0.214787
ENSG00000162616	DNAJB4	chr1	77979175	78017964	697.947	735.404	660.49	-0.154778	0.0176223	0.214787
ENSG00000167380	ZNF226	chr19	44165073	44178381	152.391	134.775	170.007	0.332832	0.0176509	0.214787
ENSG00000196268	ZNF493	chr19	21397119	21427573	56.6508	46.086	67.2156	0.534805	0.0176436	0.214787
ENSG00000234585	CCT6P3	chr7	65038354	65074713	36.4457	27.4441	45.4473	0.707464	0.0176004	0.214787
ENSG00000034510	TMSB10	chr2	84905625	84906675	247.24	270.076	224.403	-0.266192	0.0177529	0.215823
ENSG00000133112	TPT1	chr13	45333471	45341370	831.408	873.438	789.379	-0.145811	0.0177692	0.215823
ENSG00000196865	NHLRC2	chr10	113854661	113917194	769.349	728.626	810.072	0.152672	0.0177838	0.215823
ENSG00000090339	ICAM1	chr19	10270835	10286615	46.2432	55.8753	36.6112	-0.59664	0.0178144	0.216002
ENSG00000102271	KLHL4	chrX	87517749	87670050	245.323	268.084	222.562	-0.267387	0.0179484	0.217432
ENSG00000129173	E2F8	chr11	19224063	19241620	332.017	305.927	358.107	0.226517	0.0179748	0.217557
ENSG00000081014	AP4E1	chr15	50908672	51005900	720.834	682.712	758.955	0.152526	0.0179993	0.217561
ENSG00000125170	DOK4	chr16	57471922	57487327	157.442	175.344	139.541	-0.327409	0.0180071	0.217561
ENSG00000089091	DZANK1	chr20	18383367	18467281	84.5712	71.0133	98.1291	0.461046	0.0180601	0.217619
ENSG00000110321	EIF4G2	chr11	10797050	10809110	2122.34	2191.26	2053.43	-0.0936814	0.0180561	0.217619
ENSG00000115827	DCAF17	chr2	171434217	171485052	533.296	500.28	566.311	0.178523	0.0180498	0.217619
ENSG00000111669	TPI1	chr12	6867119	6870948	533.063	566.592	499.534	-0.181385	0.0180914	0.217803
ENSG00000163071	SPATA18	chr4	52051331	52097292	21.9352	14.8026	29.0679	0.928062	0.0182188	0.219142
ENSG00000165121	AL353743.1	chr9	85805359	85849542	72.1759	60.0202	84.3316	0.483793	0.0182489	0.21931
ENSG00000080503	SMARCA2	chr9	1980290	2193624	987.323	1032.23	942.42	-0.131183	0.0182945	0.219469
ENSG00000188596	CFAP54	chr12	96489571	96875555	217.066	195.78	238.352	0.282551	0.0182896	0.219469
ENSG00000079335	CDC14A	chr1	100345001	100520278	153.724	136.152	171.296	0.32912	0.0183241	0.21963
ENSG00000151229	SLC2A13	chr12	39755021	40106089	117.819	102.411	133.227	0.376281	0.018372	0.22001
ENSG00000134444	RELCH	chr18	62187255	62310217	502.403	470.169	534.638	0.185012	0.018412	0.220288
ENSG00000221886	ZBED8	chr5	160393148	160400097	79.7919	67.2385	92.3453	0.45199	0.0184277	0.220288
ENSG00000111224	PARP11	chr12	3791047	3873448	129.022	112.667	145.377	0.364878	0.0184801	0.220526
ENSG00000159842	ABR	chr17	1003518	1229738	608.654	644.718	572.59	-0.170887	0.0184769	0.220526
ENSG00000178904	DPY19L3	chr19	32405543	32485895	354.188	327.438	380.938	0.217717	0.0185139	0.220736
ENSG00000084693	AGBL5	chr2	27042364	27070622	256.967	233.345	280.588	0.264953	0.0186464	0.220763
ENSG00000104866	PPP1R37	chr19	45091396	45148077	243.961	221.425	266.497	0.266209	0.0185956	0.220763
ENSG00000113615	SEC24A	chr5	134648789	134727823	648.953	613.147	684.758	0.159116	0.0186313	0.220763
ENSG00000136628	EPRS	chr1	219968601	220046658	1386.96	1442.47	1331.46	-0.115449	0.0185875	0.220763
ENSG00000141429	GALNT1	chr18	35581117	35711834	700.937	740.301	661.572	-0.161981	0.0186383	0.220763
ENSG00000157617	C2CD2	chr21	41885112	41953890	289.531	313.739	265.323	-0.240979	0.0186053	0.220763
ENSG00000160959	LRRC14	chr8	144517992	144525178	164.352	145.63	183.075	0.328114	0.018581	0.220763
ENSG00000179820	MYADM	chr19	53866223	53876437	193.38	212.992	173.768	-0.292121	0.0185413	0.220763
ENSG00000061987	MON2	chr12	62466817	62600479	656.52	618.274	694.767	0.168025	0.0187128	0.220971
ENSG00000135365	PHF21A	chr11	45929323	46121178	297.528	273.066	321.99	0.236968	0.0186807	0.220971
ENSG00000179743	FLJ37453	chr1	15834474	15848147	21.2301	14.3594	28.1007	0.921936	0.0186987	0.220971
ENSG00000165511	C10orf25	chr10	44997698	45000888	41.8146	32.1085	51.5207	0.665686	0.0187455	0.221165
ENSG00000117335	CD46	chr1	207752057	207795513	738.683	778.159	699.207	-0.154136	0.0188228	0.221307
ENSG00000130940	CASZ1	chr1	10636604	10796650	43.1662	33.6901	52.6422	0.628844	0.0188201	0.221307
ENSG00000154114	TBCEL	chr11	121024072	121090775	281.1	257.07	305.131	0.246385	0.0187969	0.221307
ENSG00000184939	ZFP90	chr16	68530090	68576072	238.942	216.646	261.238	0.268892	0.0187958	0.221307
ENSG00000104859	CLASRP	chr19	45039040	45070956	247.992	225.697	270.287	0.259056	0.0188559	0.221504
ENSG00000102738	MRPS31	chr13	40729135	40771173	206.409	186.194	226.623	0.282113	0.0188942	0.221571
ENSG00000137504	CREBZF	chr11	85659708	85682908	421.736	392.678	450.794	0.198649	0.0188834	0.221571
ENSG00000114541	FRMD4B	chr3	69169990	69542583	567.869	604.259	531.48	-0.184825	0.0189181	0.221659
ENSG00000059728	MXD1	chr2	69897688	69942945	272.68	248.999	296.361	0.250294	0.0189956	0.221904
ENSG00000104643	MTMR9	chr8	11284416	11328146	498.861	467.27	530.451	0.182597	0.0190649	0.221904
ENSG00000115107	STEAP3	chr2	119223831	119265652	248.847	271.581	226.113	-0.263271	0.019055	0.221904
ENSG00000119514	GALNT12	chr9	98807699	98850081	35.9226	44.6185	27.2267	-0.692556	0.0190861	0.221904
ENSG00000134287	ARF3	chr12	48935723	48957551	291.041	315.084	266.998	-0.238084	0.019078	0.221904
ENSG00000135482	ZC3H10	chr12	56118159	56127514	95.1157	81.3713	108.86	0.415453	0.0190304	0.221904
ENSG00000136169	SETDB2	chr13	49444374	49495003	246.403	224.193	268.613	0.259728	0.0189999	0.221904
ENSG00000152582	SPEF2	chr5	35617844	35814611	10.7428	6.1743	15.3114	1.18497	0.0190862	0.221904
ENSG00000197279	ZNF165	chr6	28080975	28089563	33.8545	25.4135	42.2955	0.712944	0.0189628	0.221904
ENSG00000171302	CANT1	chr17	78991717	79009867	441.961	472.166	411.755	-0.19706	0.0191062	0.221946
ENSG00000065060	UHRF1BP1	chr6	34792015	34883138	736.207	697.869	774.546	0.150189	0.0191551	0.222133
ENSG00000168806	LCMT2	chr15	43323649	43330605	106.25	91.6606	120.84	0.39496	0.0191455	0.222133
ENSG00000103249	CLCN7	chr16	1444934	1475580	233.093	211.509	254.676	0.266795	0.0191975	0.222435
ENSG00000135905	DOCK10	chr2	224765090	225042445	855.994	897.254	814.733	-0.139027	0.0192975	0.223213
ENSG00000284634	AC092821.3	chr12	9448295	9658392	14.1748	8.99422	19.3555	1.02625	0.0192919	0.223213
ENSG00000120875	DUSP4	chr8	29333064	29350668	600.376	665.872	534.88	-0.315499	0.0193405	0.223329
ENSG00000168309	FAM107A	chr3	58564117	58627610	9.6763	13.9284	5.42418	-1.21648	0.0193398	0.223329
ENSG00000265491	RNF115	chr1	145738868	145824077	491.685	460.302	523.067	0.18404	0.0193612	0.223379
ENSG00000114739	ACVR2B	chr3	38453851	38493142	165.69	147.678	183.703	0.313016	0.0193799	0.223404
ENSG00000107864	CPEB3	chr10	92046692	92291087	100.116	85.8283	114.403	0.410441	0.0195164	0.224596
ENSG00000164244	PRRC1	chr5	127517609	127555089	495.837	527.093	464.581	-0.181761	0.0195064	0.224596
ENSG00000089199	CHGB	chr20	5911430	5925361	11.2797	6.58086	15.9785	1.16327	0.0195985	0.225159
ENSG00000147251	DOCK11	chrX	118495898	118686163	122.951	138.751	107.15	-0.369827	0.0195925	0.225159
ENSG00000119844	AFTPH	chr2	64524305	64593005	497.365	466.084	528.646	0.181346	0.01962	0.225215
ENSG00000008394	MGST1	chr12	16347142	16609259	103.68	117.843	89.5169	-0.392797	0.019675	0.225466
ENSG00000188878	FBF1	chr17	75909574	75941140	44.2241	34.9775	53.4707	0.598387	0.0196751	0.225466
ENSG00000182095	TNRC18	chr7	5306790	5425414	934.389	977.365	891.413	-0.132661	0.0197654	0.226119
ENSG00000223573	TINCR	chr19	5558167	5578349	13.5341	8.2554	18.8128	1.09807	0.0197491	0.226119
ENSG00000132688	NES	chr1	156668763	156677397	334.402	360.894	307.909	-0.228385	0.0197911	0.226222
ENSG00000113761	ZNF346	chr5	177022696	177081189	201.592	181.862	221.322	0.281894	0.0198347	0.226339
ENSG00000160323	ADAMTS13	chr9	133414358	133459402	8.04587	4.09585	11.9959	1.35066	0.0198232	0.226339
ENSG00000150687	PRSS23	chr11	86791059	86952910	1517.5	1572.65	1462.34	-0.104848	0.0198584	0.226419
ENSG00000122359	ANXA11	chr10	80150889	80205572	337.624	363.418	311.831	-0.220213	0.0199001	0.226514
ENSG00000153187	HNRNPU	chr1	244840638	244864560	2128.58	2193.98	2063.19	-0.0886384	0.0198942	0.226514
ENSG00000115687	PASK	chr2	241106099	241150264	252.433	228.898	275.968	0.268723	0.0200063	0.226582
ENSG00000144028	SNRNP200	chr2	96274336	96305515	1999.81	2063.42	1936.2	-0.0917585	0.0199688	0.226582
ENSG00000171522	PTGER4	chr5	40679498	40693735	358.512	385.141	331.883	-0.214112	0.0199912	0.226582
ENSG00000182150	ERCC6L2	chr9	95875701	96014571	722.455	684.112	760.798	0.153068	0.0199498	0.226582
ENSG00000185917	SETD4	chr21	36034541	36079389	143.968	126.983	160.953	0.339628	0.0200042	0.226582
ENSG00000273703	HIST1H2BM	chr6	27815044	27815424	89.772	103.285	76.2586	-0.432767	0.0199273	0.226582
ENSG00000161513	FDXR	chr17	74862497	74873031	80.0843	67.243	92.9255	0.460836	0.0200257	0.226613
ENSG00000104093	DMXL2	chr15	51447711	51622833	744.41	705.875	782.945	0.149298	0.0200847	0.226902
ENSG00000214198	TTC41P	chr12	103843749	103930211	17.7997	11.6124	23.9869	0.986325	0.0200805	0.226902
ENSG00000058668	ATP2B4	chr1	203626561	203744081	864.51	906.363	822.658	-0.139636	0.0201506	0.227239
ENSG00000096717	SIRT1	chr10	67884669	67918390	569.645	536.292	602.999	0.16884	0.0202102	0.227239
ENSG00000110811	P3H3	chr12	6828410	6839851	225.913	246.671	205.154	-0.264699	0.0201339	0.227239
ENSG00000119685	TTLL5	chr14	75633625	75955078	826.143	785.686	866.599	0.14124	0.0201959	0.227239
ENSG00000185485	SDHAP1	chr3	195959748	195990318	110.005	95.0786	124.931	0.390341	0.020188	0.227239
ENSG00000255389	Z97989.1	chr6	111599875	111602295	25.7808	18.5946	32.967	0.793679	0.020215	0.227239
ENSG00000146556	WASH2P	chr2	113588550	113599043	15.4855	10.0003	20.9707	0.998044	0.0202347	0.227272
ENSG00000100439	ABHD4	chr14	22598237	22613215	74.8619	62.9702	86.7537	0.456061	0.0203451	0.227808
ENSG00000149308	NPAT	chr11	108157215	108222642	630.496	595.481	665.511	0.160151	0.0203496	0.227808
ENSG00000167384	ZNF180	chr19	44474428	44500524	188.405	169.401	207.409	0.290481	0.0203348	0.227808
ENSG00000180398	MCFD2	chr2	46901870	46941855	1246.36	1296.64	1196.07	-0.11638	0.020322	0.227808
ENSG00000174231	PRPF8	chr17	1650629	1684882	2291.98	2360.09	2223.86	-0.0857376	0.0204236	0.228448
ENSG00000153071	DAB2	chr5	39371675	39462300	664.473	700.568	628.378	-0.156657	0.0204439	0.228487
ENSG00000081189	MEF2C	chr5	88717117	88904257	469.113	502.411	435.816	-0.204711	0.0205762	0.228751
ENSG00000128596	CCDC136	chr7	128790757	128822132	84.4962	71.867	97.1254	0.42936	0.0205856	0.228751
ENSG00000138757	G3BP2	chr4	75642782	75724525	1078.27	1125.23	1031.3	-0.125646	0.0204871	0.228751
ENSG00000163602	RYBP	chr3	72371825	72446621	421.654	392.483	450.824	0.199462	0.0205379	0.228751
ENSG00000165895	ARHGAP42	chr11	100687653	100993941	49.2425	39.2278	59.2571	0.58294	0.0205143	0.228751
ENSG00000184436	THAP7	chr22	20999104	21002196	132.509	116.436	148.581	0.349055	0.0205462	0.228751
ENSG00000198682	PAPSS2	chr10	87659613	87747705	462.979	492.709	433.25	-0.185133	0.0205734	0.228751
ENSG00000177000	MTHFR	chr1	11785723	11806920	167.07	148.542	185.599	0.31939	0.0206403	0.229172
ENSG00000006607	FARP2	chr2	241356243	241494841	657.157	621.3	693.014	0.157355	0.0206581	0.229181
ENSG00000133574	GIMAP4	chr7	150567277	150573955	87.9624	101.482	74.4429	-0.441914	0.0206761	0.229194
ENSG00000105202	FBL	chr19	39834458	39846414	264.662	287.576	241.748	-0.249495	0.0207739	0.229715
ENSG00000119138	KLF9	chr9	70384597	70414624	485.85	517.106	454.595	-0.185496	0.02075	0.229715
ENSG00000135047	CTSL	chr9	87725519	87731393	394.693	423.165	366.221	-0.207976	0.0207721	0.229715
ENSG00000104419	NDRG1	chr8	133237171	133302022	459.958	489.674	430.243	-0.186264	0.0208198	0.229848
ENSG00000240498	CDKN2B-AS1	chr9	21994778	22121097	70.1679	58.2576	82.0783	0.487471	0.0208074	0.229848
ENSG00000155660	PDIA4	chr7	149003062	149028641	824.392	864.329	784.455	-0.139719	0.0208673	0.229998
ENSG00000168209	DDIT4	chr10	72273920	72276036	297.059	321.161	272.958	-0.233829	0.0208603	0.229998
ENSG00000171161	ZNF672	chr1	248838210	248849517	190.628	171.556	209.7	0.288128	0.0209217	0.230411
ENSG00000113758	DBN1	chr5	177456608	177474401	803.929	843.605	764.252	-0.142342	0.0209682	0.230735
ENSG00000110844	PRPF40B	chr12	49568218	49644666	128.813	113.072	144.553	0.351594	0.0209864	0.230748
ENSG00000149547	EI24	chr11	125569216	125584687	564.671	597.712	531.629	-0.168732	0.0210567	0.231294
ENSG00000172869	DMXL1	chr5	119037772	119249138	590.79	557.022	624.559	0.164824	0.0210701	0.231294
ENSG00000173821	RNF213	chr17	80260866	80398786	2998.42	2909.04	3087.8	0.0860075	0.0211002	0.231437
ENSG00000100297	MCM5	chr22	35400063	35425430	578.661	544.729	612.593	0.169096	0.0211324	0.231603
ENSG00000163964	PIGX	chr3	196639775	196736007	108.413	93.9434	122.882	0.383826	0.0211637	0.231759
ENSG00000139629	GALNT6	chr12	51351247	51392867	273.566	297.809	249.322	-0.255434	0.0211925	0.231886
ENSG00000142751	GPN2	chr1	26876133	26890297	218.908	198.532	239.284	0.268124	0.0212209	0.231951
ENSG00000214176	PLEKHM1P1	chr17	64779259	64837154	78.2108	65.7534	90.6681	0.457578	0.0212326	0.231951
ENSG00000143951	WDPCP	chr2	63121383	63827843	135.591	119.075	152.108	0.35062	0.0212806	0.232289
ENSG00000141542	RAB40B	chr17	82654973	82698728	33.317	41.358	25.2761	-0.688883	0.0213158	0.232326
ENSG00000149639	SOGA1	chr20	36777442	36863686	1032.16	1076.28	988.045	-0.123289	0.0213354	0.232326
ENSG00000252690	AC105339.2	chr15	82752884	82757208	31.9331	24.0632	39.8029	0.7031	0.0213335	0.232326
ENSG00000227398	KIF9-AS1	chr3	47164497	47246601	35.6571	27.4304	43.8839	0.658766	0.0213747	0.232568
ENSG00000130544	ZNF557	chr19	7069444	7087968	220.026	199.278	240.774	0.271661	0.02141	0.232765
ENSG00000100239	PPP6R2	chr22	50343304	50445090	232.199	210.834	253.564	0.265091	0.0214713	0.232942
ENSG00000104497	SNX16	chr8	81799581	81842866	204.156	182.538	225.775	0.305187	0.0214778	0.232942
ENSG00000117020	AKT3	chr1	243488233	243851079	1077.99	1123.34	1032.65	-0.121327	0.0214546	0.232942
ENSG00000087494	PTHLH	chr12	27958084	27972705	120.9	103.855	137.944	0.406105	0.0215266	0.233285
ENSG00000146376	ARHGAP18	chr6	129576132	129710225	780.42	819.376	741.464	-0.143963	0.0215673	0.23354
ENSG00000177034	MTX3	chr5	79976731	79991265	356.951	330.66	383.242	0.212311	0.0216779	0.234363
ENSG00000188229	TUBB4B	chr9	137241213	137243707	777.127	815.549	738.705	-0.14259	0.0216668	0.234363
ENSG00000121060	TRIM25	chr17	56836387	56914080	879.973	838.981	920.966	0.134356	0.021751	0.23478
ENSG00000140350	ANP32A	chr15	68778535	68820897	360.886	387.631	334.142	-0.21363	0.0217647	0.23478
ENSG00000181896	ZNF101	chr19	19668796	19683509	150.22	132.908	167.532	0.33178	0.0217684	0.23478
ENSG00000137486	ARRB1	chr11	75264182	75351705	125.916	142.026	109.807	-0.368232	0.0218177	0.235125
ENSG00000092964	DPYSL2	chr8	26514022	26658178	885.907	930.244	841.569	-0.144364	0.021917	0.236008
ENSG00000100503	NIN	chr14	50719763	50831121	1121.35	1167.75	1074.95	-0.119356	0.0219573	0.236249
ENSG00000102144	PGK1	chrX	77910739	78129296	706.965	744.795	669.136	-0.154326	0.0219742	0.236249
ENSG00000113739	STC2	chr5	173314713	173329503	301.326	325.766	276.886	-0.233764	0.0220152	0.236315
ENSG00000164867	NOS3	chr7	150990995	151014588	196.818	216.804	176.831	-0.29252	0.021998	0.236315
ENSG00000138617	PARP16	chr15	65234460	65300618	73.7454	62.0703	85.4206	0.454415	0.0221588	0.237293
ENSG00000148400	NOTCH1	chr9	136494433	136545786	634.57	670.808	598.331	-0.164696	0.0221439	0.237293
ENSG00000186501	TMEM222	chr1	27322145	27336400	101.983	88.2115	115.755	0.388182	0.0221245	0.237293
ENSG00000061676	NCKAP1	chr2	182909115	183038858	1948.73	2010.44	1887.03	-0.0913485	0.0222344	0.237915
ENSG00000253320	AZIN1-AS1	chr8	102864280	103001684	10.6622	6.1398	15.1846	1.18067	0.0222877	0.238297
ENSG00000000460	C1orf112	chr1	169662007	169854080	345.406	320.019	370.792	0.211836	0.022386	0.238884
ENSG00000135119	RNFT2	chr12	116738178	116853631	48.2913	38.7265	57.8562	0.567092	0.022413	0.238884
ENSG00000158669	GPAT4	chr8	41577187	41625001	505.565	537.016	474.114	-0.179377	0.0224083	0.238884
ENSG00000197747	S100A10	chr1	151982915	151994390	413.448	442.299	384.596	-0.201191	0.0223973	0.238884
ENSG00000198431	TXNRD1	chr12	104215779	104350305	1080.62	1126.54	1034.7	-0.122576	0.0224589	0.239186
ENSG00000031081	ARHGAP31	chr3	119294373	119420714	859.354	899.528	819.18	-0.134829	0.0225049	0.239488
ENSG00000074416	MGLL	chr3	127689062	128052190	619.481	653.674	585.289	-0.159164	0.0225514	0.239794
ENSG00000126456	IRF3	chr19	49659569	49665875	145.097	128.352	161.842	0.332173	0.0226095	0.240223
ENSG00000088727	KIF9	chr3	47228026	47283451	49.6024	40.0435	59.1613	0.551681	0.0227004	0.240812
ENSG00000168522	FNTA	chr8	43034194	43085788	490.615	460.458	520.772	0.177221	0.0226868	0.240812
ENSG00000088325	TPX2	chr20	31739271	31801805	1231.07	1283.25	1178.89	-0.122273	0.0227246	0.240881
ENSG00000132635	PCED1A	chr20	2835314	2841190	52.93	42.4524	63.4075	0.567791	0.022768	0.24108
ENSG00000150991	UBC	chr12	124911604	124917368	657.816	693.898	621.735	-0.158183	0.022779	0.24108
ENSG00000173137	ADCK5	chr8	144373101	144393242	29.0555	21.6825	36.4286	0.722556	0.0227991	0.241106
ENSG00000072682	P4HA2	chr5	132191838	132295315	482.222	512.251	452.194	-0.179536	0.0228399	0.241349
ENSG00000083444	PLOD1	chr1	11934205	11975538	373.662	400.644	346.68	-0.208157	0.0228814	0.241599
ENSG00000196352	CD55	chr1	207321376	207386804	431.897	460.332	403.462	-0.189799	0.0229073	0.241685
ENSG00000026103	FAS	chr10	88990582	89015785	61.3668	50.5075	72.2261	0.507578	0.0229661	0.241846
ENSG00000030582	GRN	chr17	44345086	44353102	335.11	359.945	310.275	-0.213587	0.0230022	0.241846
ENSG00000088808	PPP1R13B	chr14	103733195	103847590	324.294	299.917	348.672	0.216639	0.0229786	0.241846
ENSG00000134452	FBH1	chr10	5890203	5937594	384.899	357.885	411.913	0.202318	0.0230058	0.241846
ENSG00000156011	PSD3	chr8	18527301	19084730	377.972	405.422	350.523	-0.209362	0.0230118	0.241846
ENSG00000107581	EIF3A	chr10	119033670	119080823	1740.56	1802.09	1679.02	-0.101999	0.0230735	0.241942
ENSG00000116539	ASH1L	chr1	155335268	155562807	1359.53	1306.05	1413.01	0.113471	0.0230715	0.241942
ENSG00000152223	EPG5	chr18	45847609	45967339	659.89	623.527	696.253	0.158918	0.0230922	0.241942
ENSG00000162994	CLHC1	chr2	55174791	55232563	98.9446	85.4566	112.433	0.391789	0.0230896	0.241942
ENSG00000067066	SP100	chr2	230415942	230544090	1344.48	1293.24	1395.72	0.109933	0.0234001	0.242653
ENSG00000108094	CUL2	chr10	35008551	35090642	756.027	793.706	718.348	-0.143732	0.0232628	0.242653
ENSG00000113580	NR3C1	chr5	143277931	143435512	890.088	847.636	932.54	0.137566	0.0232959	0.242653
ENSG00000119688	ABCD4	chr14	74285423	74303056	186.577	167.965	205.188	0.287233	0.0233468	0.242653
ENSG00000120885	CLU	chr8	27596917	27615031	101.539	115.417	87.6601	-0.392948	0.0234002	0.242653
ENSG00000130340	SNX9	chr6	157700387	157945077	440.988	469.348	412.629	-0.185392	0.0234236	0.242653
ENSG00000133030	MPRIP	chr17	17042545	17217679	2017.32	2080.44	1954.21	-0.0902571	0.0234699	0.242653
ENSG00000137841	PLCB2	chr15	40278176	40307935	24.7528	31.3816	18.1241	-0.759783	0.0234254	0.242653
ENSG00000165113	GKAP1	chr9	83739421	83829516	81.4543	68.929	93.9795	0.441725	0.0232255	0.242653
ENSG00000172757	CFL1	chr11	65823022	65862026	414.837	442.405	387.269	-0.19157	0.0234082	0.242653
ENSG00000172889	EGFL7	chr9	136658856	136672678	324.642	349.804	299.48	-0.223399	0.0234819	0.242653
ENSG00000176714	CCDC121	chr2	27625639	27629012	43.1467	34.1975	52.0958	0.593125	0.0232995	0.242653
ENSG00000177225	GATD1	chr11	767220	777488	210.213	189.526	230.901	0.283523	0.023436	0.242653
ENSG00000182871	COL18A1	chr21	45405137	45513720	735.377	773.271	697.483	-0.148613	0.0234372	0.242653
ENSG00000197024	ZNF398	chr7	149126416	149182802	309.763	285.542	333.985	0.225353	0.0234799	0.242653
ENSG00000206562	METTL6	chr3	15381275	15440566	137.639	120.615	154.663	0.356109	0.0232322	0.242653
ENSG00000261371	PECAM1	chr17	64319415	64413776	985.215	1034.36	936.067	-0.143913	0.0234221	0.242653
ENSG00000275066	SYNRG	chr17	37514797	37609496	590.072	556.827	623.317	0.16246	0.0233452	0.242653
ENSG00000077380	DYNC1I2	chr2	171687409	171748420	569.588	602.18	536.996	-0.164993	0.0235208	0.242869
ENSG00000141642	ELAC1	chr18	50967991	50988121	47.751	38.1646	57.3374	0.57487	0.0235928	0.243428
ENSG00000101000	PROCR	chr20	35172073	35216240	304.285	328.637	279.933	-0.230651	0.0236738	0.243939
ENSG00000198551	ZNF627	chr19	11559374	11619135	203.512	183.783	223.242	0.279227	0.0236783	0.243939
ENSG00000240024	LINC00888	chr3	183447608	183456013	122.786	107.916	137.656	0.348302	0.0237252	0.244236
ENSG00000167306	MYO5B	chr18	49822813	50195093	26.5842	19.3613	33.8071	0.773553	0.0237531	0.244339
ENSG00000173875	ZNF791	chr19	12610918	12633840	280.535	258.023	303.047	0.231218	0.0237813	0.244443
ENSG00000157554	ERG	chr21	38380027	38661780	677.327	714.918	639.737	-0.160061	0.02381	0.244552
ENSG00000106012	IQCE	chr7	2558972	2614734	248.251	226.181	270.321	0.256156	0.0238503	0.244781
ENSG00000123689	G0S2	chr1	209675420	209676388	45.9107	55.1943	36.6272	-0.578649	0.0238757	0.244856
ENSG00000213398	LCAT	chr16	67939750	67944131	41.19	32.2934	50.0867	0.61771	0.0239032	0.244954
ENSG00000111788	AC009533.1	chr12	9277235	9313241	66.7586	55.6186	77.8985	0.478722	0.0239282	0.244958
ENSG00000177943	MAMDC4	chr9	136850943	136860799	16.1705	10.7709	21.57	0.939176	0.0239577	0.244958
ENSG00000186111	PIP5K1C	chr19	3630183	3700479	359.291	384.91	333.671	-0.20552	0.0239472	0.244958
ENSG00000156515	HK1	chr10	69269984	69401884	840.073	879.549	800.598	-0.135523	0.0239887	0.245089
ENSG00000129250	KIF1C	chr17	4997948	5028401	976.724	1020.53	932.917	-0.129367	0.0240345	0.245373
ENSG00000077097	TOP2B	chr3	25597905	25664907	1158.69	1206.24	1111.14	-0.118363	0.0241259	0.24612
ENSG00000135205	CCDC146	chr7	77122434	77329533	35.2916	27.0835	43.4997	0.664071	0.0242526	0.247227
ENSG00000196663	TECPR2	chr14	102362963	102502481	388.031	361.108	414.954	0.200004	0.0243228	0.24757
ENSG00000203865	ATP1A1-AS1	chr1	116392247	116418622	37.6707	29.4013	45.94	0.626685	0.0243196	0.24757
ENSG00000124570	SERPINB6	chr6	2948159	2972165	417.744	445.677	389.811	-0.192761	0.0243582	0.247596
ENSG00000279348	AC012513.3	chr2	216211404	216213519	144.4	127.948	160.851	0.327885	0.0243618	0.247596
ENSG00000119285	HEATR1	chr1	236549005	236604504	1257.72	1306.29	1209.15	-0.111385	0.0244135	0.247935
ENSG00000184428	TOP1MT	chr8	143304384	143359979	139.654	155.592	123.716	-0.328361	0.024463	0.248252
ENSG00000073792	IGF2BP2	chr3	185643739	185825056	1086.29	1130.79	1041.8	-0.118141	0.0245776	0.248897
ENSG00000108433	GOSR2	chr17	46923075	46975524	359.195	333.301	385.089	0.207784	0.0245668	0.248897
ENSG00000196689	TRPV1	chr17	3565444	3609411	22.6092	16.2489	28.9695	0.79699	0.0245815	0.248897
ENSG00000132323	ILKAP	chr2	238170401	238203729	256.56	235.061	278.06	0.241415	0.0246407	0.24931
ENSG00000136205	TNS3	chr7	47275154	47582558	341.216	366.051	316.382	-0.209761	0.0247369	0.249911
ENSG00000168461	RAB31	chr18	9708165	9862551	406.185	433.981	378.388	-0.197281	0.0247207	0.249911
ENSG00000004478	FKBP4	chr12	2794953	2805423	664.205	699.794	628.616	-0.154518	0.0248864	0.250148
ENSG00000095383	TBC1D2	chr9	98198999	98255721	324.692	348.846	300.539	-0.214377	0.0248493	0.250148
ENSG00000105397	TYK2	chr19	10350529	10380676	355.813	330.322	381.304	0.206488	0.0248091	0.250148
ENSG00000115963	RND3	chr2	150468195	150539011	368.428	394.274	342.582	-0.202199	0.0248577	0.250148
ENSG00000120129	DUSP1	chr5	172768090	172771195	269.917	292.407	247.426	-0.240088	0.0247997	0.250148
ENSG00000140403	DNAJA4	chr15	78264086	78282196	112.615	126.738	98.4924	-0.360524	0.0248229	0.250148
ENSG00000274471	AC242376.2	chr15	23309607	23314566	37.0839	28.6917	45.476	0.646427	0.0248894	0.250148
ENSG00000162814	SPATA17	chr1	217631324	217871696	11.4878	6.98213	15.9934	1.09013	0.0249202	0.250272
ENSG00000115677	HDLBP	chr2	241227264	241317061	1928.61	1993.51	1863.71	-0.0970767	0.0249649	0.250536
ENSG00000012232	EXTL3	chr8	28600469	28755599	318.571	342.767	294.374	-0.218891	0.0250221	0.250924
ENSG00000103319	EEF2K	chr16	22206282	22288732	416.464	444.008	388.92	-0.190653	0.0250831	0.25125
ENSG00000134369	NAV1	chr1	201622885	201826969	1959.71	2019.6	1899.82	-0.0881589	0.0251102	0.25125
ENSG00000197779	ZNF81	chrX	47836902	48002561	181.625	163.118	200.133	0.293414	0.0250989	0.25125
ENSG00000185551	NR2F2	chr15	96325938	96340263	1012.39	1057.06	967.714	-0.127282	0.0251316	0.251279
ENSG00000134318	ROCK2	chr2	11179761	11348330	1536.69	1591.68	1481.71	-0.103211	0.0252896	0.252673
ENSG00000107938	EDRF1	chr10	125719515	125764143	522.817	491.113	554.522	0.174856	0.0253385	0.252789
ENSG00000127311	HELB	chr12	66302545	66347645	159.97	143.188	176.752	0.301914	0.0253369	0.252789
ENSG00000177464	GPR4	chr19	45589764	45602208	215.059	234.985	195.134	-0.266849	0.0254098	0.253128
ENSG00000181163	NPM1	chr5	171387116	171411137	717.948	754.808	681.088	-0.148063	0.0254055	0.253128
ENSG00000115008	IL1A	chr2	112773915	112784590	7.90572	4.15955	11.6519	1.29403	0.0254468	0.253311
ENSG00000113108	APBB3	chr5	140558268	140564781	22.311	16.0095	28.6124	0.79986	0.0255495	0.254146
ENSG00000004487	KDM1A	chr1	23019443	23083689	741.286	778.476	704.096	-0.144685	0.0256707	0.254362
ENSG00000051620	HEBP2	chr6	138403531	138422197	181.754	163.799	199.71	0.284407	0.0256837	0.254362
ENSG00000101290	CDS2	chr20	5126786	5197887	443.377	471.901	414.852	-0.18547	0.0256282	0.254362
ENSG00000119965	C10orf88	chr10	122930903	122954403	122.5	107.735	137.265	0.346621	0.0256296	0.254362
ENSG00000172270	BSG	chr19	571277	583493	587.577	620.107	555.047	-0.159634	0.0256645	0.254362
ENSG00000223547	ZNF844	chr19	12064699	12081565	208.715	188.535	228.895	0.278514	0.0255939	0.254362
ENSG00000105971	CAV2	chr7	116287380	116508541	787.031	826.529	747.533	-0.144745	0.0258341	0.255165
ENSG00000117305	HMGCL	chr1	23801885	23838620	76.79	65.1521	88.4279	0.434937	0.0258887	0.255165
ENSG00000117408	IPO13	chr1	43946939	43968022	213.333	193.565	233.1	0.266872	0.0259227	0.255165
ENSG00000120451	SNX19	chr11	130875436	130916509	572.077	538.539	605.615	0.169053	0.0259096	0.255165
ENSG00000166949	SMAD3	chr15	67063763	67195195	626.93	661.654	592.206	-0.159721	0.0258041	0.255165
ENSG00000167460	TPM4	chr19	16067021	16103005	1343.16	1393.55	1292.76	-0.108231	0.025934	0.255165
ENSG00000173273	TNKS	chr8	9555914	9782346	718.984	682.039	755.93	0.148192	0.0258603	0.255165
ENSG00000177565	TBL1XR1	chr3	177019340	177228000	1263.63	1312.98	1214.28	-0.112648	0.0258624	0.255165
ENSG00000178685	PARP10	chr8	143977153	144012772	238.847	215.744	261.95	0.278797	0.0259329	0.255165
ENSG00000107438	PDLIM1	chr10	95237572	95291024	284.268	308.284	260.251	-0.243493	0.0259691	0.255266
ENSG00000163472	TMEM79	chr1	156282935	156293185	36.4746	28.3276	44.6215	0.637455	0.0259819	0.255266
ENSG00000179604	CDC42EP4	chr17	73283624	73312175	196.308	215.292	177.324	-0.278477	0.0260355	0.25544
ENSG00000187555	USP7	chr16	8892094	8964514	897.015	938.107	855.923	-0.132124	0.0260373	0.25544
ENSG00000126351	THRA	chr17	40058290	40093867	309.399	333.119	285.679	-0.220924	0.0261181	0.255863
ENSG00000152558	TMEM123	chr11	102396332	102470384	1520.03	1573.31	1466.74	-0.101124	0.026101	0.255863
ENSG00000011332	DPF1	chr19	38211006	38229714	75.5705	63.6811	87.46	0.45168	0.0262508	0.256874
ENSG00000075651	PLD1	chr3	171600405	171810950	368.733	416.95	320.516	-0.378442	0.0262591	0.256874
ENSG00000180764	PIPSL	chr10	93958191	93961540	10.6203	14.8363	6.40436	-1.09679	0.0263111	0.257197
ENSG00000131469	RPL27	chr17	42998273	43002959	143.268	159.592	126.944	-0.327887	0.026363	0.257354
ENSG00000142864	SERBP1	chr1	67407810	67430415	1189.96	1237.59	1142.33	-0.11546	0.0263652	0.257354
ENSG00000143384	MCL1	chr1	150574551	150579738	1185.28	1231.81	1138.76	-0.113211	0.0264026	0.257535
ENSG00000182670	TTC3	chr21	37073226	37203112	1067.97	1112.73	1023.22	-0.120885	0.0264664	0.257971
ENSG00000100583	SAMD15	chr14	77376689	77391497	37.6193	29.534	45.7045	0.613144	0.0265122	0.258221
ENSG00000105738	SIPA1L3	chr19	37907228	38208372	901.177	941.628	860.725	-0.129461	0.0265723	0.258221
ENSG00000125257	ABCC4	chr13	95019829	95301475	530.108	560.689	499.527	-0.166325	0.0265714	0.258221
ENSG00000180957	PITPNB	chr22	27851669	27920134	789.257	826.606	751.909	-0.136468	0.0265872	0.258221
ENSG00000204386	NEU1	chr6	31857659	31862906	283.055	260.314	305.796	0.231492	0.0265856	0.258221
ENSG00000107020	PLGRKT	chr9	5357973	5437878	53.932	63.7355	44.1284	-0.520523	0.0266548	0.258693
ENSG00000128915	ICE2	chr15	60419609	60479160	672.226	637.275	707.178	0.149932	0.0267658	0.259213
ENSG00000165338	HECTD2	chr10	91409280	91514829	364.12	338.336	389.903	0.204095	0.0267408	0.259213
ENSG00000204574	ABCF1	chr6	30571376	30597179	675.931	712.308	639.554	-0.155204	0.0267497	0.259213
ENSG00000090376	IRAK3	chr12	66188879	66254622	191.046	172.373	209.72	0.281449	0.0269388	0.260349
ENSG00000130734	ATG4D	chr19	10543895	10553418	68.3035	57.3675	79.2395	0.459147	0.026904	0.260349
ENSG00000160789	LMNA	chr1	156082573	156140089	1095.98	1141.72	1050.23	-0.120391	0.0269406	0.260349
ENSG00000180182	MED14	chrX	40648306	40735858	525.567	556.855	494.279	-0.17165	0.0270016	0.260753
ENSG00000092094	OSGEP	chr14	20446411	20455105	221.453	201.936	240.969	0.253792	0.0270353	0.26077
ENSG00000109606	DHX15	chr4	24517441	24584550	1090.27	1134.01	1046.53	-0.115712	0.0270418	0.26077
ENSG00000258457	AL132780.2	chr14	22982698	22999078	24.0178	17.5527	30.483	0.762944	0.0270624	0.260784
ENSG00000115232	ITGA4	chr2	181457202	181536187	544.484	575.848	513.121	-0.166084	0.0271082	0.261039
ENSG00000139697	SBNO1	chr12	123289109	123364843	1438.94	1489.21	1388.67	-0.100773	0.0271351	0.261113
ENSG00000138385	SSB	chr2	169791933	169812064	568.453	600.667	536.239	-0.163401	0.0271648	0.261214
ENSG00000007541	PIGQ	chr16	566995	584136	86.2221	73.7721	98.6721	0.414689	0.0272201	0.261374
ENSG00000143321	HDGF	chr1	156742107	156766925	675.564	710.599	640.528	-0.149551	0.027207	0.261374
ENSG00000166974	MAPRE2	chr18	34976928	35143470	339.676	363.928	315.423	-0.205759	0.0272448	0.261426
ENSG00000069431	ABCC9	chr12	21797401	21942529	15.5545	10.237	20.872	0.960829	0.0273289	0.261887
ENSG00000100994	PYGB	chr20	25248069	25298014	571.201	604.471	537.931	-0.167957	0.027366	0.261887
ENSG00000138764	CCNG2	chr4	77157151	77433388	117.161	102.839	131.482	0.35144	0.0273609	0.261887
ENSG00000147180	ZNF711	chrX	85244032	85273362	72.3856	61.289	83.4822	0.43967	0.0273699	0.261887
ENSG00000100596	SPTLC2	chr14	77505997	77616773	1122.83	1168.2	1077.46	-0.116545	0.0274155	0.262138
ENSG00000153214	TMEM87B	chr2	112055223	112119318	337.831	362.184	313.478	-0.207743	0.0274861	0.262628
ENSG00000054267	ARID4B	chr1	235131634	235328219	1031.97	988.786	1075.16	0.120706	0.0275513	0.263065
ENSG00000221829	FANCG	chr9	35073835	35080016	256.517	235.43	277.604	0.236805	0.0275761	0.263117
ENSG00000022267	FHL1	chrX	136146702	136211359	186.371	204.783	167.959	-0.284448	0.0276439	0.263209
ENSG00000081923	ATP8B1	chr18	57646426	57803315	528.425	560.724	496.126	-0.176251	0.0276385	0.263209
ENSG00000261526	AC012615.1	chr19	1874871	1876169	24.8535	18.2968	31.4102	0.748088	0.0276145	0.263209
ENSG00000221909	FAM200A	chr7	99546308	99558536	171.435	154.159	188.71	0.290047	0.0276733	0.263304
ENSG00000164283	ESM1	chr5	54977864	55022671	487.275	516.542	458.008	-0.173156	0.0277216	0.263579
ENSG00000118257	NRP2	chr2	205681990	205798133	885.161	925.513	844.809	-0.131478	0.0277655	0.263626
ENSG00000198169	ZNF251	chr8	144720907	144756417	151.583	135.164	168.001	0.311687	0.0277565	0.263626
ENSG00000105982	RNF32	chr7	156640281	156677130	10.3892	6.17695	14.6014	1.12023	0.0278895	0.263675
ENSG00000137309	HMGA1	chr6	34236873	34246231	527.669	558.89	496.448	-0.170597	0.0278382	0.263675
ENSG00000143493	INTS7	chr1	211940399	212035542	550.931	519.288	582.573	0.165601	0.0278042	0.263675
ENSG00000149218	ENDOD1	chr11	95089810	95132645	307.708	331.908	283.507	-0.226659	0.0278327	0.263675
ENSG00000249115	HAUS5	chr19	35612744	35625349	249.149	227.933	270.365	0.245309	0.0278964	0.263675
ENSG00000267100	ILF3-DT	chr19	10651862	10653844	75.103	63.3197	86.8864	0.45038	0.0279067	0.263675
ENSG00000276234	TADA2A	chr17	37406874	37479730	222.671	202.16	243.181	0.265336	0.0278697	0.263675
ENSG00000114405	C3orf14	chr3	62318973	62336213	132.451	117.205	147.696	0.331071	0.0280278	0.264268
ENSG00000148842	CNNM2	chr10	102918293	103090221	107.359	92.9002	121.817	0.387311	0.0280473	0.264268
ENSG00000169764	UGP2	chr2	63840940	63891562	691.166	726.957	655.375	-0.149332	0.0280317	0.264268
ENSG00000273749	CYFIP1	chr15	22867052	22981063	663.535	697.343	629.727	-0.14692	0.028008	0.264268
ENSG00000184232	OAF	chr11	120210767	120230332	142.4	159.253	125.548	-0.34067	0.0280827	0.264418
ENSG00000085382	HACE1	chr6	104728093	104859919	308.368	284.112	332.623	0.226691	0.0282013	0.26465
ENSG00000108953	YWHAE	chr17	1344272	1400378	966.477	1009.35	923.607	-0.127939	0.0281743	0.26465
ENSG00000111371	SLC38A1	chr12	46183063	46270017	1748.45	1805.82	1691.09	-0.0946435	0.0281803	0.26465
ENSG00000112419	PHACTR2	chr6	143536845	143831185	1637.34	1692.64	1582.05	-0.0974188	0.0281522	0.26465
ENSG00000121966	CXCR4	chr2	136114349	136118165	8.08155	11.781	4.38214	-1.24775	0.0282049	0.26465
ENSG00000000457	SCYL3	chr1	169849631	169894267	147.536	131.742	163.329	0.307963	0.0282391	0.264788
ENSG00000101745	ANKRD12	chr18	9136228	9285985	1159.67	1112.51	1206.82	0.117295	0.028288	0.265062
ENSG00000137221	TJAP1	chr6	43477523	43506556	242.279	221.751	262.808	0.244059	0.0283581	0.265062
ENSG00000159658	EFCAB14	chr1	46675159	46719064	823.824	862.966	784.681	-0.13703	0.0283363	0.265062
ENSG00000198826	ARHGAP11A	chr15	32615144	32639949	875.478	914.802	836.155	-0.129541	0.0283494	0.265062
ENSG00000237870	AC073130.1	chr7	116275606	116286734	148.244	164.749	131.74	-0.320394	0.028366	0.265062
ENSG00000160584	SIK3	chr11	116843402	117098437	448.553	419.709	477.397	0.185385	0.0284039	0.265233
ENSG00000147475	ERLIN2	chr8	37736601	37759101	335.333	359.46	311.207	-0.207335	0.0284268	0.265265
ENSG00000115073	ACTR1B	chr2	97655963	97664107	137.966	121.852	154.08	0.336092	0.0285025	0.265605
ENSG00000137266	SLC22A23	chr6	3268962	3457022	95.8851	108.786	82.9839	-0.386513	0.0285024	0.265605
ENSG00000134954	ETS1	chr11	128458761	128587558	1210.62	1257.68	1163.57	-0.112115	0.0285332	0.26571
ENSG00000172167	MTBP	chr8	120445400	120542133	427.571	399.744	455.397	0.187609	0.0285561	0.265728
ENSG00000226752	CUTALP	chr9	120824828	120854385	222.245	202.171	242.319	0.260152	0.0285744	0.265728
ENSG00000182551	ADI1	chr2	3497361	3519736	307.765	331.848	283.682	-0.22551	0.0286318	0.266079
ENSG00000124171	PARD6B	chr20	50731544	50756795	19.5968	13.7997	25.3938	0.834634	0.028701	0.266404
ENSG00000139116	KIF21A	chr12	39293228	39443390	43.6044	34.7439	52.4648	0.580892	0.028706	0.266404
ENSG00000131931	THAP1	chr8	42836674	42843325	403.641	377.295	429.986	0.188128	0.0287346	0.266487
ENSG00000267419	AC011477.1	chr19	19776602	19836073	15.8627	10.7417	20.9838	0.904791	0.02876	0.266541
ENSG00000102921	N4BP1	chr16	48538726	48620148	532.858	502.37	563.347	0.164962	0.0288965	0.267441
ENSG00000146587	RBAK	chr7	5045821	5069488	462.422	434.066	490.778	0.176773	0.0288885	0.267441
ENSG00000129028	THAP10	chr15	70881342	70892785	95.495	82.7778	108.212	0.382495	0.0289507	0.26776
ENSG00000147202	DIAPH2	chrX	96684663	97604997	472.071	500.493	443.649	-0.173565	0.0289856	0.2679
ENSG00000181019	NQO1	chr16	69706996	69726951	463.94	492.984	434.896	-0.18048	0.0290319	0.268145
ENSG00000070371	CLTCL1	chr22	19179473	19291716	80.8775	68.8791	92.8759	0.425895	0.0290937	0.268263
ENSG00000082641	NFE2L1	chr17	48048329	48061487	989.424	1031.62	947.223	-0.123018	0.0291041	0.268263
ENSG00000169519	METTL15	chr11	28108248	28527041	192.914	174.979	210.848	0.267629	0.0290814	0.268263
ENSG00000198624	CCDC69	chr5	151181052	151224145	235.982	257.11	214.854	-0.257932	0.0291723	0.26871
ENSG00000136295	TTYH3	chr7	2631951	2664802	353.675	378.98	328.369	-0.206219	0.0292948	0.269644
ENSG00000138071	ACTR2	chr2	65227753	65271253	1241.25	1287.74	1194.76	-0.108038	0.0293134	0.269644
ENSG00000082153	BZW1	chr2	200810594	200827338	588.308	620.633	555.983	-0.158428	0.0293471	0.269771
ENSG00000204934	ATP6V0E2-AS1	chr7	149867697	149880610	28.4473	21.514	35.3805	0.692344	0.0294009	0.270082
ENSG00000169499	PLEKHA2	chr8	38901235	38973909	412.621	439.206	386.036	-0.18571	0.029445	0.270121
ENSG00000213722	DDAH2	chr6	31727038	31730617	191.767	209.816	173.718	-0.270952	0.0294411	0.270121
ENSG00000085117	CD82	chr11	44564427	44620363	68.675	79.8778	57.4723	-0.467991	0.0295136	0.270568
ENSG00000108599	AKAP10	chr17	19904302	19978343	503.058	473.132	532.983	0.171505	0.0295371	0.270601
ENSG00000143387	CTSK	chr1	150796208	150808323	21.1489	15.2389	27.059	0.789015	0.0295656	0.270678
ENSG00000196584	XRCC2	chr7	152644779	152676165	389.548	363.868	415.227	0.189996	0.0296317	0.270926
ENSG00000228801	AC064807.1	chr8	51899325	51947173	15.9975	10.7351	21.2599	0.923616	0.0296326	0.270926
ENSG00000138686	BBS7	chr4	121824440	121870497	320.875	297.306	344.444	0.211659	0.0297141	0.271389
ENSG00000149573	MPZL2	chr11	118253403	118264536	180.405	215.038	145.772	-0.55771	0.0297232	0.271389
ENSG00000117475	BLZF1	chr1	169367970	169396540	381.166	354.68	407.651	0.200287	0.0298539	0.272033
ENSG00000129422	MTUS1	chr8	17643795	17800917	274.238	296.893	251.584	-0.238032	0.0298468	0.272033
ENSG00000247121	AC009126.1	chr5	96814028	96935809	16.7052	11.3757	22.0348	0.896298	0.0298148	0.272033
ENSG00000053254	FOXN3	chr14	89124871	89619149	789.86	826.577	753.144	-0.134054	0.0298947	0.27204
ENSG00000181873	IBA57	chr1	228165815	228182257	171.989	154.442	189.537	0.293697	0.0298912	0.27204
ENSG00000182718	ANXA2	chr15	60347134	60402883	1073.41	1117.4	1029.43	-0.118187	0.029918	0.272069
ENSG00000184432	COPB2	chr3	139355600	139389732	1083.14	1126.34	1039.94	-0.115032	0.0299852	0.272498
ENSG00000116161	CACYBP	chr1	174999163	175011715	395.616	421.609	369.623	-0.189371	0.0300397	0.272775
ENSG00000170776	AKAP13	chr15	85380571	85749358	1126.45	1172.15	1080.75	-0.117016	0.0300559	0.272775
ENSG00000027001	MIPEP	chr13	23730189	23889419	141.832	126.482	157.182	0.311289	0.0301179	0.273126
ENSG00000136147	PHF11	chr13	49495610	49528987	543.076	512.583	573.57	0.161886	0.0301348	0.273126
ENSG00000134955	SLC37A2	chr11	125063067	125090312	53.6077	44.1097	63.1056	0.507012	0.0302362	0.273148
ENSG00000184357	HIST1H1B	chr6	27866849	27867529	319.457	343.556	295.358	-0.217394	0.0302303	0.273148
ENSG00000197321	SVIL	chr10	29457338	29736781	695.584	730.603	660.565	-0.145178	0.0302412	0.273148
ENSG00000215190	LINC00680	chr6	57946074	57961501	74.032	62.8945	85.1694	0.431483	0.0302251	0.273148
ENSG00000221883	ARIH2OS	chr3	48917782	48919385	21.0695	15.1699	26.9692	0.790534	0.0302581	0.273148
ENSG00000278588	HIST1H2BI	chr6	26272976	26273356	191.51	210.397	172.623	-0.28399	0.0301965	0.273148
ENSG00000170027	YWHAG	chr7	76326794	76359031	1210.89	1257.5	1164.29	-0.111013	0.0302884	0.27324
ENSG00000083097	DOP1A	chr6	83067666	83171350	359.071	334.538	383.605	0.196902	0.0304563	0.274389
ENSG00000110047	EHD1	chr11	64851642	64888296	517.631	547.166	488.096	-0.164497	0.03045	0.274389
ENSG00000120438	TCP1	chr6	159778498	159789749	862.618	901.262	823.973	-0.1292	0.030566	0.274727
ENSG00000139350	NEDD1	chr12	96907223	96953777	560.983	530.061	591.906	0.158926	0.0305748	0.274727
ENSG00000256223	ZNF10	chr12	133130575	133159465	74.3424	62.8255	85.8593	0.444546	0.0305385	0.274727
ENSG00000275835	TUBGCP5	chr15	22983192	23039673	514.609	484.718	544.501	0.167463	0.0305542	0.274727
ENSG00000167779	IGFBP6	chr12	53097436	53102345	148.825	165.467	132.183	-0.321833	0.0306246	0.274993
ENSG00000174371	EXO1	chr1	241847967	241895148	667.349	634.016	700.683	0.144026	0.0307097	0.275575
ENSG00000167600	CYP2S1	chr19	41193049	41207539	66.4201	77.0101	55.8302	-0.457002	0.0308112	0.276303
ENSG00000233266	HMGB1P31	chr2	54051334	54051760	9.95525	5.9084	14.0021	1.11874	0.0308403	0.276381
ENSG00000110768	GTF2H1	chr11	18322295	18367044	840.231	802.831	877.631	0.128365	0.0309768	0.277241
ENSG00000123200	ZC3H13	chr13	45954465	46052759	1116.53	1161.4	1071.65	-0.115927	0.0309771	0.277241
ENSG00000148154	UGCG	chr9	111896766	111935369	465.169	493.273	437.065	-0.174165	0.0310503	0.277685
ENSG00000162430	SELENON	chr1	25800176	25818224	306.82	329.516	284.124	-0.21313	0.0310676	0.277685
ENSG00000075223	SEMA3C	chr7	80742538	80922359	688.16	723.159	653.16	-0.146661	0.0312217	0.278329
ENSG00000138594	TMOD3	chr15	51829628	51947295	1407.25	1457.73	1356.78	-0.103462	0.0312087	0.278329
ENSG00000162825	NBPF20	chr1	145289900	145405778	53.3122	44.0022	62.6222	0.499534	0.0311817	0.278329
ENSG00000240429	LRRFIP1P1	chr3	179259028	179261273	22.3146	16.3139	28.3154	0.759726	0.0311725	0.278329
ENSG00000112137	PHACTR1	chr6	12716805	13290484	70.6539	81.8173	59.4904	-0.453226	0.0313778	0.279536
ENSG00000121858	TNFSF10	chr3	172505508	172523507	34.9081	42.5299	27.2864	-0.6219	0.0314153	0.279687
ENSG00000123213	NLN	chr5	65722196	65871725	668.205	701.526	634.884	-0.143787	0.0314835	0.28011
ENSG00000057019	DCBLD2	chr3	98795941	98901689	1412.65	1462.11	1363.18	-0.101007	0.0315917	0.280172
ENSG00000073169	SELENOO	chr22	50200979	50217616	105.964	92.8391	119.088	0.355833	0.031515	0.280172
ENSG00000126785	RHOJ	chr14	63204114	63293219	246.288	267.376	225.201	-0.246653	0.0315724	0.280172
ENSG00000136881	BAAT	chr9	101360417	101383519	9.86742	5.80357	13.9313	1.13398	0.0315937	0.280172
ENSG00000205339	IPO7	chr11	9384622	9448126	1970.54	2029.86	1911.22	-0.0868418	0.0315491	0.280172
ENSG00000115524	SF3B1	chr2	197389784	197435091	1936.55	1994.76	1878.34	-0.0867113	0.0316567	0.280548
ENSG00000185133	INPP5J	chr22	31122731	31134696	21.7821	15.4153	28.1488	0.82839	0.031721	0.280933
ENSG00000198858	R3HDM4	chr19	896503	913245	109.039	122.315	95.7636	-0.34981	0.0318388	0.281793
ENSG00000185267	CDNF	chr10	14819250	14838575	8.09295	4.49711	11.6888	1.20681	0.0319495	0.282589
ENSG00000106392	C1GALT1	chr7	7156934	7248651	359.972	385.112	334.833	-0.201274	0.032045	0.283248
ENSG00000133812	SBF2	chr11	9778667	10294207	596.183	627.241	565.124	-0.150202	0.0321889	0.28415
ENSG00000275131	AC241952.1	chr1	120489860	120701289	60.059	50.1832	69.9348	0.470825	0.0321722	0.28415
ENSG00000107829	FBXW4	chr10	101610664	101695295	107.514	94.119	120.91	0.358006	0.0322731	0.284709
ENSG00000124788	ATXN1	chr6	16299112	16761491	344.88	370.124	319.636	-0.210965	0.0323519	0.285218
ENSG00000044115	CTNNA1	chr5	138610967	138935034	1293.69	1341.38	1246	-0.106335	0.0324014	0.285369
ENSG00000108828	VAT1	chr17	43014605	43025123	462.772	490.266	435.279	-0.171253	0.0324111	0.285369
ENSG00000176945	MUC20	chr3	195720882	195741123	13.3526	8.55316	18.152	1.00345	0.0324844	0.285829
ENSG00000147459	DOCK5	chr8	25184723	25418082	1063.94	1105.46	1022.41	-0.112555	0.0325532	0.286064
ENSG00000197601	FAR1	chr11	13668670	13732346	753.106	788.1	718.112	-0.133991	0.0325419	0.286064
ENSG00000240891	PLCXD2	chr3	111674676	111846447	158.153	141.977	174.329	0.294284	0.0326196	0.286461
ENSG00000231925	TAPBP	chr6	33299694	33314387	287.63	310.582	264.677	-0.229939	0.0327782	0.287668
ENSG00000184743	ATL3	chr11	63624087	63671921	1213.21	1257.91	1168.5	-0.106279	0.0328828	0.2884
ENSG00000073050	XRCC1	chr19	43543040	43580473	190.816	173.007	208.624	0.268653	0.0329793	0.288686
ENSG00000107614	TRDMT1	chr10	17142254	17202054	207.886	189.339	226.433	0.256873	0.0329676	0.288686
ENSG00000188522	FAM83G	chr17	18968789	19004804	359.205	334.102	384.308	0.201414	0.0329603	0.288686
ENSG00000132589	FLOT2	chr17	28879335	28897679	375.405	401.494	349.315	-0.200312	0.0330148	0.28881
ENSG00000100162	CENPM	chr22	41938721	41947164	59.1098	49.3019	68.9177	0.475047	0.0330529	0.288815
ENSG00000131507	NDFIP1	chr5	142108505	142154443	595.654	626.84	564.468	-0.150952	0.033058	0.288815
ENSG00000176058	TPRN	chr9	137191617	137204193	79.3882	67.8765	90.8999	0.416052	0.0330918	0.288925
ENSG00000100591	AHSA1	chr14	77457870	77469474	319.721	342.929	296.512	-0.209161	0.0331686	0.28941
ENSG00000164649	CDCA7L	chr7	21900900	21946084	450.389	478.244	422.534	-0.178284	0.0331998	0.289495
ENSG00000166741	NNMT	chr11	114257787	114313285	254.97	275.467	234.473	-0.231544	0.0332462	0.289714
ENSG00000157429	ZNF19	chr16	71464555	71565089	30.6007	23.5261	37.6752	0.65709	0.0334073	0.290744
ENSG00000168385	SEPT2	chr2	241315100	241354027	1194.64	1239.59	1149.69	-0.10853	0.0333932	0.290744
ENSG00000073350	LLGL2	chr17	75525080	75575208	10.4184	14.4324	6.40436	-1.05951	0.0335306	0.290852
ENSG00000108819	PPP1R9B	chr17	50133735	50150630	433.567	461.875	405.258	-0.188227	0.0335143	0.290852
ENSG00000132436	FIGNL1	chr7	50444128	50542535	685.12	650.783	719.456	0.144517	0.0334947	0.290852
ENSG00000156508	EEF1A1	chr6	73515750	73523797	634.829	667.191	602.466	-0.146988	0.0335912	0.290852
ENSG00000164307	ERAP1	chr5	96760810	96808100	510.717	541.865	479.57	-0.175847	0.0335821	0.290852
ENSG00000182481	KPNA2	chr17	68035519	68046842	791.523	828.929	754.117	-0.136287	0.0334822	0.290852
ENSG00000197989	SNHG12	chr1	28578538	28583132	162.123	145.64	178.606	0.292557	0.0334571	0.290852
ENSG00000232104	RFX3-AS1	chr9	3526723	3691814	8.89904	5.13508	12.663	1.15512	0.0335562	0.290852
ENSG00000130779	CLIP1	chr12	122271432	122422632	1291.91	1337.54	1246.28	-0.101868	0.033639	0.29108
ENSG00000003393	ALS2	chr2	201700554	201781189	629.272	596.34	662.204	0.1509	0.0337016	0.291247
ENSG00000124496	TRERF1	chr6	42224931	42452051	169.62	189.074	150.166	-0.330431	0.0336972	0.291247
ENSG00000163840	DTX3L	chr3	122564238	122575203	1544.35	1491.13	1597.58	0.0994228	0.0337227	0.291247
ENSG00000176912	TYMSOS	chr18	641320	658340	7.79965	4.23253	11.3668	1.24089	0.0337656	0.291433
ENSG00000002586	CD99	chrX	2691133	2741309	382.819	409.006	356.631	-0.197176	0.034157	0.291732
ENSG00000048828	FAM120A	chr9	93451722	93566107	1238.52	1283.91	1193.13	-0.105698	0.0339808	0.291732
ENSG00000102265	TIMP1	chrX	47582313	47586789	175.491	192.199	158.782	-0.273983	0.0341472	0.291732
ENSG00000105538	RASIP1	chr19	48720587	48740721	170.54	188.552	152.529	-0.304078	0.0340074	0.291732
ENSG00000109686	SH3D19	chr4	151102751	151325632	866.735	904.419	829.051	-0.125385	0.0341003	0.291732
ENSG00000122642	FKBP9	chr7	32957404	33006931	246.986	267.024	226.948	-0.233662	0.0339246	0.291732
ENSG00000137154	RPS6	chr9	19375715	19380254	676.124	710.014	642.234	-0.144534	0.0341316	0.291732
ENSG00000143515	ATP8B2	chr1	154325553	154351307	570.305	600.461	540.149	-0.152446	0.033961	0.291732
ENSG00000145780	FEM1C	chr5	115520908	115544894	516.995	545.967	488.023	-0.16155	0.0339169	0.291732
ENSG00000152457	DCLRE1C	chr10	14897359	14954432	273.084	251.967	294.2	0.22274	0.0338727	0.291732
ENSG00000157036	EXOG	chr3	38496127	38542161	257.851	237.014	278.689	0.232773	0.0339239	0.291732
ENSG00000159958	TNFRSF13C	chr22	41922023	41926818	11.5777	7.31969	15.8357	1.01693	0.0339969	0.291732
ENSG00000168906	MAT2A	chr2	85539165	85545280	663.8	696.896	630.704	-0.143764	0.0340534	0.291732
ENSG00000176994	SMCR8	chr17	18315310	18328055	773.699	736.071	811.326	0.140254	0.0341432	0.291732
ENSG00000183150	GPR19	chr12	12660891	12696207	18.6202	13.1617	24.0786	0.82446	0.0341658	0.291732
ENSG00000185825	BCAP31	chrX	153700492	153724746	402.943	429.184	376.703	-0.187702	0.0338799	0.291732
ENSG00000213719	CLIC1	chr6	31730581	31739763	563.75	594.53	532.971	-0.157414	0.0341057	0.291732
ENSG00000271601	LIX1L	chr1	145933423	145958001	405.073	430.907	379.238	-0.183818	0.0342074	0.291904
ENSG00000186318	BACE1	chr11	117285207	117316259	440.7	413.915	467.485	0.175187	0.0342788	0.292329
ENSG00000124374	PAIP2B	chr2	71182739	71227083	34.865	27.3216	42.4084	0.616073	0.0343092	0.292404
ENSG00000092853	CLSPN	chr1	35720218	35769967	1563.54	1512.07	1615.01	0.0949585	0.0344219	0.292629
ENSG00000119328	FAM206A	chr9	108934181	108950744	173.052	156.234	189.87	0.279679	0.0343816	0.292629
ENSG00000152990	ADGRA3	chr4	22345071	22516054	126.253	140.709	111.798	-0.329198	0.0344152	0.292629
ENSG00000196345	ZKSCAN7	chr3	44555193	44594173	20.8045	14.8363	26.7728	0.810442	0.034387	0.292629
ENSG00000107937	GTPBP4	chr10	988019	1019936	533.755	563.416	504.093	-0.16021	0.0344852	0.292801
ENSG00000168497	CAVIN2	chr2	191834302	191847255	550.005	608.153	491.857	-0.305636	0.0344719	0.292801
ENSG00000121774	KHDRBS1	chr1	32013829	32060850	1032.38	1073.29	991.472	-0.114285	0.0345182	0.292811
ENSG00000173295	FAM86B3P	chr8	8228595	8244865	9.36223	5.50316	13.2213	1.12884	0.0345296	0.292811
ENSG00000157570	TSPAN18	chr11	44726465	44932421	117.149	130.942	103.355	-0.338407	0.0345845	0.292911
ENSG00000184007	PTP4A2	chr1	31906421	31944856	909.48	949.196	869.765	-0.125942	0.0345787	0.292911
ENSG00000083093	PALB2	chr16	23603160	23641310	472.896	445.325	500.467	0.16806	0.0346073	0.292921
ENSG00000033327	GAB2	chr11	78215297	78418348	192.386	209.927	174.845	-0.262441	0.0346317	0.292944
ENSG00000075618	FSCN1	chr7	5592823	5606655	478.711	506.587	450.834	-0.167863	0.0346803	0.293075
ENSG00000145725	PPIP5K2	chr5	103120149	103212799	773.954	808.896	739.013	-0.130187	0.0347029	0.293075
ENSG00000205413	SAMD9	chr7	93099513	93118023	2011.99	2070.19	1953.79	-0.0834497	0.0347119	0.293075
ENSG00000168298	HIST1H1E	chr6	26156354	26157107	260.714	281.148	240.28	-0.225746	0.034769	0.293374
ENSG00000115896	PLCL1	chr2	197804702	198572581	13.4036	8.727	18.0801	0.972005	0.0348119	0.293554
ENSG00000171055	FEZ2	chr2	36531805	36646087	636.008	667.858	604.157	-0.14439	0.0348587	0.293583
ENSG00000183775	KCTD16	chr5	144170832	144485686	215.666	195.105	236.227	0.274645	0.0348561	0.293583
ENSG00000101773	RBBP8	chr18	22798261	23026488	757.693	722.635	792.751	0.133423	0.0349211	0.293926
ENSG00000174485	DENND4A	chr15	65658046	65792293	720.046	685.28	754.812	0.13923	0.0349797	0.294238
ENSG00000136859	ANGPTL2	chr9	127087332	127122883	134.158	148.833	119.483	-0.314535	0.0350676	0.294666
ENSG00000229321	AC008269.1	chr2	206866795	206868289	9.92059	5.97475	13.8664	1.09184	0.0350741	0.294666
ENSG00000156170	NDUFAF6	chr8	94895767	95116455	173.223	156.78	189.666	0.27314	0.0351228	0.294893
ENSG00000108039	XPNPEP1	chr10	109864766	109923553	247.313	267.453	227.174	-0.234537	0.0352749	0.295074
ENSG00000112685	EXOC2	chr6	485133	693111	536.302	565.695	506.91	-0.158002	0.0352256	0.295074
ENSG00000137693	YAP1	chr11	102110461	102233423	779.059	814.024	744.095	-0.129417	0.0352616	0.295074
ENSG00000138376	BARD1	chr2	214725646	214809711	531.925	502.945	560.904	0.157057	0.035194	0.295074
ENSG00000166016	ABTB2	chr11	34150988	34358008	42.0685	33.8639	50.273	0.556464	0.035248	0.295074
ENSG00000196776	CD47	chr3	108043094	108091862	499.885	530.501	469.27	-0.176581	0.0352068	0.295074
ENSG00000103769	RAB11A	chr15	65726054	65891991	786.589	822.127	751.052	-0.130283	0.0353394	0.295249
ENSG00000152661	GJA1	chr6	121435577	121449727	970.085	1009.24	930.935	-0.116392	0.0353197	0.295249
ENSG00000170379	TCAF2	chr7	143620952	143730409	73.0358	84.3528	61.7187	-0.444542	0.0354083	0.295461
ENSG00000196653	ZNF502	chr3	44712643	44723831	80.2022	68.5787	91.8257	0.415879	0.0354054	0.295461
ENSG00000099625	CBARP	chr19	1228287	1238027	46.8475	38.0328	55.6622	0.5377	0.0355051	0.295664
ENSG00000142039	CCDC97	chr19	41310189	41324883	199.728	182.062	217.394	0.2546	0.0355192	0.295664
ENSG00000213694	S1PR3	chr9	88990863	89005010	181.45	198.341	164.559	-0.267893	0.0355198	0.295664
ENSG00000257511	AC084824.1	chr12	32726383	32727387	39.4615	31.6151	47.3078	0.566716	0.0355157	0.295664
ENSG00000256667	KLRA1P	chr12	10588063	10599669	35.4542	27.9887	42.9197	0.599378	0.0355534	0.295762
ENSG00000126883	NUP214	chr9	131125561	131234670	993.009	953.275	1032.74	0.115401	0.0357106	0.296743
ENSG00000166311	SMPD1	chr11	6390431	6394998	98.6788	111.778	85.5797	-0.381383	0.0357151	0.296743
ENSG00000143748	NVL	chr1	224227334	224330387	425.082	399.215	450.95	0.175386	0.0358086	0.297156
ENSG00000151502	VPS26B	chr11	134224645	134247792	358.902	382.694	335.111	-0.191019	0.0357888	0.297156
ENSG00000106853	PTGR1	chr9	111549722	111599893	259.213	279.365	239.062	-0.223898	0.0358525	0.297339
ENSG00000106462	EZH2	chr7	148807383	148884321	443.718	417.299	470.138	0.171614	0.0359174	0.297372
ENSG00000165244	ZNF367	chr9	96385941	96418329	595.439	564.642	626.236	0.149118	0.0358822	0.297372
ENSG00000181751	C5orf30	chr5	103258702	103278660	129.64	143.863	115.416	-0.315402	0.0359223	0.297372
ENSG00000204130	RUFY2	chr10	68341107	68407294	553.168	523.547	582.789	0.154375	0.035955	0.297462
ENSG00000080546	SESN1	chr6	108986437	109094819	179.009	161.826	196.191	0.276262	0.0359985	0.29764
ENSG00000103199	ZNF500	chr16	4748239	4767624	76.9705	66.0268	87.9143	0.407677	0.0361001	0.297786
ENSG00000111057	KRT18	chr12	52948871	52952901	326.535	351.256	301.814	-0.218192	0.0361687	0.297786
ENSG00000135315	CEP162	chr6	84124241	84227635	517.851	489.199	546.503	0.1595	0.0361309	0.297786
ENSG00000143110	C1orf162	chr1	111473792	111478512	18.1074	12.8242	23.3906	0.819133	0.0361918	0.297786
ENSG00000168785	TSPAN5	chr4	98470367	98658629	494.537	523.287	465.786	-0.167598	0.0361812	0.297786
ENSG00000198900	TOP1	chr20	41028818	41124487	1117.3	1160.84	1073.76	-0.112397	0.0361323	0.297786
ENSG00000257698	AC084033.3	chr12	57931528	57936175	87.4848	75.6497	99.3198	0.388255	0.0360666	0.297786
ENSG00000273015	AC008124.1	chr12	45718046	45727775	89.114	77.2229	101.005	0.382979	0.0360586	0.297786
ENSG00000128602	SMO	chr7	129188872	129213545	13.4067	17.9592	8.85409	-0.944107	0.0362461	0.298053
ENSG00000170802	FOXN2	chr2	48314637	48379294	631.7	599.283	664.117	0.147965	0.0362946	0.298271
ENSG00000065150	IPO5	chr13	97953658	98024297	1764.77	1817.62	1711.91	-0.0863965	0.036438	0.299268
ENSG00000012171	SEMA3B	chr3	50267558	50277546	12.017	7.65592	16.378	1.00551	0.036509	0.299428
ENSG00000096696	DSP	chr6	7541575	7586717	88.9876	76.9588	101.016	0.388016	0.0365678	0.299428
ENSG00000128284	APOL3	chr22	36140330	36166177	152.575	168.122	137.029	-0.29309	0.036522	0.299428
ENSG00000152642	GPD1L	chr3	32105689	32168713	307.716	331.556	283.877	-0.223261	0.0365421	0.299428
ENSG00000164292	RHOBTB3	chr5	95713522	95824383	614.075	645.544	582.606	-0.147754	0.0365535	0.299428
ENSG00000186174	BCL9L	chr11	118893875	118925608	618.508	651.092	585.924	-0.151902	0.0366182	0.29966
ENSG00000054793	ATP9A	chr20	51596514	51768634	277.926	299.041	256.81	-0.218853	0.0367373	0.300453
ENSG00000127920	GNG11	chr7	93921699	93928610	256.414	277.039	235.79	-0.231679	0.0367826	0.300461
ENSG00000257557	PPP1R12A-AS1	chr12	79934901	79942712	29.2696	22.4524	36.0868	0.661171	0.0367704	0.300461
ENSG00000076043	REXO2	chr11	114439386	114450279	278.982	300.269	257.696	-0.219794	0.0368165	0.300558
ENSG00000132881	CPLANE2	chr1	16231700	16237162	21.3029	15.6056	27.0002	0.753764	0.0368506	0.300655
ENSG00000112531	QKI	chr6	163414000	163578596	1382.16	1430.03	1334.29	-0.099902	0.0368867	0.300769
ENSG00000227268	KLLN	chr10	87859161	87863437	13.5242	8.89337	18.155	0.953189	0.0369383	0.301008
ENSG00000272405	AL365181.3	chr1	156641666	156644887	27.6768	21.0398	34.3139	0.680126	0.0369792	0.301161
ENSG00000152705	CATSPER3	chr5	134967906	135011707	10.6291	6.61404	14.6442	1.0389	0.0370762	0.301625
ENSG00000166432	ZMAT1	chrX	101882288	101932031	52.9507	43.697	62.2044	0.499846	0.0370807	0.301625
ENSG00000083750	RRAGB	chrX	55717739	55758774	98.2381	85.8212	110.655	0.362928	0.0371308	0.301671
ENSG00000163468	CCT3	chr1	156308968	156367873	939.146	978.488	899.804	-0.120813	0.0371274	0.301671
ENSG00000130150	MOSPD2	chrX	14873441	14922327	209.632	191.687	227.577	0.246426	0.0371996	0.302049
ENSG00000272906	AL353708.3	chr1	179881607	179882595	14.3942	9.60034	19.1881	0.929396	0.0372641	0.302392
ENSG00000113319	RASGRF2	chr5	80960672	81230156	9.14229	5.33944	12.9451	1.13733	0.0372936	0.30245
ENSG00000162733	DDR2	chr1	162631373	162787400	577.384	607.992	546.775	-0.152839	0.0374541	0.30357
ENSG00000239697	TNFSF12	chr17	7548891	7557890	16.0779	21.0782	11.0776	-0.870294	0.0375082	0.303828
ENSG00000152104	PTPN14	chr1	214348696	214552449	2106.03	2164.58	2047.48	-0.0802014	0.0375789	0.304219
ENSG00000117500	TMED5	chr1	93149742	93180728	949.318	987.57	911.065	-0.116207	0.0376561	0.30448
ENSG00000138029	HADHB	chr2	26243170	26290468	401.152	426.091	376.213	-0.179164	0.0376519	0.30448
ENSG00000275185	AC130324.3	chr17	30899110	30899651	26.3038	19.8355	32.7721	0.696787	0.0377084	0.304721
ENSG00000062725	APPBP2	chr17	60443149	60526219	493.938	466.28	521.596	0.161408	0.0377567	0.30493
ENSG00000069493	CLEC2D	chr12	9664969	9699555	30.5132	22.7493	38.2771	0.725804	0.0378246	0.305297
ENSG00000219626	FAM228B	chr2	24076526	24169640	85.2108	73.4266	96.9949	0.396889	0.0379001	0.305725
ENSG00000084090	STARD7	chr2	96184859	96208825	962.229	1001.32	923.136	-0.117169	0.037972	0.306123
ENSG00000163644	PPM1K	chr4	88257620	88284769	88.7675	76.6133	100.922	0.393084	0.0380283	0.306394
ENSG00000107796	ACTA2	chr10	88935074	88991339	26.6976	19.9329	33.4623	0.719249	0.0380806	0.306452
ENSG00000121940	CLCC1	chr1	108929508	108963457	380.589	404.927	356.251	-0.184283	0.038072	0.306452
ENSG00000159147	DONSON	chr21	33559542	33588708	362.667	339.219	386.116	0.186302	0.0381673	0.306967
ENSG00000063322	MED29	chr19	39391303	39400637	381.245	356.591	405.898	0.186357	0.0382579	0.307514
ENSG00000114904	NEK4	chr3	52708449	52770949	457.355	429.631	485.079	0.174738	0.0383301	0.307729
ENSG00000267470	ZNF571-AS1	chr19	37548914	37587348	23.5581	17.5885	29.5278	0.715711	0.0383206	0.307729
ENSG00000109436	TBC1D9	chr4	140620765	140756120	460.537	487.255	433.819	-0.16722	0.0384826	0.308589
ENSG00000128581	IFT22	chr7	101313367	101321823	168.77	152.394	185.146	0.279193	0.03847	0.308589
ENSG00000263235	AC006111.2	chr16	3650636	3651703	28.122	21.5551	34.6888	0.662015	0.0387217	0.31014
ENSG00000270106	TSNAX-DISC1	chr1	231528653	231819244	13.8976	9.33311	18.4621	0.913394	0.0387188	0.31014
ENSG00000092931	MFSD11	chr17	76735865	76781449	194.512	177.234	211.789	0.255648	0.0388494	0.310795
ENSG00000203485	INF2	chr14	104689606	104722535	541.073	570.634	511.511	-0.15751	0.0388363	0.310795
ENSG00000101367	MAPRE1	chr20	32819893	32850405	776.242	811.733	740.752	-0.131844	0.0389094	0.311092
ENSG00000103995	CEP152	chr15	48712928	48811146	577.733	547.213	608.253	0.152306	0.0389455	0.311197
ENSG00000105429	MEGF8	chr19	42325609	42378769	384.725	358.373	411.078	0.197432	0.0390282	0.311675
ENSG00000140853	NLRC5	chr16	56989485	57083531	261.375	241.216	281.534	0.222128	0.039059	0.311737
ENSG00000170734	POLH	chr6	43576150	43615660	308.893	287.041	330.745	0.203801	0.0391159	0.311824
ENSG00000186073	C15orf41	chr15	36579611	36810248	117.37	130.829	103.912	-0.329487	0.0391157	0.311824
ENSG00000197956	S100A6	chr1	153534599	153536244	321.06	343.66	298.46	-0.202808	0.0392007	0.312317
ENSG00000157741	UBN2	chr7	139230356	139308236	564.336	534.469	594.203	0.152578	0.0392688	0.312676
ENSG00000008441	NFIX	chr19	12995608	13098796	215.873	233.953	197.793	-0.241108	0.0393045	0.312776
ENSG00000132388	UBE2G1	chr17	4269259	4366628	460.096	486.619	433.573	-0.166154	0.039332	0.312812
ENSG00000154133	ROBO4	chr11	124883691	124898500	453.068	479.123	427.013	-0.165749	0.0393827	0.313031
ENSG00000124067	SLC12A4	chr16	67943474	67969601	371.146	346.655	395.636	0.190157	0.0394733	0.313568
ENSG00000125834	STK35	chr20	2101611	2177038	413.916	388.484	439.347	0.177079	0.0395488	0.313921
ENSG00000132405	TBC1D14	chr4	6909242	7033118	284.582	305.741	263.423	-0.214173	0.039613	0.313921
ENSG00000132507	EIF5A	chr17	7306999	7312463	454.366	481.013	427.72	-0.169036	0.0396477	0.313921
ENSG00000174705	SH3PXD2B	chr5	172325000	172454523	472.639	500.189	445.09	-0.168021	0.0396178	0.313921
ENSG00000179981	TSHZ1	chr18	75210755	75289950	310.224	332.506	287.943	-0.206928	0.0396686	0.313921
ENSG00000227467	LINC01537	chr11	72570660	72573229	71.6999	82.1664	61.2335	-0.418309	0.0396392	0.313921
ENSG00000240849	TMEM189	chr20	50118254	50153734	195.718	212.9	178.536	-0.252664	0.0396798	0.313921
ENSG00000085719	CPNE3	chr8	86514427	86561498	674.22	706.142	642.298	-0.136512	0.0399458	0.315474
ENSG00000109805	NCAPG	chr4	17810902	17844862	1405.81	1359.56	1452.05	0.0948802	0.0399233	0.315474
ENSG00000122545	SEPT7	chr7	35800932	35907105	1060.11	1100.75	1019.47	-0.110567	0.0399123	0.315474
ENSG00000075624	ACTB	chr7	5527147	5563784	1428.72	1478.71	1378.72	-0.100938	0.0400999	0.315772
ENSG00000131389	SLC6A6	chr3	14402576	14489349	221.523	240.677	202.369	-0.248977	0.0400974	0.315772
ENSG00000137801	THBS1	chr15	39581079	39599466	3998.18	4084.29	3912.07	-0.0621367	0.0400653	0.315772
ENSG00000153179	RASSF3	chr12	64507001	64697567	440.427	467.013	413.841	-0.17399	0.0400792	0.315772
ENSG00000165417	GTF2A1	chr14	81175452	81221377	881.838	845.129	918.546	0.120043	0.0400693	0.315772
ENSG00000124783	SSR1	chr6	7268306	7347446	1007.13	1047.77	966.491	-0.116373	0.0401437	0.315934
ENSG00000128708	HAT1	chr2	171922448	171983682	457.925	484.493	431.356	-0.16723	0.040256	0.31645
ENSG00000164045	CDC25A	chr3	48157146	48188402	469.574	442.38	496.768	0.16693	0.0402393	0.31645
ENSG00000151470	C4orf33	chr4	129093317	129116640	131.981	117.473	146.489	0.316051	0.0402962	0.316583
ENSG00000169239	CA5B	chrX	15688830	15788409	74.1566	63.5784	84.7348	0.408828	0.0403352	0.316706
ENSG00000215375	MYL5	chr4	673580	682033	33.6586	26.5841	40.7331	0.597359	0.040371	0.316804
ENSG00000107554	DNMBP	chr10	99875577	100009919	1058.43	1098.53	1018.34	-0.109252	0.0404523	0.317258
ENSG00000130844	ZNF331	chr19	53519527	53580269	153.183	138.158	168.208	0.282068	0.0405187	0.317311
ENSG00000149503	INCENP	chr11	62123973	62153163	536.709	565.311	508.107	-0.153627	0.0405525	0.317311
ENSG00000181264	TMEM136	chr11	120325129	120333682	78.9288	68.0668	89.7908	0.394554	0.04049	0.317311
ENSG00000231889	TRAF3IP2-AS1	chr6	111483511	111598302	75.784	64.2559	87.312	0.436501	0.0405335	0.317311
ENSG00000122386	ZNF205	chr16	3112560	3120517	103.349	90.6553	116.043	0.352742	0.04059	0.31742
ENSG00000140983	RHOT2	chr16	668086	674174	193.859	175.632	212.085	0.270685	0.0406296	0.317547
ENSG00000076513	ANKRD13A	chr12	109999186	110039763	606.554	576.3	636.809	0.143801	0.0407607	0.317859
ENSG00000132522	GPS2	chr17	7311324	7315564	130.466	116.366	144.567	0.310669	0.0408334	0.317859
ENSG00000146670	CDCA5	chr11	65066300	65084164	474.758	447.955	501.56	0.162727	0.0408132	0.317859
ENSG00000165185	KIAA1958	chr9	112486847	112669397	138.102	123.477	152.726	0.304482	0.0407916	0.317859
ENSG00000205531	NAP1L4	chr11	2944431	2992377	787.882	822.997	752.767	-0.128522	0.0407429	0.317859
ENSG00000230295	GTF2IP23	chr7	66880708	66882981	9.59549	5.8739	13.3171	1.05854	0.0407839	0.317859
ENSG00000254004	ZNF260	chr19	36510695	36528660	331.086	307.558	354.614	0.204769	0.0406932	0.317859
ENSG00000079819	EPB41L2	chr6	130839347	131063322	782.307	819.45	745.164	-0.136922	0.040939	0.317905
ENSG00000083845	RPS5	chr19	58386400	58394806	267.689	287.839	247.54	-0.216787	0.0409614	0.317905
ENSG00000106211	HSPB1	chr7	76302544	76304295	127.612	141.556	113.667	-0.314079	0.04098	0.317905
ENSG00000173209	AHSA2P	chr2	61177418	61191203	189.87	172.989	206.752	0.25587	0.0409513	0.317905
ENSG00000198690	FAN1	chr15	30903852	30943108	246.177	226.846	265.507	0.226112	0.0409092	0.317905
ENSG00000213976	AC010615.1	chr19	21382865	21387177	14.2929	9.63616	18.9496	0.907382	0.0409025	0.317905
ENSG00000163788	SNRK	chr3	43286512	43424764	939.758	979.531	899.984	-0.122061	0.0410038	0.317908
ENSG00000187800	PEAR1	chr1	156893698	156916434	428.874	454.441	403.308	-0.171812	0.0410472	0.318063
ENSG00000154319	FAM167A	chr8	11421463	11475908	79.1682	90.4276	67.9088	-0.407941	0.0410905	0.318217
ENSG00000132383	RPA1	chr17	1829702	1900082	616.835	648.354	585.317	-0.147324	0.0411298	0.318225
ENSG00000137103	TMEM8B	chr9	35814451	35865518	28.4576	21.8914	35.0238	0.654148	0.0411385	0.318225
ENSG00000081019	RSBN1	chr1	113761832	113812476	521.302	493.422	549.182	0.154168	0.0411654	0.318252
ENSG00000142856	ITGB3BP	chr1	63440770	63593721	362.475	339.208	385.743	0.184957	0.0412837	0.318985
ENSG00000173473	SMARCC1	chr3	47585272	47782106	1331.88	1377.37	1286.4	-0.09851	0.0415385	0.320771
ENSG00000198890	PRMT6	chr1	107056679	107067636	158.97	174.417	143.523	-0.279485	0.0416481	0.321252
ENSG00000234062	AL390879.1	chrX	136909395	137021630	9.28046	5.53899	13.0219	1.10055	0.0416341	0.321252
ENSG00000257702	LBX2-AS1	chr2	74502595	74504678	15.026	10.3365	19.7155	0.869733	0.0416751	0.321277
ENSG00000145860	RNF145	chr5	159157409	159210053	508.364	535.569	481.159	-0.154257	0.0417295	0.321308
ENSG00000149273	RPS3	chr11	75399486	75422280	577.704	606.984	548.424	-0.146115	0.0417476	0.321308
ENSG00000158106	RHPN1	chr8	143368887	143384220	15.0717	10.2356	19.9078	0.895957	0.0417501	0.321308
ENSG00000164305	CASP3	chr4	184627696	184649509	520.665	548.541	492.789	-0.154334	0.0418144	0.32162
ENSG00000113716	HMGXB3	chr5	150000046	150053142	536.446	508.393	564.499	0.150746	0.0419016	0.322108
ENSG00000248124	RRN3P1	chr16	21796106	21820410	42.8708	34.9788	50.7627	0.524766	0.0419351	0.322183
ENSG00000115484	CCT4	chr2	61868089	61888804	837.817	873.358	802.276	-0.122329	0.0421039	0.323114
ENSG00000182325	FBXL6	chr8	144355431	144359376	47.7423	39.3684	56.1161	0.500669	0.0420912	0.323114
ENSG00000185800	DMWD	chr19	45782947	45792802	217.628	199.578	235.679	0.238769	0.0421659	0.323407
ENSG00000100324	TAB1	chr22	39399741	39437060	192.861	175.851	209.87	0.253818	0.0422755	0.323882
ENSG00000113504	SLC12A7	chr5	1050376	1112035	129.313	115.532	143.094	0.306289	0.0422535	0.323882
ENSG00000120756	PLS1	chr3	142596387	142713664	182.269	165.336	199.203	0.267364	0.0424137	0.324255
ENSG00000136997	MYC	chr8	127735434	127741434	380.831	404.43	357.232	-0.17856	0.0424198	0.324255
ENSG00000157625	TAB3	chrX	30827442	30975084	562.068	532.519	591.616	0.151558	0.0423759	0.324255
ENSG00000185404	SP140L	chr2	230327184	230403732	292.265	271.333	313.198	0.206303	0.0424027	0.324255
ENSG00000176105	YES1	chr18	721588	812546	1178.93	1222.27	1135.59	-0.106036	0.0424782	0.324518
ENSG00000134321	RSAD2	chr2	6865806	6898239	145.837	129.101	162.574	0.330308	0.0426015	0.325277
ENSG00000136485	DCAF7	chr17	63550461	63594266	900.549	936.784	864.315	-0.11603	0.0427126	0.325942
ENSG00000125166	GOT2	chr16	58707131	58734357	614.962	645.078	584.845	-0.141189	0.0427733	0.326009
ENSG00000177409	SAMD9L	chr7	93130055	93148369	808.678	844.992	772.364	-0.129498	0.0427771	0.326009
ENSG00000198931	APRT	chr16	88809339	88811944	62.4209	72.3054	52.5364	-0.453401	0.0427935	0.326009
ENSG00000137124	ALDH1B1	chr9	38392664	38398661	213.303	230.959	195.648	-0.238252	0.042931	0.326767
ENSG00000185379	RAD51D	chr17	35092208	35121522	216.484	197.907	235.061	0.247068	0.0429411	0.326767
ENSG00000153551	CMTM7	chr3	32391671	32483067	84.5244	95.9749	73.074	-0.388644	0.042981	0.326887
ENSG00000068650	ATP11A	chr13	112690329	112887168	639.88	670.795	608.966	-0.139292	0.0431316	0.327849
ENSG00000006118	TMEM132A	chr11	60924463	60937159	139.847	154.727	124.967	-0.305971	0.0431704	0.32796
ENSG00000041357	PSMA4	chr15	78540405	78552419	464.524	490.739	438.309	-0.162656	0.0431962	0.327972
ENSG00000125046	SSUH2	chr3	8619400	8745040	13.3835	8.9929	17.7741	0.90977	0.0432318	0.327986
ENSG00000140682	TGFB1I1	chr16	31471585	31477960	207.104	224.699	189.508	-0.244552	0.0432544	0.327986
ENSG00000179941	BBS10	chr12	76344474	76348442	191.86	173.729	209.99	0.272054	0.0432705	0.327986
ENSG00000039123	MTREX	chr5	55307760	55425581	823.513	858.868	788.157	-0.123803	0.0433917	0.328257
ENSG00000154222	CC2D1B	chr1	52345723	52366193	263.359	243.751	282.967	0.214412	0.0433508	0.328257
ENSG00000213337	ANKRD39	chr2	96836611	96858095	28.4941	22.0511	34.937	0.640634	0.0433551	0.328257
ENSG00000224424	PRKAR2A-AS1	chr3	48847572	48851981	8.78878	5.09792	12.4796	1.14439	0.0434031	0.328257
ENSG00000087253	LPCAT2	chr16	55508998	55586670	411.378	435.95	386.805	-0.172139	0.0434384	0.328341
ENSG00000114439	BBX	chr3	107522936	107811324	1213.07	1256.19	1169.95	-0.102527	0.0435806	0.328357
ENSG00000124201	ZNFX1	chr20	49237946	49278426	1500.8	1452.48	1549.12	0.0928681	0.04361	0.328357
ENSG00000151687	ANKAR	chr2	189674290	189761193	64.6974	54.9475	74.4474	0.431398	0.0435876	0.328357
ENSG00000165757	JCAD	chr10	30012800	30115494	1257.94	1303.24	1212.64	-0.103864	0.0434709	0.328357
ENSG00000169247	SH3TC2	chr5	148923639	149063163	54.7757	64.1089	45.4425	-0.487411	0.0435392	0.328357
ENSG00000171827	ZNF570	chr19	37467585	37488652	177.997	161.929	194.064	0.259706	0.0435491	0.328357
ENSG00000197872	FAM49A	chr2	16549459	16666331	200.059	217.332	182.786	-0.248499	0.0435824	0.328357
ENSG00000088682	COQ9	chr16	57447425	57461275	291.362	270.841	311.884	0.202863	0.0436636	0.328579
ENSG00000129680	MAP7D3	chrX	136213220	136256482	678.541	710.977	646.105	-0.137831	0.0438051	0.329461
ENSG00000183255	PTTG1IP	chr21	44849585	44873903	940.731	978.285	903.177	-0.115123	0.0439462	0.330339
ENSG00000100376	FAM118A	chr22	45308968	45341955	99.4988	87.4665	111.531	0.347121	0.0441966	0.331304
ENSG00000136932	TRMO	chr9	97904489	97922570	135.282	121.203	149.361	0.299159	0.0441606	0.331304
ENSG00000143179	UCK2	chr1	165827531	165911618	468.978	495.144	442.812	-0.160812	0.0441671	0.331304
ENSG00000164342	TLR3	chr4	186069152	186088069	84.8984	96.5545	73.2424	-0.393964	0.0441416	0.331304
ENSG00000184384	MAML2	chr11	95976598	96343180	307.619	328.568	286.669	-0.196163	0.0441869	0.331304
ENSG00000066044	ELAVL1	chr19	7958579	8005659	600.473	631.166	569.78	-0.147369	0.0442642	0.33146
ENSG00000072110	ACTN1	chr14	68874143	68979440	1387.71	1435.61	1339.8	-0.0995778	0.0444179	0.33146
ENSG00000075711	DLG1	chr3	197042560	197299300	904.67	941.553	867.786	-0.117572	0.0444862	0.33146
ENSG00000100150	DEPDC5	chr22	31753867	31908033	117.535	104.187	130.882	0.326282	0.0443525	0.33146
ENSG00000105993	DNAJB6	chr7	157335381	157417439	481.353	507.675	455.031	-0.157613	0.0444623	0.33146
ENSG00000120733	KDM3B	chr5	138352596	138437028	994.929	956.089	1033.77	0.112583	0.0444006	0.33146
ENSG00000167005	NUDT21	chr16	56429133	56452199	1092.42	1133.61	1051.23	-0.108739	0.0443341	0.33146
ENSG00000187840	EIF4EBP1	chr8	38030341	38060365	127.868	141.545	114.191	-0.307398	0.0444524	0.33146
ENSG00000221990	EXOC3-AS1	chr5	441498	443160	29.7368	23.089	36.3846	0.634068	0.0443128	0.33146
ENSG00000230487	PSMG3-AS1	chr7	1570073	1589626	11.2547	7.24803	15.2614	0.979333	0.0444154	0.33146
ENSG00000261087	AP003469.4	chr8	101166805	101169629	16.362	11.2815	21.4425	0.869749	0.0444026	0.33146
ENSG00000125901	MRPS26	chr20	3045945	3048254	113.94	126.65	101.231	-0.320366	0.0446347	0.332202
ENSG00000141349	G6PC3	chr17	44070735	44076344	76.5662	87.4426	65.6898	-0.407274	0.0446336	0.332202
ENSG00000168827	GFM1	chr3	158644278	158692575	558.81	587.142	530.478	-0.146156	0.0447066	0.332555
ENSG00000092841	MYL6	chr12	56158161	56163496	376.521	400.404	352.638	-0.182781	0.0447554	0.332735
ENSG00000169710	FASN	chr17	82078333	82098332	1082.63	1123	1042.27	-0.107527	0.0447839	0.332764
ENSG00000108561	C1QBP	chr17	5432777	5448830	482.16	508.673	455.646	-0.158497	0.0448806	0.333301
ENSG00000156853	ZNF689	chr16	30602558	30624012	185.922	169.482	202.362	0.254437	0.0449119	0.33335
ENSG00000177192	PUS1	chr12	131929200	131945896	196.681	213.35	180.012	-0.243884	0.0449493	0.333446
ENSG00000113161	HMGCR	chr5	75336329	75362104	672.508	704.224	640.793	-0.135975	0.0450711	0.333996
ENSG00000136111	TBC1D4	chr13	75283503	75482114	626.592	656.875	596.309	-0.139336	0.0450751	0.333996
ENSG00000162817	C1orf115	chr1	220689845	220699157	472.401	499.265	445.536	-0.163918	0.0450974	0.333996
ENSG00000101955	SRPX	chrX	38149336	38220924	131.634	145.339	117.93	-0.299201	0.045447	0.334068
ENSG00000104613	INTS10	chr8	19817140	19852083	352.334	375.168	329.499	-0.186729	0.0454384	0.334068
ENSG00000108262	GIT1	chr17	29573469	29594054	516.628	545.643	487.613	-0.161906	0.0453084	0.334068
ENSG00000128340	RAC2	chr22	37225261	37244448	79.6318	90.8822	68.3814	-0.405237	0.0453709	0.334068
ENSG00000141577	CEP131	chr17	81189593	81222999	208.664	190.264	227.063	0.253872	0.0453351	0.334068
ENSG00000154957	ZNF18	chr17	11977439	11997510	69.5184	59.4194	79.6174	0.41608	0.0453512	0.334068
ENSG00000158270	COLEC12	chr18	316740	500722	18.4274	23.6336	13.2213	-0.792574	0.0452704	0.334068
ENSG00000166341	DCHS1	chr11	6621323	6655854	324.296	347.79	300.802	-0.208754	0.0454159	0.334068
ENSG00000177125	ZBTB34	chr9	126860665	126885878	236.664	217.882	255.446	0.228502	0.0452834	0.334068
ENSG00000184840	TMED9	chr5	177592158	177596124	362.435	385.948	338.921	-0.186942	0.0454517	0.334068
ENSG00000197943	PLCG2	chr16	81739097	81962693	290.656	269.477	311.835	0.209895	0.0452071	0.334068
ENSG00000206337	HCP5	chr6	31400702	31477506	22.2718	16.5413	28.0023	0.725409	0.0452207	0.334068
ENSG00000223959	AFG3L1P	chr16	89972586	90002161	126.099	112.526	139.672	0.309317	0.045254	0.334068
ENSG00000233016	SNHG7	chr9	136721366	136728184	82.8586	71.5968	94.1203	0.389848	0.0452798	0.334068
ENSG00000013503	POLR3B	chr12	106357658	106510198	347.778	369.886	325.669	-0.183145	0.0455662	0.334547
ENSG00000212123	PRR22	chr19	5782960	5784765	9.74382	5.90707	13.5806	1.0779	0.045559	0.334547
ENSG00000117713	ARID1A	chr1	26693236	26782110	1240.9	1285.59	1196.21	-0.103866	0.0456887	0.335083
ENSG00000139433	GLTP	chr12	109850943	109880488	271.464	291.151	251.777	-0.20885	0.045672	0.335083
ENSG00000169955	ZNF747	chr16	30530367	30535347	85.4495	73.7682	97.1309	0.392284	0.0457278	0.335189
ENSG00000135870	RC3H1	chr1	173931214	174022297	627.344	657.322	597.367	-0.137761	0.0459042	0.336301
ENSG00000169714	CNBP	chr3	129169484	129183922	874.1	910.285	837.914	-0.11938	0.0459529	0.336475
ENSG00000123143	PKN1	chr19	14433053	14471867	505.2	532.308	478.093	-0.154665	0.0460728	0.337172
ENSG00000056558	TRAF1	chr9	120902393	120929173	26.9264	20.5071	33.3456	0.675312	0.0461545	0.337249
ENSG00000115844	DLX2	chr2	172099439	172102900	13.6972	9.32913	18.0652	0.884223	0.046158	0.337249
ENSG00000171867	PRNP	chr20	4686236	4701590	873.081	908.621	837.541	-0.117385	0.0461101	0.337249
ENSG00000169282	KCNAB1	chr3	156037701	156539138	390.046	413.61	366.481	-0.174085	0.0463112	0.338186
ENSG00000153064	BANK1	chr4	101411286	102074812	10.3549	6.47736	14.2324	1.02654	0.0464614	0.339003
ENSG00000160703	NLRX1	chr11	119166568	119184016	53.67	44.5765	62.7635	0.484441	0.0465265	0.339003
ENSG00000176715	ACSF3	chr16	89088375	89164121	227.917	209.759	246.076	0.229358	0.0464881	0.339003
ENSG00000179832	MROH1	chr8	144148016	144261940	176.48	160.081	192.879	0.267369	0.0465479	0.339003
ENSG00000198121	LPAR1	chr9	110873263	111038458	87.7118	99.2616	76.1621	-0.377804	0.0465418	0.339003
ENSG00000158062	UBXN11	chr1	26281328	26318363	82.017	71.2508	92.7831	0.376315	0.046607	0.339251
ENSG00000164284	GRPEL2	chr5	149345430	149354583	443.798	418.712	468.883	0.162904	0.0466517	0.339394
ENSG00000120156	TEK	chr9	27109141	27230175	637.048	667.181	606.915	-0.136369	0.0467398	0.339478
ENSG00000147889	CDKN2A	chr9	21967753	21995301	220.411	238.698	202.124	-0.238855	0.0467426	0.339478
ENSG00000163050	COQ8A	chr1	226897536	226987545	154.441	139.514	169.368	0.277937	0.046741	0.339478
ENSG00000164663	USP49	chr6	41789896	41895361	156.357	141.48	171.234	0.273617	0.0467633	0.339478
ENSG00000159335	PTMS	chr12	6765516	6770952	426.673	451.957	401.389	-0.170781	0.0468074	0.339617
ENSG00000081181	ARG2	chr14	67619798	67651720	41.6619	33.9967	49.3271	0.524118	0.0469019	0.340121
ENSG00000152234	ATP5F1A	chr18	46080248	46104334	676.501	707.526	645.476	-0.132225	0.0469764	0.340479
ENSG00000155744	FAM126B	chr2	200973718	201071671	517.015	490.134	543.895	0.149861	0.0470469	0.340808
ENSG00000120708	TGFBI	chr5	136028895	136063818	1550.09	1600.49	1499.7	-0.0937749	0.0472675	0.341684
ENSG00000145335	SNCA	chr4	89724099	89838315	66.1876	76.2588	56.1164	-0.435794	0.0472686	0.341684
ENSG00000175470	PPP2R2D	chr10	131900644	131959834	253.215	272.058	234.371	-0.214273	0.0472564	0.341684
ENSG00000197150	ABCB8	chr7	151028422	151047782	144.675	130.274	159.077	0.28618	0.0472211	0.341684
ENSG00000109861	CTSC	chr11	88293592	88337787	426.02	451.128	400.911	-0.169855	0.0472954	0.341696
ENSG00000003249	DBNDD1	chr16	90004865	90020128	127.291	140.61	113.971	-0.300654	0.0474016	0.341754
ENSG00000115904	SOS1	chr2	38981396	39124345	923.333	959.354	887.312	-0.1125	0.0473348	0.341754
ENSG00000121542	SEC22A	chr3	123201927	123274130	104.977	92.5294	117.424	0.340475	0.0473996	0.341754
ENSG00000197935	ZNF311	chr6	28994785	29005316	16.5492	11.7796	21.3188	0.804412	0.0474042	0.341754
ENSG00000103342	GSPT1	chr16	11868128	11916082	1225.86	1270.66	1181.05	-0.10543	0.0476817	0.342929
ENSG00000110619	CARS	chr11	3000922	3057613	542.82	514.588	571.052	0.149929	0.0477441	0.342929
ENSG00000114127	XRN1	chr3	142306607	142448062	1178.82	1138.17	1219.46	0.0994361	0.0477244	0.342929
ENSG00000148516	ZEB1	chr10	31318495	31529814	1162.58	1203.65	1121.51	-0.10189	0.0476071	0.342929
ENSG00000188283	ZNF383	chr19	37217926	37248738	112.564	99.7156	125.412	0.327852	0.0477144	0.342929
ENSG00000197565	COL4A6	chrX	108155607	108439497	129.796	144.564	115.029	-0.327163	0.0476562	0.342929
ENSG00000232855	AF165147.1	chr21	28439346	28674848	11.1735	7.18433	15.1627	0.981729	0.0477287	0.342929
ENSG00000069849	ATP1B3	chr3	141876124	141926514	435.315	460.15	410.479	-0.164417	0.0477922	0.343092
ENSG00000087087	SRRT	chr7	100875111	100888664	930.471	894.141	966.8	0.112594	0.0478604	0.3434
ENSG00000101871	MID1	chrX	10445310	10833654	197.37	214.709	180.031	-0.252854	0.0479724	0.344022
ENSG00000070669	ASNS	chr7	97852118	97872542	9.49896	5.90707	13.0908	1.02861	0.0480659	0.344147
ENSG00000128346	C22orf23	chr22	37943050	37953669	14.0573	9.63351	18.4811	0.873458	0.0480605	0.344147
ENSG00000128908	INO80	chr15	40978880	41116354	856.627	821.67	891.585	0.117676	0.0480627	0.344147
ENSG00000089127	OAS1	chr12	112906777	112933222	487.089	514.057	460.121	-0.159586	0.048168	0.344615
ENSG00000259877	AC009113.1	chr16	89215211	89217653	23.3139	17.6894	28.9385	0.679786	0.048182	0.344615
ENSG00000073849	ST6GAL1	chr3	186930485	187078553	177.225	193.012	161.439	-0.256247	0.0482276	0.344759
ENSG00000151693	ASAP2	chr2	9206765	9405683	932.62	969.331	895.909	-0.113516	0.0483312	0.345317
ENSG00000078237	TIGAR	chr12	4307763	4354593	40.7625	33.0384	48.4866	0.539878	0.0483667	0.345389
ENSG00000123179	EBPL	chr13	49660723	49691475	95.0056	106.604	83.4069	-0.350303	0.0485035	0.34582
ENSG00000263001	GTF2I	chr7	74657667	74760692	417.405	442.008	392.802	-0.169862	0.0484851	0.34582
ENSG00000273802	HIST1H2BG	chr6	26215159	26216692	155.199	169.918	140.479	-0.272719	0.0484852	0.34582
ENSG00000176095	IP6K1	chr3	49724294	49786542	462.762	437.439	488.085	0.157707	0.0487354	0.347291
ENSG00000138668	HNRNPD	chr4	82352498	82374503	924.326	960.416	888.237	-0.112593	0.0488653	0.348034
ENSG00000005812	FBXL3	chr13	76992598	77027195	842.936	808.644	877.229	0.117308	0.0489673	0.348212
ENSG00000015532	XYLT2	chr17	50346092	50363138	239.589	257.882	221.296	-0.219807	0.0489531	0.348212
ENSG00000048392	RRM2B	chr8	102204502	102239118	475.576	449.303	501.849	0.15923	0.0489268	0.348212
ENSG00000087095	NLK	chr17	28041737	28196381	322.083	343.297	300.868	-0.189735	0.0490897	0.348535
ENSG00000111331	OAS3	chr12	112938352	112973249	1857.04	1801.91	1912.18	0.0856458	0.049044	0.348535
ENSG00000185219	ZNF445	chr3	44431720	44477670	669.693	639.017	700.37	0.132066	0.0490769	0.348535
ENSG00000134107	BHLHE40	chr3	4979116	4985323	277.694	297.727	257.661	-0.207768	0.0491508	0.348767
ENSG00000141756	FKBP10	chr17	41812680	41823217	317.706	339.306	296.106	-0.195856	0.0491739	0.348767
ENSG00000065665	SEC61A2	chr10	12129637	12169961	79.3326	68.6649	90.0003	0.385438	0.0492506	0.348917
ENSG00000164647	STEAP1	chr7	90154375	90164829	141.626	155.732	127.52	-0.28631	0.0492246	0.348917
ENSG00000204628	RACK1	chr5	181236909	181248096	803.268	838.319	768.217	-0.125829	0.0492722	0.348917
ENSG00000183513	COA5	chr2	98599310	98608515	82.2183	71.564	92.8726	0.371451	0.0493278	0.349129
ENSG00000167785	ZNF558	chr19	8806170	8832328	63.6773	54.2034	73.1512	0.425713	0.0493728	0.349265
ENSG00000008256	CYTH3	chr7	6161776	6272644	490.575	516.801	464.349	-0.154083	0.0494686	0.349521
ENSG00000140795	MYLK3	chr16	46703369	46790407	7.33498	4.13168	10.5383	1.16893	0.0494863	0.349521
ENSG00000167967	E4F1	chr16	2223566	2235742	226.734	209.11	244.358	0.223744	0.0494687	0.349521
ENSG00000164828	SUN1	chr7	816615	896435	670.882	702.116	639.648	-0.134232	0.0496223	0.350211
ENSG00000166225	FRS2	chr12	69470349	69579789	416.584	391.76	441.409	0.171733	0.0496433	0.350211
ENSG00000185950	IRS2	chr13	109752698	109786568	149.213	134.528	163.899	0.282992	0.0496614	0.350211
ENSG00000068001	HYAL2	chr3	50317790	50322906	215.939	233.013	198.865	-0.227563	0.0496987	0.350292
ENSG00000064933	PMS1	chr2	189784085	189877629	459.123	433.407	484.839	0.161433	0.0497503	0.350474
ENSG00000268043	NBPF12	chr1	146938744	146996202	79.5693	68.7273	90.4113	0.390649	0.0498012	0.35065
ENSG00000009307	CSDE1	chr1	114716913	114758676	1557.34	1605.72	1508.95	-0.0896143	0.0498284	0.35066
ENSG00000084731	KIF3C	chr2	25926596	25982749	243.986	263.417	224.556	-0.229329	0.0498842	0.350689
ENSG00000140526	ABHD2	chr15	89087459	89202360	784.169	817.796	750.541	-0.123651	0.0498652	0.350689
ENSG00000172748	ZNF596	chr8	232137	264703	72.4372	62.1159	82.7585	0.408231	0.0499316	0.35084
ENSG00000263956	NBPF11	chr1	148102046	148152322	65.3437	55.8588	74.8286	0.415359	0.0500101	0.35121
ENSG00000123416	TUBA1B	chr12	49127782	49131397	664.552	695.288	633.815	-0.133347	0.0501187	0.35179
ENSG00000163009	C2orf48	chr2	10141382	10211725	35.7887	28.636	42.9414	0.568231	0.0501694	0.351964
ENSG00000104687	GSR	chr8	30678061	30727999	286.506	306.572	266.439	-0.201717	0.0502152	0.352103
ENSG00000144560	VGLL4	chr3	11556070	11771350	224.288	242.486	206.089	-0.233586	0.050331	0.352733
ENSG00000111271	ACAD10	chr12	111686056	111757107	143.802	129.505	158.1	0.285826	0.0506105	0.353245
ENSG00000122591	FAM126A	chr7	22889371	23014130	1102.6	1141.56	1063.65	-0.101881	0.0505314	0.353245
ENSG00000141258	SGSM2	chr17	2337498	2381058	231.373	249.325	213.421	-0.223357	0.0506387	0.353245
ENSG00000147883	CDKN2B	chr9	22002903	22009363	122.647	109.569	135.724	0.306312	0.0506644	0.353245
ENSG00000163697	APBB2	chr4	40810027	41216714	847.854	882.468	813.24	-0.117723	0.0504583	0.353245
ENSG00000179222	MAGED1	chrX	51803007	51902357	387.742	412.291	363.193	-0.182454	0.0505469	0.353245
ENSG00000188312	CENPP	chr9	92325484	92620533	280.822	260.478	301.166	0.208652	0.0504731	0.353245
ENSG00000198185	ZNF334	chr20	46499630	46513559	26.3847	20.37	32.3994	0.644237	0.0505953	0.353245
ENSG00000198556	ZNF789	chr7	99472841	99503650	87.3451	76.4549	98.2353	0.357497	0.0506218	0.353245
ENSG00000268471	MIR4453HG	chr4	152536264	152539263	45.6502	37.5904	53.71	0.503562	0.0505244	0.353245
ENSG00000106780	MEGF9	chr9	120600813	120714470	233.082	214.811	251.353	0.225677	0.0507535	0.353685
ENSG00000110931	CAMKK2	chr12	121237691	121298308	271.391	290.954	251.828	-0.207586	0.0508595	0.354241
ENSG00000089327	FXYD5	chr19	35154730	35169883	260.59	280.099	241.08	-0.215593	0.0509178	0.354435
ENSG00000106991	ENG	chr9	127815012	127854756	871.375	908.775	833.975	-0.123776	0.051029	0.354435
ENSG00000112855	HARS2	chr5	140691426	140699318	286.013	266.342	305.684	0.198063	0.0510441	0.354435
ENSG00000151611	MMAA	chr4	145599042	145660035	58.699	67.5655	49.8325	-0.431732	0.0510342	0.354435
ENSG00000169359	SLC33A1	chr3	155821024	155854456	177.883	161.975	193.792	0.257282	0.0510405	0.354435
ENSG00000197647	ZNF433	chr19	12014732	12035741	51.2282	42.7993	59.657	0.469768	0.0509944	0.354435
ENSG00000101181	MTG2	chr20	62183029	62203568	215.441	197.913	232.969	0.234177	0.0510748	0.354467
ENSG00000106993	CDC37L1	chr9	4679559	4708398	253.47	234.671	272.27	0.213552	0.0511565	0.354852
ENSG00000181045	SLC26A11	chr17	80219699	80253500	42.6948	35.0399	50.3498	0.510765	0.051226	0.355153
ENSG00000023191	RNH1	chr11	494512	507300	332.264	353.87	310.657	-0.187331	0.0512764	0.355321
ENSG00000110274	CEP164	chr11	117314557	117413268	645.228	615.525	674.932	0.13272	0.0514052	0.35585
ENSG00000172943	PHF8	chrX	53936676	54048958	336.867	315.129	358.605	0.185899	0.0513936	0.35585
ENSG00000125944	HNRNPR	chr1	23303771	23344336	1244.89	1286.99	1202.8	-0.0975288	0.051502	0.356338
ENSG00000161016	RPL8	chr8	144789765	144792587	539.145	568.256	510.034	-0.155658	0.0516111	0.356911
ENSG00000121101	TEX14	chr17	58556678	58692055	8.56519	5.10057	12.0298	1.0948	0.0517061	0.357386
ENSG00000130305	NSUN5	chr7	73302517	73308867	116.651	103.758	129.545	0.317484	0.0517655	0.357615
ENSG00000127947	PTPN12	chr7	77537275	77640071	957.714	993.52	921.909	-0.107811	0.0519628	0.357702
ENSG00000146247	PHIP	chr6	78935867	79078236	2001.84	1947.36	2056.33	0.078509	0.0519013	0.357702
ENSG00000148484	RSU1	chr10	16590611	16817528	569.936	597.841	542.032	-0.141135	0.051866	0.357702
ENSG00000157353	FUK	chr16	70454421	70480274	40.5155	32.7676	48.2634	0.544875	0.0519347	0.357702
ENSG00000173852	DPY19L1	chr7	34928876	35038271	655.841	685.568	626.114	-0.130675	0.0518096	0.357702
ENSG00000240445	FOXO3B	chr17	18670946	18672873	18.626	23.5659	13.6861	-0.742211	0.0519492	0.357702
ENSG00000254986	DPP3	chr11	66480013	66509657	187.549	203.471	171.626	-0.244247	0.0518995	0.357702
ENSG00000198039	ZNF273	chr7	64870172	64930966	117.847	105.12	130.573	0.310167	0.0520201	0.35783
ENSG00000213445	SIPA1	chr11	65638097	65650930	184.427	200.592	168.263	-0.252178	0.052034	0.35783
ENSG00000085185	BCORL1	chrX	129981107	130058083	242.918	260.979	224.857	-0.214045	0.0520907	0.357911
ENSG00000130813	C19orf66	chr19	10086122	10093252	139.836	125.661	154.012	0.291403	0.0521251	0.357911
ENSG00000158710	TAGLN2	chr1	159918107	159925732	466.962	492.599	441.326	-0.158232	0.0521076	0.357911
ENSG00000100934	SEC23A	chr14	39031919	39109646	977.158	1013.46	940.852	-0.107147	0.0522635	0.358219
ENSG00000151320	AKAP6	chr14	32329273	32837681	23.6946	18.0906	29.2985	0.666384	0.0522551	0.358219
ENSG00000159231	CBR3	chr21	36134912	36146566	62.3326	71.4923	53.1729	-0.420257	0.0522015	0.358219
ENSG00000197043	ANXA6	chr5	151100712	151157882	309.787	330.637	288.937	-0.193867	0.0522755	0.358219
ENSG00000139644	TMBIM6	chr12	49707725	49764934	919.993	955.66	884.326	-0.111797	0.052332	0.358328
ENSG00000206149	HERC2P9	chr15	28589492	28685264	80.7419	69.3578	92.1261	0.404475	0.0523443	0.358328
ENSG00000188641	DPYD	chr1	97077743	97995000	252.419	271.555	233.283	-0.218291	0.0524858	0.359116
ENSG00000100330	MTMR3	chr22	29883155	30030866	416.539	392.748	440.33	0.164586	0.0525413	0.359314
ENSG00000066827	ZFAT	chr8	134477788	134713049	237.861	219.962	255.761	0.216625	0.0527387	0.360141
ENSG00000126012	KDM5C	chrX	53191321	53225422	625.444	595.917	654.971	0.136101	0.0527373	0.360141
ENSG00000132294	EFR3A	chr8	131904088	132013642	901.25	936.057	866.443	-0.111368	0.0527611	0.360141
ENSG00000277462	ZNF670	chr1	247036784	247078755	44.4099	36.6122	52.2076	0.500432	0.0527684	0.360141
ENSG00000172977	KAT5	chr11	65711996	65719604	177.659	162.191	193.126	0.250434	0.052841	0.360456
ENSG00000178726	THBD	chr20	23045633	23049741	618.1	648.665	587.536	-0.142565	0.0528959	0.360649
ENSG00000135414	GDF11	chr12	55743280	55757278	249.382	268.01	230.755	-0.215057	0.0530357	0.361345
ENSG00000196419	XRCC6	chr22	41621119	41664048	802.678	835.825	769.531	-0.119072	0.0530513	0.361345
ENSG00000085365	SCAMP1	chr5	78360583	78479071	460.045	485.117	434.973	-0.157067	0.0531761	0.361568
ENSG00000127980	PEX1	chr7	92487020	92528531	470.621	445.376	495.865	0.154593	0.0531468	0.361568
ENSG00000130309	COLGALT1	chr19	17555594	17583162	650.961	681.05	620.872	-0.13326	0.0532436	0.361568
ENSG00000156050	FAM161B	chr14	73931501	73950414	195.471	179.288	211.654	0.238208	0.0532441	0.361568
ENSG00000178202	KDELC2	chr11	108472105	108498432	540.376	567.636	513.116	-0.145411	0.0531561	0.361568
ENSG00000183873	SCN5A	chr3	38548057	38649673	113.543	126.26	100.826	-0.321677	0.0531967	0.361568
[truncated: 18,844 more rows]
